# Supplementary material for: Controlled synthesis of unsubstituted high molecular weight poly(para-phenylene) via Suzuki polycondensation-thermal aromatization methodology
Source: Royal Society of Chemistry journal article supplement (doi:10.1039/d0py00001a), 2020-01-01

## Supporting Information

### **Controlled Synthesis of Unsubstituted High Molecular Weight Poly(*para*-phenylene) via Suzuki Polycondensation-Thermal Aromatization Methodology**

Dražen Pavlović<sup>\*,†,‡</sup> and Shmuel Cohen<sup>§</sup>

<sup>†</sup>*Bar Ilan University, Department of Chemistry, Ramat-Gan 52900, Israel*

<sup>§</sup>*The Hebrew University of Jerusalem, Department of Inorganic Chemistry, Jerusalem 91904, Israel*

#### **Table of Contents**

|                                                                                       |     |
|---------------------------------------------------------------------------------------|-----|
| X-ray Crystal Structure Data for <i>cis-3a</i>                                        | S3  |
| <u><i>Spectral data for the compounds in the Experimental Section:</i></u>            |     |
| <sup>1</sup> H NMR Spectrum of <i>cis-3a</i>                                          | S4  |
| <sup>13</sup> C NMR Spectrum of <i>cis-3a</i>                                         | S5  |
| TGA Spectrum of <i>cis-3a</i>                                                         | S6  |
| <sup>1</sup> H NMR Spectrum of <i>trans-3b</i> in CDCl <sub>3</sub>                   | S7  |
| <sup>13</sup> C NMR Spectrum of <i>trans-3b</i> in CDCl <sub>3</sub>                  | S8  |
| <sup>1</sup> H NMR Spectrum of <i>trans-3b</i> in CD <sub>3</sub> OD                  | S9  |
| <sup>13</sup> C NMR Spectrum of <i>trans-3b</i> in CD <sub>3</sub> OD                 | S10 |
| TGA Spectrum of <i>trans-3b</i>                                                       | S11 |
| <sup>1</sup> H NMR Spectrum of <i>cis-4a</i>                                          | S12 |
| <sup>13</sup> C NMR Spectrum of <i>cis-4a</i>                                         | S13 |
| <sup>1</sup> H NMR Spectrum of <i>trans-4b</i>                                        | S14 |
| <sup>13</sup> C NMR Spectrum of <i>trans-4b</i>                                       | S15 |
| <sup>1</sup> H NMR Spectrum of <i>cis-5</i>                                           | S16 |
| <sup>13</sup> C NMR Spectrum of <i>cis-5</i>                                          | S17 |
| DEPT-135 Spectrum of <i>cis-5</i>                                                     | S18 |
| <sup>1</sup> H NMR Spectrum of <i>cis-1a</i>                                          | S19 |
| COSY spectrum of <i>cis-1a</i>                                                        | S20 |
| Expanded region of COSY spectrum of <i>cis-1a</i> showing end-group correlation peaks | S21 |
| <sup>13</sup> C NMR Spectrum of <i>cis-1a</i>                                         | S22 |
| HMBC Spectrum of <i>cis-1a</i>                                                        | S23 |
| Expanded region of HMBC spectrum of <i>cis-1a</i> showing end-group correlation peaks | S24 |
| TGA Spectrum of <i>cis-1a</i>                                                         | S25 |
| SEC traces of <i>cis-1a</i> and <i>trans-1b</i>                                       | S26 |

<sup>‡</sup>Present address: Almac Sciences, Biocatalysis Group, 20 Seagoe Industrial Estate, Craigavon, United Kingdom BT63 5QD. E-mail: [drazen.pavlovic@almacgroup.com](mailto:drazen.pavlovic@almacgroup.com).

|                                                                                         |     |
|-----------------------------------------------------------------------------------------|-----|
| <sup>1</sup> H NMR Spectrum of <i>trans-1b</i>                                          | S27 |
| COSY spectrum of <i>trans-1b</i>                                                        | S28 |
| Expanded region of COSY spectrum of <i>trans-1b</i> showing end-group correlation peaks | S29 |
| <sup>13</sup> C NMR Spectrum of <i>trans-1b</i>                                         | S30 |
| HMBC Spectrum of <i>trans-1b</i>                                                        | S31 |
| Expanded region of HMBC spectrum of <i>trans-1b</i> showing end-group correlation peaks | S32 |
| TGA Spectrum of <i>trans-1b</i>                                                         | S33 |
| <sup>1</sup> H NMR Spectrum of high molecular weight <i>trans-1b</i>                    | S34 |
| <sup>13</sup> C NMR Spectrum of high molecular weight <i>trans-1b</i>                   | S35 |
| SEC elution curve of high molecular weight <i>trans-1b</i>                              | S36 |
| IR spectrum of PPP from <i>cis-1a</i>                                                   | S37 |
| IR spectrum of PPP from <i>trans-1b</i>                                                 | S38 |
| <sup>1</sup> H NMR Spectrum of <b>6</b>                                                 | S39 |
| <sup>13</sup> C NMR Spectrum of <b>6</b>                                                | S40 |
| HSQC Spectrum of <b>6</b>                                                               | S41 |
| HMBC Spectrum of <b>6</b>                                                               | S42 |

X-ray Crystal Structure Data for *cis-3a*Table S1. Crystal data and structure refinement for *cis-3a*.

|                                          |                                                                                        |                |
|------------------------------------------|----------------------------------------------------------------------------------------|----------------|
| Empirical formula                        | C <sub>72.50</sub> H <sub>66.50</sub> C <sub>11.50</sub> I <sub>8</sub> O <sub>9</sub> |                |
| Formula weight                           | 2150.13                                                                                |                |
| Temperature                              | 173(1) K                                                                               |                |
| Wavelength                               | 0.71073 Å                                                                              |                |
| Crystal system                           | Monoclinic                                                                             |                |
| Space group                              | <i>P2(1)/m</i>                                                                         |                |
| Unit cell dimensions                     | a = 10.850(2) Å                                                                        | α = 90°        |
|                                          | b = 31.002(6) Å                                                                        | β = 96.637(3)° |
|                                          | c = 11.243(2) Å                                                                        | γ = 90°        |
| Volume                                   | 3756.5(13) Å <sup>3</sup>                                                              |                |
| Z                                        | 2                                                                                      |                |
| Density (calculated)                     | 1.901 g/cm <sup>3</sup>                                                                |                |
| Absorption coefficient                   | 3.409 mm <sup>-1</sup>                                                                 |                |
| F(000)                                   | 2046                                                                                   |                |
| Crystal size                             | 0.50 x 0.32 x 0.32 mm <sup>3</sup>                                                     |                |
| Theta range for data collection          | 1.89 to 27.00°                                                                         |                |
| Index ranges                             | -13 ≤ h ≤ 13, -39 ≤ k ≤ 39, -14 ≤ l ≤ 14                                               |                |
| Reflections collected                    | 41842                                                                                  |                |
| Independent reflections                  | 16334 [R(int) = 0.0202]                                                                |                |
| Completeness to theta = 27.00°           | 99.8 %                                                                                 |                |
| Absorption correction                    | Multi-scan                                                                             |                |
| Refinement method                        | Full-matrix least-squares on <i>F</i> <sup>2</sup>                                     |                |
| Data / restraints / parameters           | 16334 / 1 / 847                                                                        |                |
| Goodness-of-fit on <i>F</i> <sup>2</sup> | 1.093                                                                                  |                |
| Final R indices [I > 2σ(I)]              | R <sub>1</sub> = 0.0302, wR <sub>2</sub> = 0.0905                                      |                |
| R indices (all data)                     | R <sub>1</sub> = 0.0312, wR <sub>2</sub> = 0.0911                                      |                |
| Absolute structure parameter             | 0.321(15)                                                                              |                |
| Largest diff. peak and hole              | 1.614/-0.599 e Å <sup>-3</sup>                                                         |                |

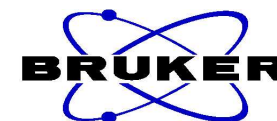

Current Data Parameters  
 NAME DPA-030-45-47  
 EXPNO 1  
 PROCNO 1

F2 - Acquisition Parameter  
 Date\_ 20110102  
 Time 19.24  
 INSTRUM spect  
 PROBHD 5 mm Dual 13C/  
 PULPROG zg  
 TD 32768  
 SOLVENT CDC13  
 NS 64  
 DS 0  
 SWH 4194.631 Hz  
 FIDRES 0.128010 Hz  
 AQ 3.9059956 se  
 RG 456.1  
 DW 119.200 us  
 DE 6.00 us  
 TE 296.2 K  
 D1 0.10000000 se  
 TD0 1

===== CHANNEL f1 =====  
 NUC1 1H  
 P1 9.00 us  
 PL1 -3.00 dB  
 SFO1 300.1319000 MH

F2 - Processing parameters  
 SI 32768  
 SF 300.1300059 MH  
 WDW EM  
 SSB 0  
 LB 0.00 Hz  
 GB 0  
 PC 0.50

7.716  
7.708  
7.702  
7.686  
7.680  
7.672  
7.261  
7.253  
7.245  
7.238  
7.223  
7.216  
7.208  
6.026

2.186  
2.167  
2.149  
2.145  
2.134  
2.130  
2.104  
2.044  
1.894  
1.879  
1.853  
1.849  
1.837  
1.834  
1.816  
1.802  
1.611

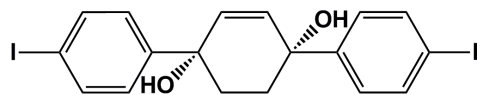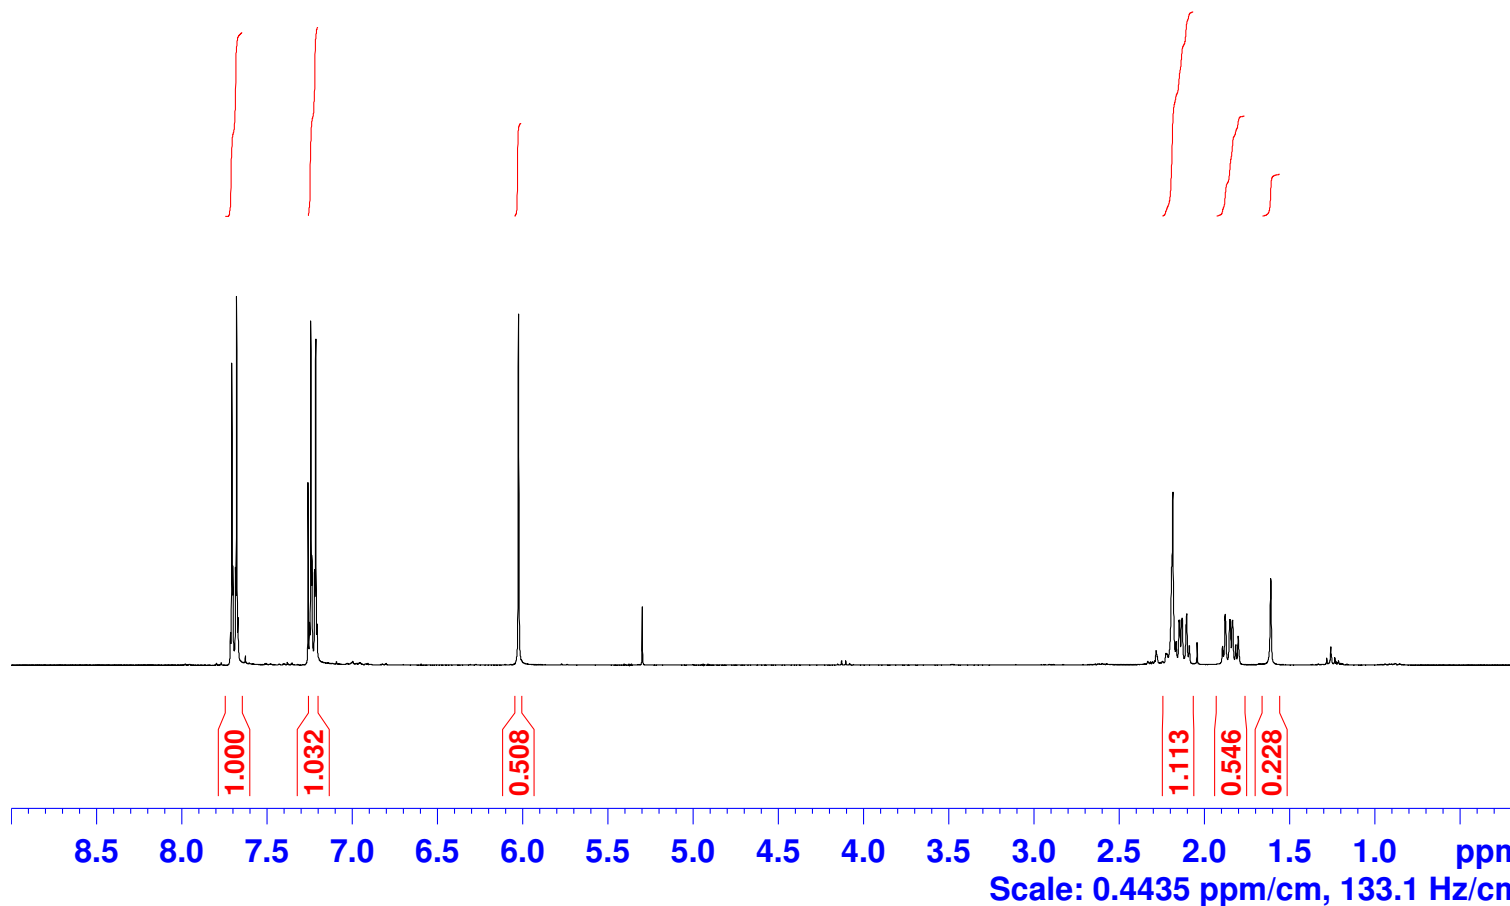

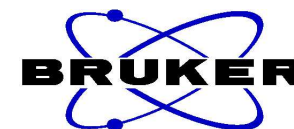

Current Data Parameters  
 NAME DPA-030-45-47  
 EXPNO 2  
 PROCNO 1

F2 - Acquisition Parameter  
 Date\_ 20110102  
 Time 23.48  
 INSTRUM spect  
 PROBHD 5 mm Dual 13C/  
 PULPROG zgdc  
 TD 32768  
 SOLVENT CDC13  
 NS 2000  
 DS 0  
 SWH 19723.865 Hz  
 FIDRES 0.601925 Hz  
 AQ 0.8307188 se  
 RG 5792.6  
 DW 25.350 us  
 DE 9.46 us  
 TE 296.2 K  
 D1 0.1000000 se  
 d11 0.0300000 se  
 TD0 1

==== CHANNEL f1 =====  
 NUC1 13C  
 P1 3.00 us  
 PL1 -5.00 dB  
 SFO1 75.4759867 MH

==== CHANNEL f2 =====  
 CPDPRG2 waltz16  
 NUC2 1H  
 PCPD2 100.00 us  
 PL2 -6.00 dB  
 PL12 12.00 dB  
 SFO2 300.1312000 MH

F2 - Processing parameters  
 SI 32768  
 SF 75.4677497 MH  
 WDW EM  
 SSB 0  
 LB 2.00 Hz  
 GB 0  
 PC 1.00

145.554  
 137.513  
 134.397  
 127.490  
 93.234  
 72.138  
 36.117

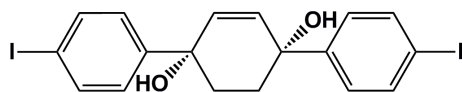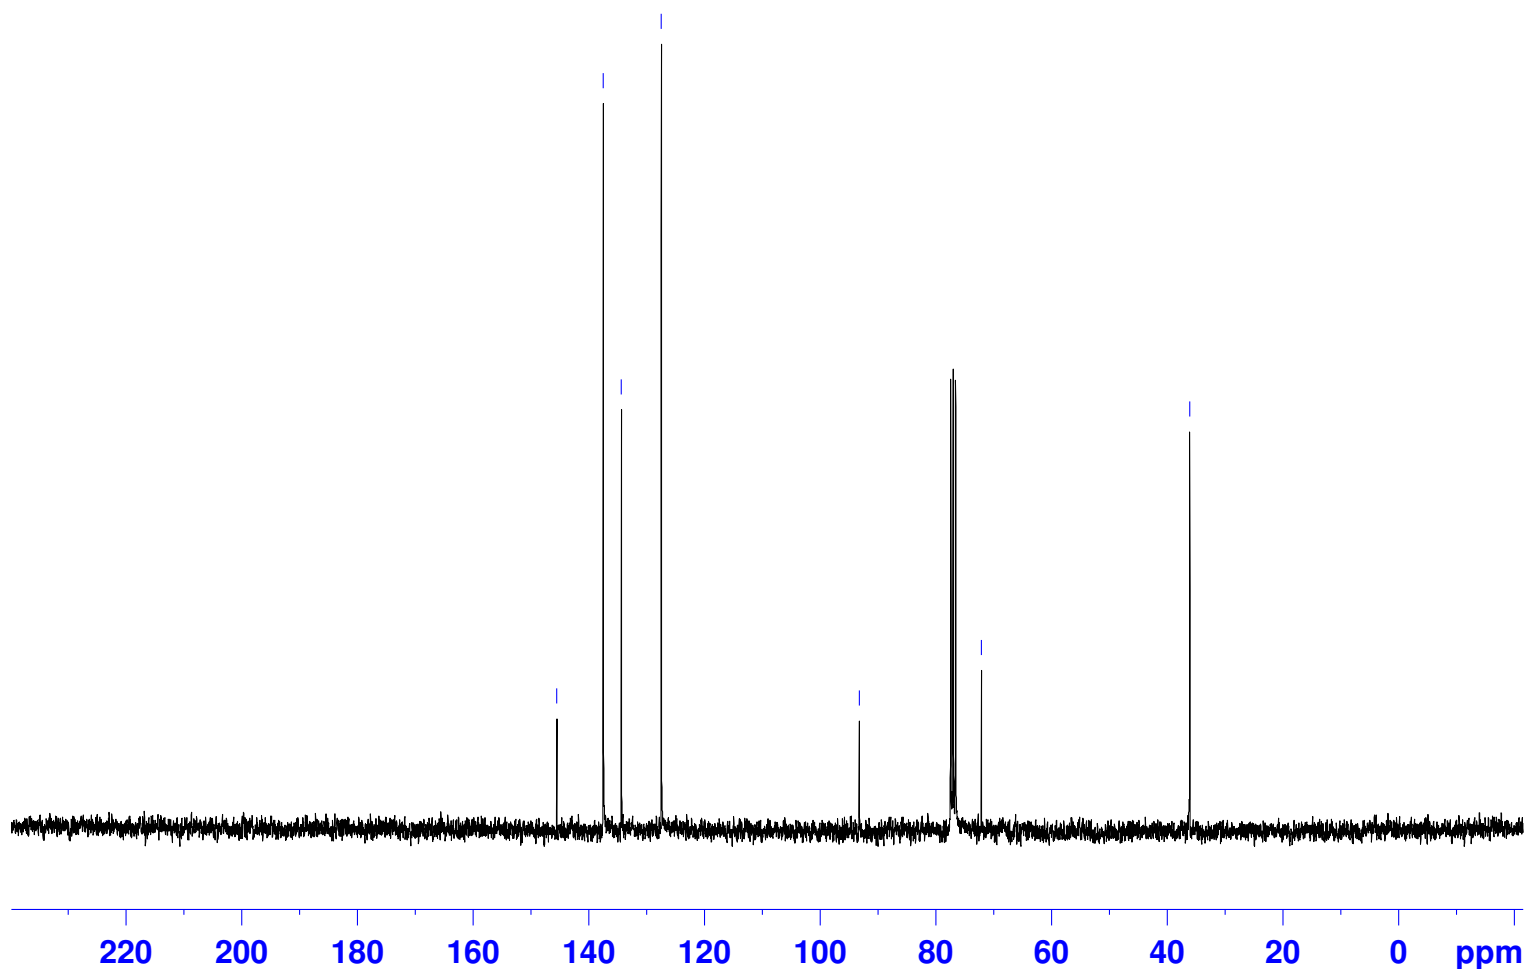

Scale: 13.07 ppm/cm, 986.2 Hz/cm

Sample: DPA-107/25-43  
Size: 5.0300 mg  
Method: Ramp  
Comment: N2

# TGA

S6

File: C:\...TGA analysis\fd18may11-100.TGA  
Operator: Bruria  
Run Date: 18-May-2011 20:46  
Instrument: TGA Q500 V6.4 Build 193

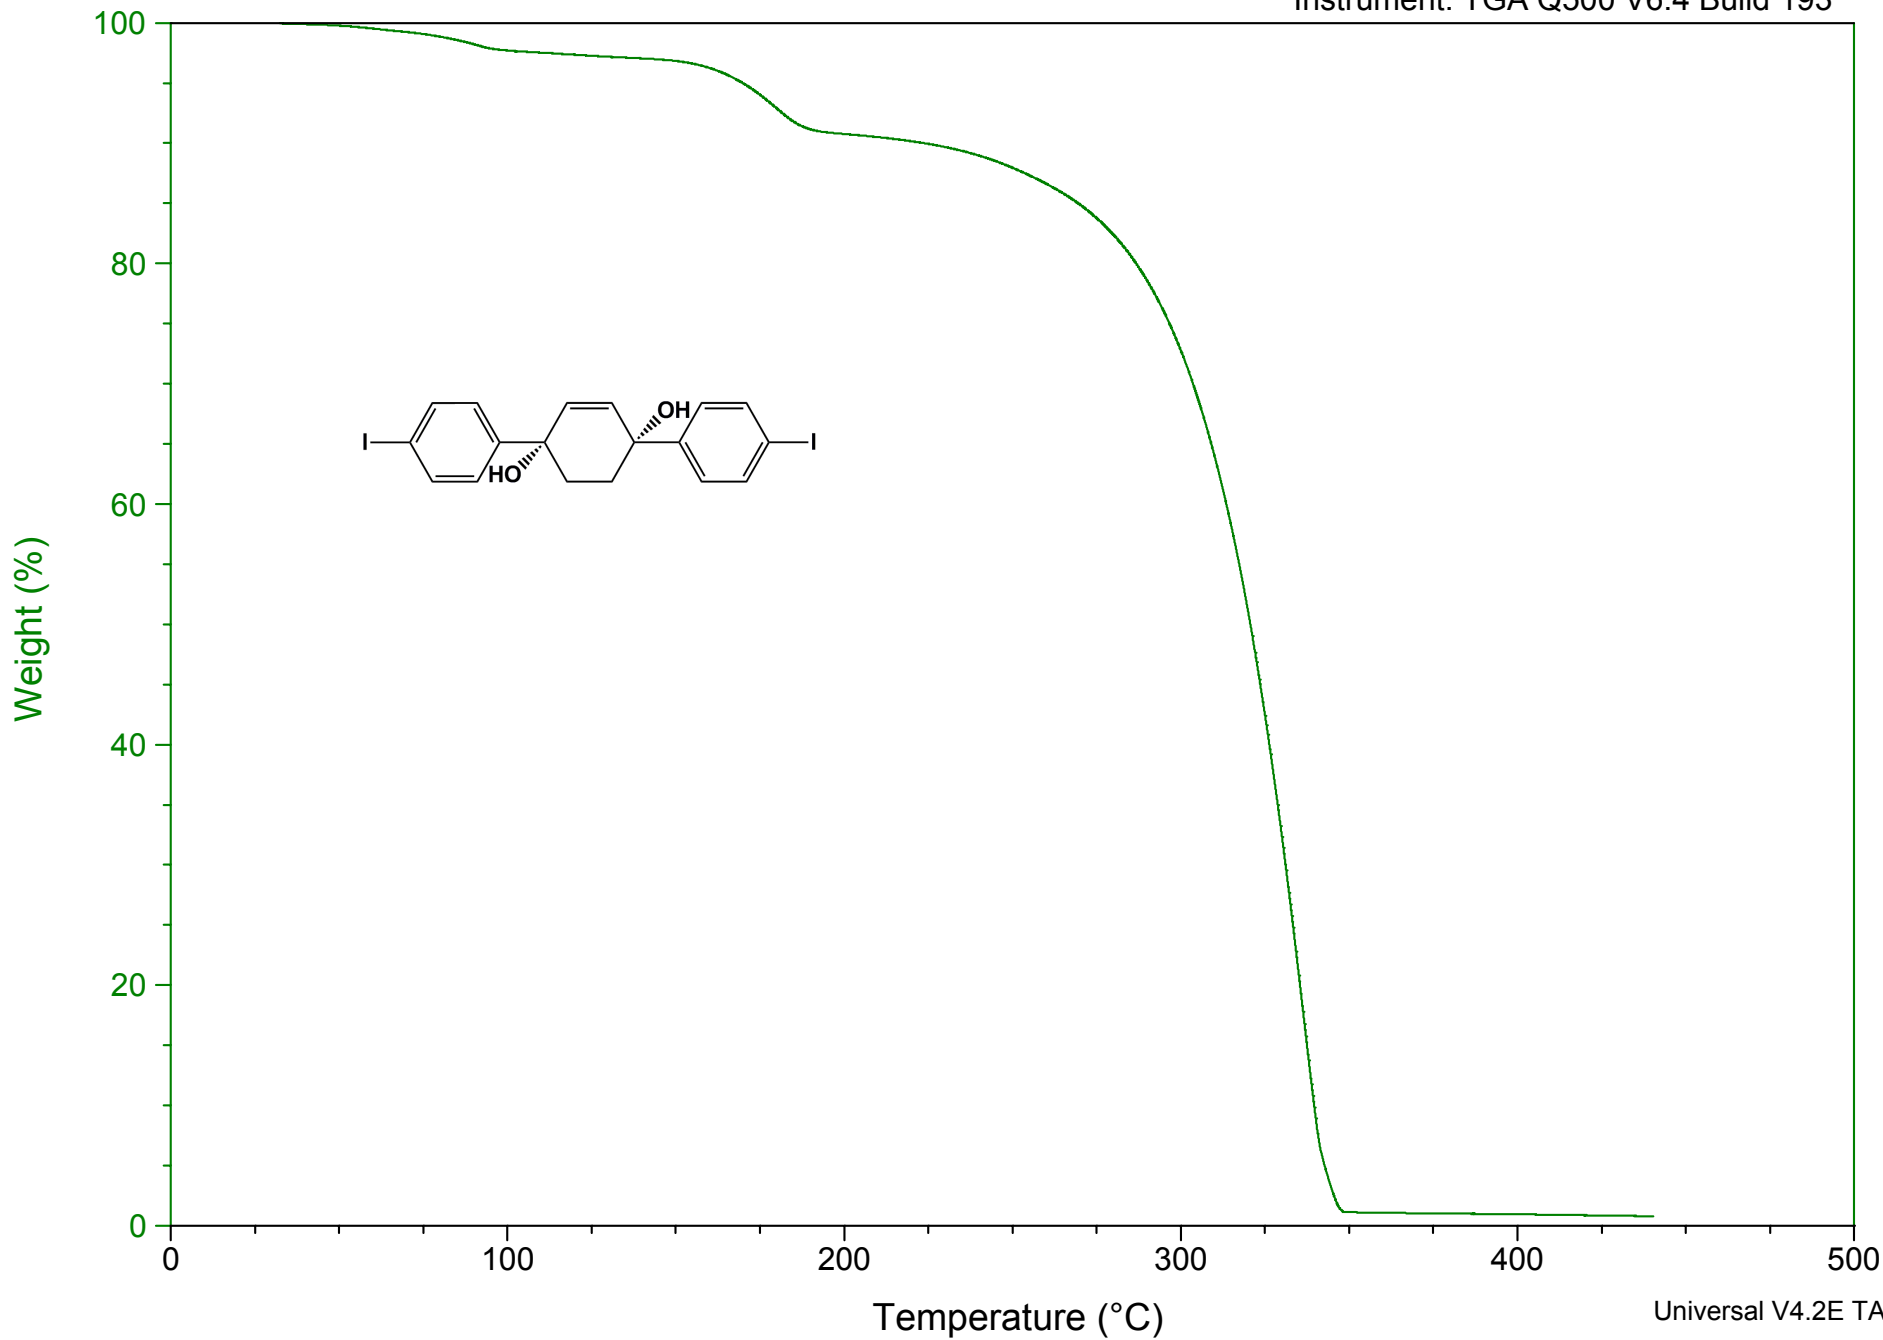

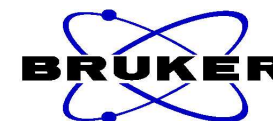

Current Data Parameters  
 NAME DPA-030-25-26  
 EXPNO 1  
 PROCNO 1

F2 - Acquisition Parameter  
 Date\_ 20110102  
 Time 19.33  
 INSTRUM spect  
 PROBHD 5 mm Dual 13C/  
 PULPROG zg  
 TD 32768  
 SOLVENT CDC13  
 NS 64  
 DS 0  
 SWH 4194.631 Hz  
 FIDRES 0.128010 Hz  
 AQ 3.9059956 se  
 RG 724.1  
 DW 119.200 us  
 DE 6.00 us  
 TE 296.2 K  
 D1 0.10000000 se  
 TD0 1

===== CHANNEL f1 =====  
 NUC1 1H  
 P1 9.00 us  
 PL1 -3.00 dB  
 SFO1 300.1319000 MH

F2 - Processing parameters  
 SI 32768  
 SF 300.1300059 MH  
 WDW EM  
 SSB 0  
 LB 0.00 Hz  
 GB 0  
 PC 0.50

7.727  
7.719  
7.713  
7.697  
7.691  
7.683  
7.299  
7.292  
7.285  
7.269  
7.261  
5.999

2.168  
2.150  
2.144  
2.136  
2.116  
2.099  
1.979  
1.966  
1.962  
1.957  
1.955  
1.941  
1.922  
1.897  
1.890  
1.872

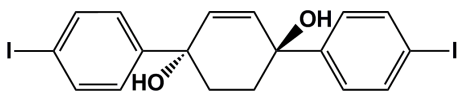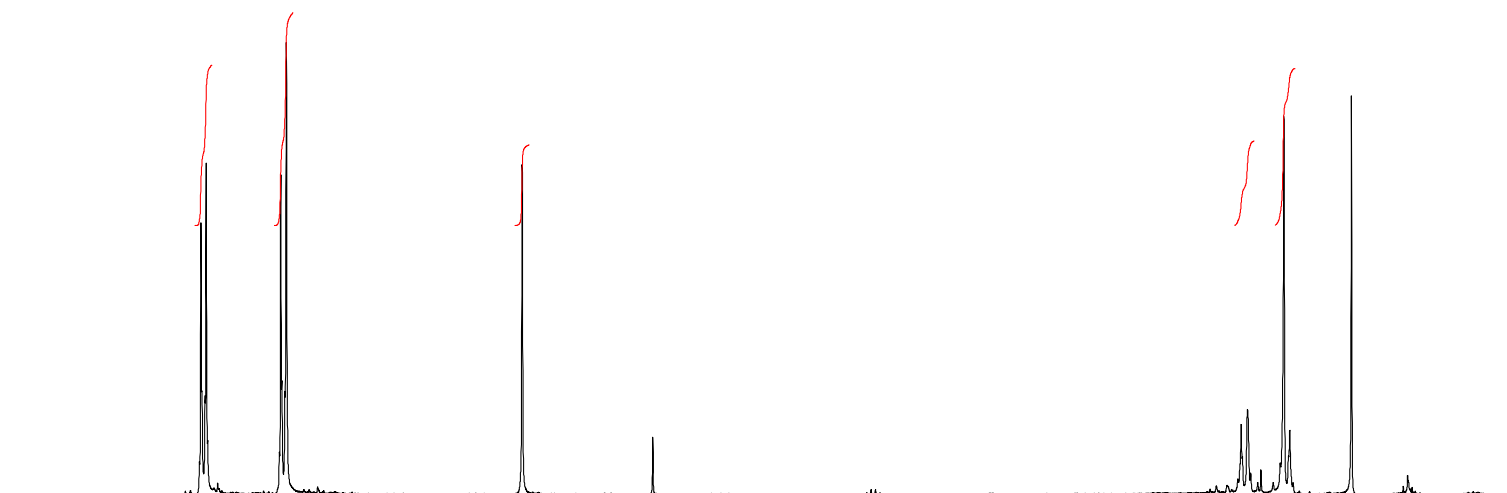

8.5 8.0 7.5 7.0 6.5 6.0 5.5 5.0 4.5 4.0 3.5 3.0 2.5 2.0 1.5 ppm  
 Scale: 0.4045 ppm/cm, 121.4 Hz/cm



Current Data Parameters  
 NAME DPA-030-25-26  
 EXPNO 2  
 PROCNO 1

F2 - Acquisition Parameter  
 Date\_ 20110102  
 Time 20.00  
 INSTRUM spect  
 PROBHD 5 mm Dual 13C/  
 PULPROG zgdc  
 TD 32768  
 SOLVENT CDC13  
 NS 2634  
 DS 0  
 SWH 19723.865 Hz  
 FIDRES 0.601925 Hz  
 AQ 0.8307188 se  
 RG 5792.6  
 DW 25.350 us  
 DE 9.46 us  
 TE 296.2 K  
 D1 0.10000000 se  
 d11 0.03000000 se  
 TD0 1

==== CHANNEL f1 =====  
 NUC1 13C  
 P1 3.00 us  
 PL1 -5.00 dB  
 SFO1 75.4759867 MH

==== CHANNEL f2 =====  
 CPDPRG2 waltz16  
 NUC2 1H  
 PCPD2 100.00 us  
 PL2 -6.00 dB  
 PL12 12.00 dB  
 SFO2 300.1312000 MH

F2 - Processing parameters  
 SI 32768  
 SF 75.4677497 MH  
 WDW EM  
 SSB 0  
 LB 2.00 Hz  
 GB 0  
 PC 1.00

146.455  
 137.423  
 134.159  
 127.453

93.021

71.637

35.923

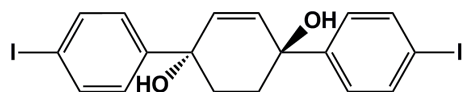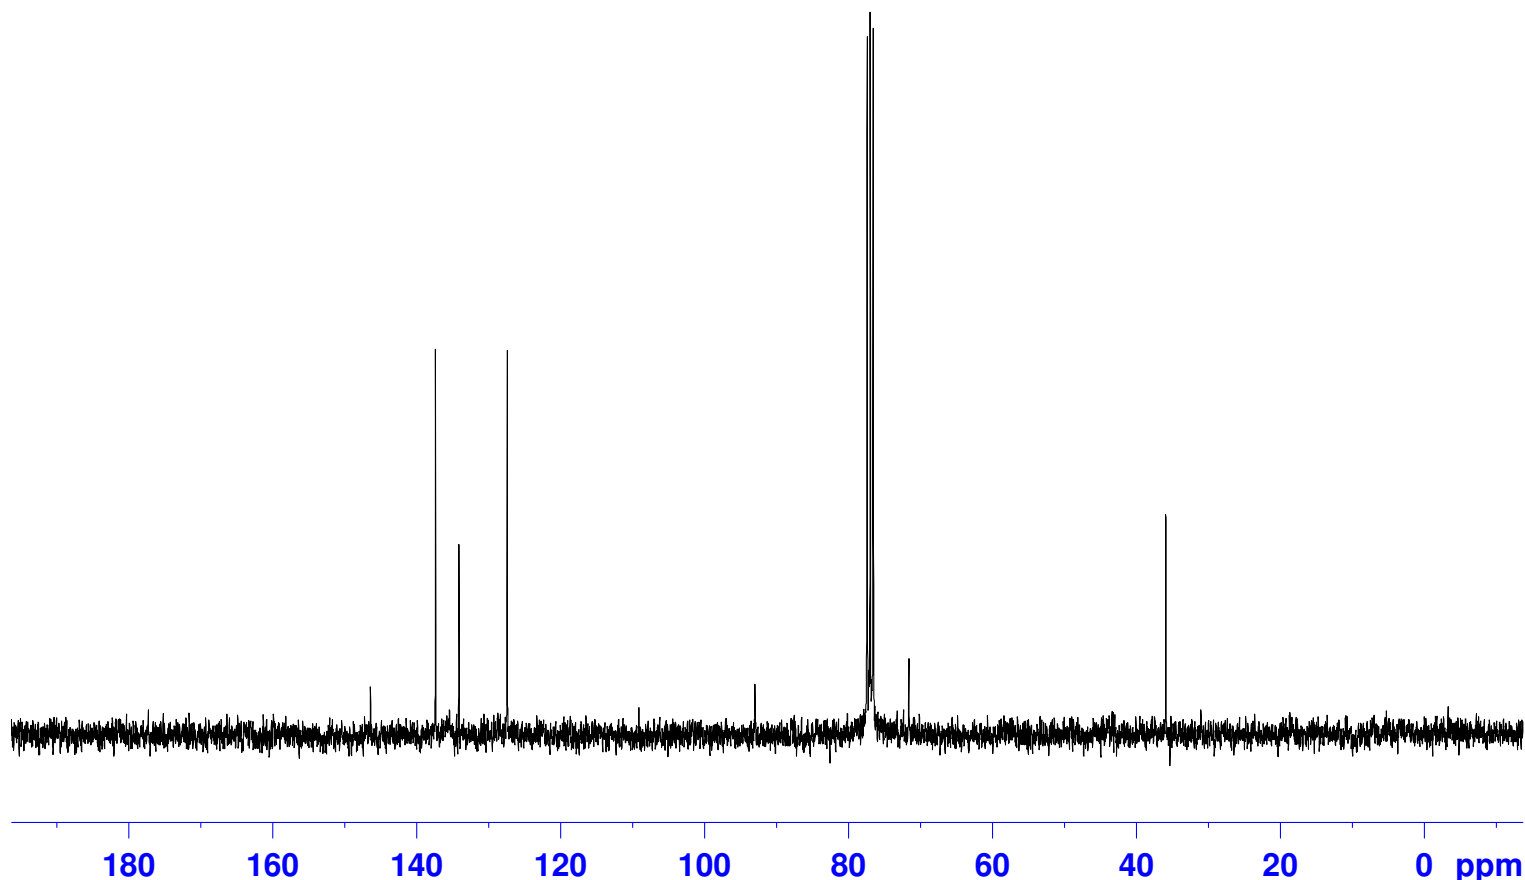

Scale: 10.5 ppm/cm, 792.6 Hz/cm



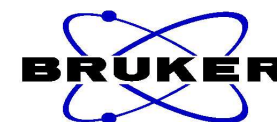

Current Data Parameters  
 NAME DPA-028-1-19-MeOH  
 EXPNO 1  
 PROCNO 1

F2 - Acquisition Parameter  
 Date\_ 20101231  
 Time 21.16  
 INSTRUM spect  
 PROBHD 5 mm Dual 13C/  
 PULPROG zg  
 TD 32768  
 SOLVENT MeOD  
 NS 24  
 DS 0  
 SWH 4194.631 Hz  
 FIDRES 0.128010 Hz  
 AQ 3.9059956 se  
 RG 645.1  
 DW 119.200 us  
 DE 6.00 us  
 TE 296.2 K  
 D1 0.10000000 se  
 TD0 1

===== CHANNEL f1 =====  
 NUC1 1H  
 P1 9.00 us  
 PL1 -3.00 dB  
 SFO1 300.1319000 MH

F2 - Processing parameters  
 SI 32768  
 SF 300.1300045 MH  
 WDW EM  
 SSB 0  
 LB 0.00 Hz  
 GB 0  
 PC 0.50

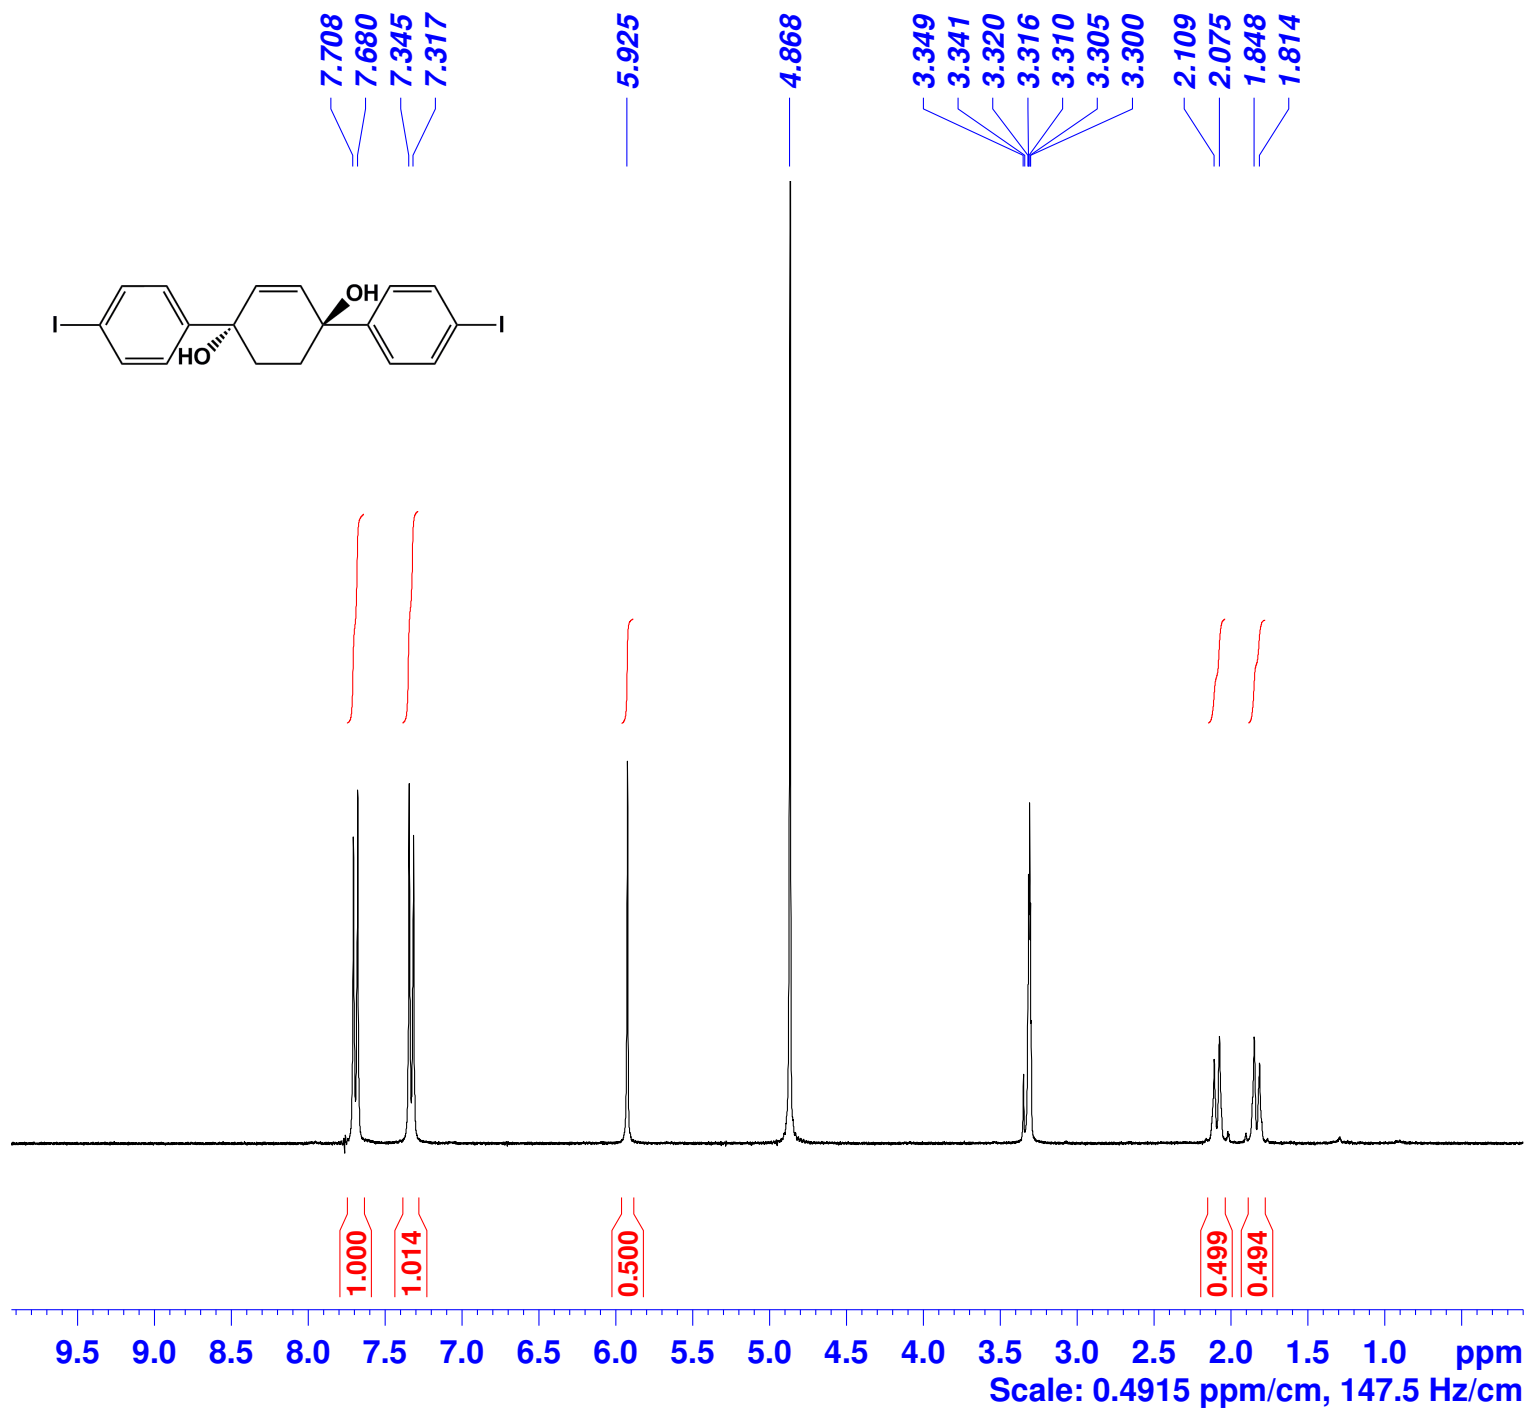



Current Data Parameters  
 NAME DPA-028-1-19-MeOH  
 EXPNO 2  
 PROCNO 1

F2 - Acquisition Parameter  
 Date\_ 20101231  
 Time 21.34  
 INSTRUM spect  
 PROBHD 5 mm Dual 13C/  
 PULPROG zgdc  
 TD 32768  
 SOLVENT MeOD  
 NS 800  
 DS 0  
 SWH 19723.865 Hz  
 FIDRES 0.601925 Hz  
 AQ 0.8307188 se  
 RG 5792.6  
 DW 25.350 us  
 DE 9.46 us  
 TE 296.2 K  
 D1 0.10000000 se  
 d11 0.03000000 se  
 TD0 1

==== CHANNEL f1 =====  
 NUC1 13C  
 P1 3.00 us  
 PL1 -5.00 dB  
 SFO1 75.4759867 MH

==== CHANNEL f2 =====  
 CPDPRG2 waltz16  
 NUC2 1H  
 PCPD2 100.00 us  
 PL2 -6.00 dB  
 PL12 12.00 dB  
 SFO2 300.1312000 MH

F2 - Processing parameters  
 SI 32768  
 SF 75.4677497 MH  
 WDW EM  
 SSB 0  
 LB 2.00 Hz  
 GB 0  
 PC 1.00

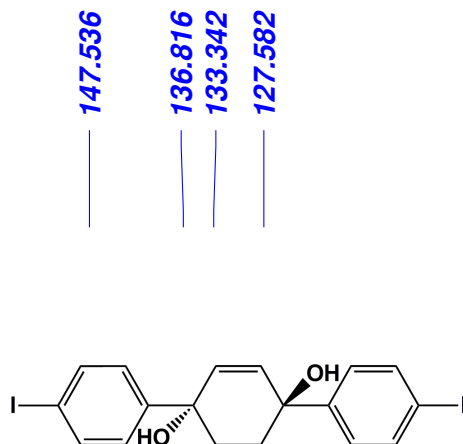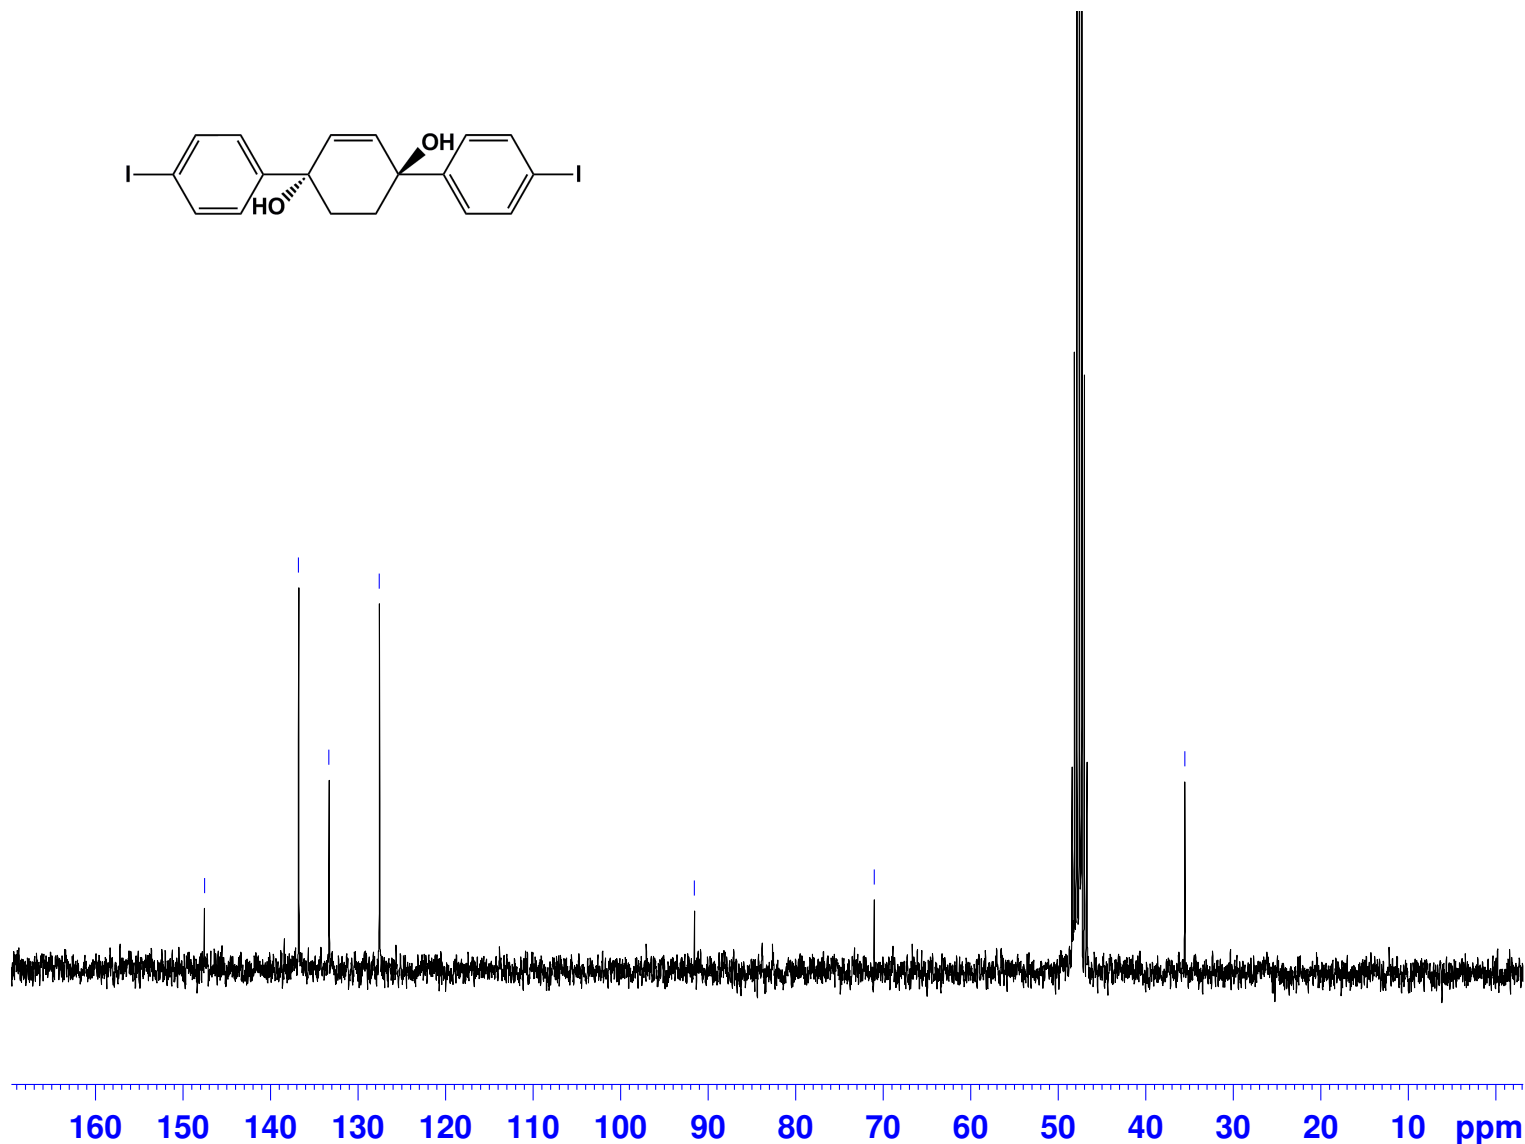

Scale: 8.637 ppm/cm, 651.8 Hz/cm

Sample: DPA-63/11-14  
Size: 5.9210 mg  
Method: Ramp  
Comment: N2

# TGA

File: C:\...TGA analysis\fd18may11-101.TGA  
Operator: Bruria  
Run Date: 18-May-2011 23:29  
Instrument: TGA Q500 V6.4 Build 193

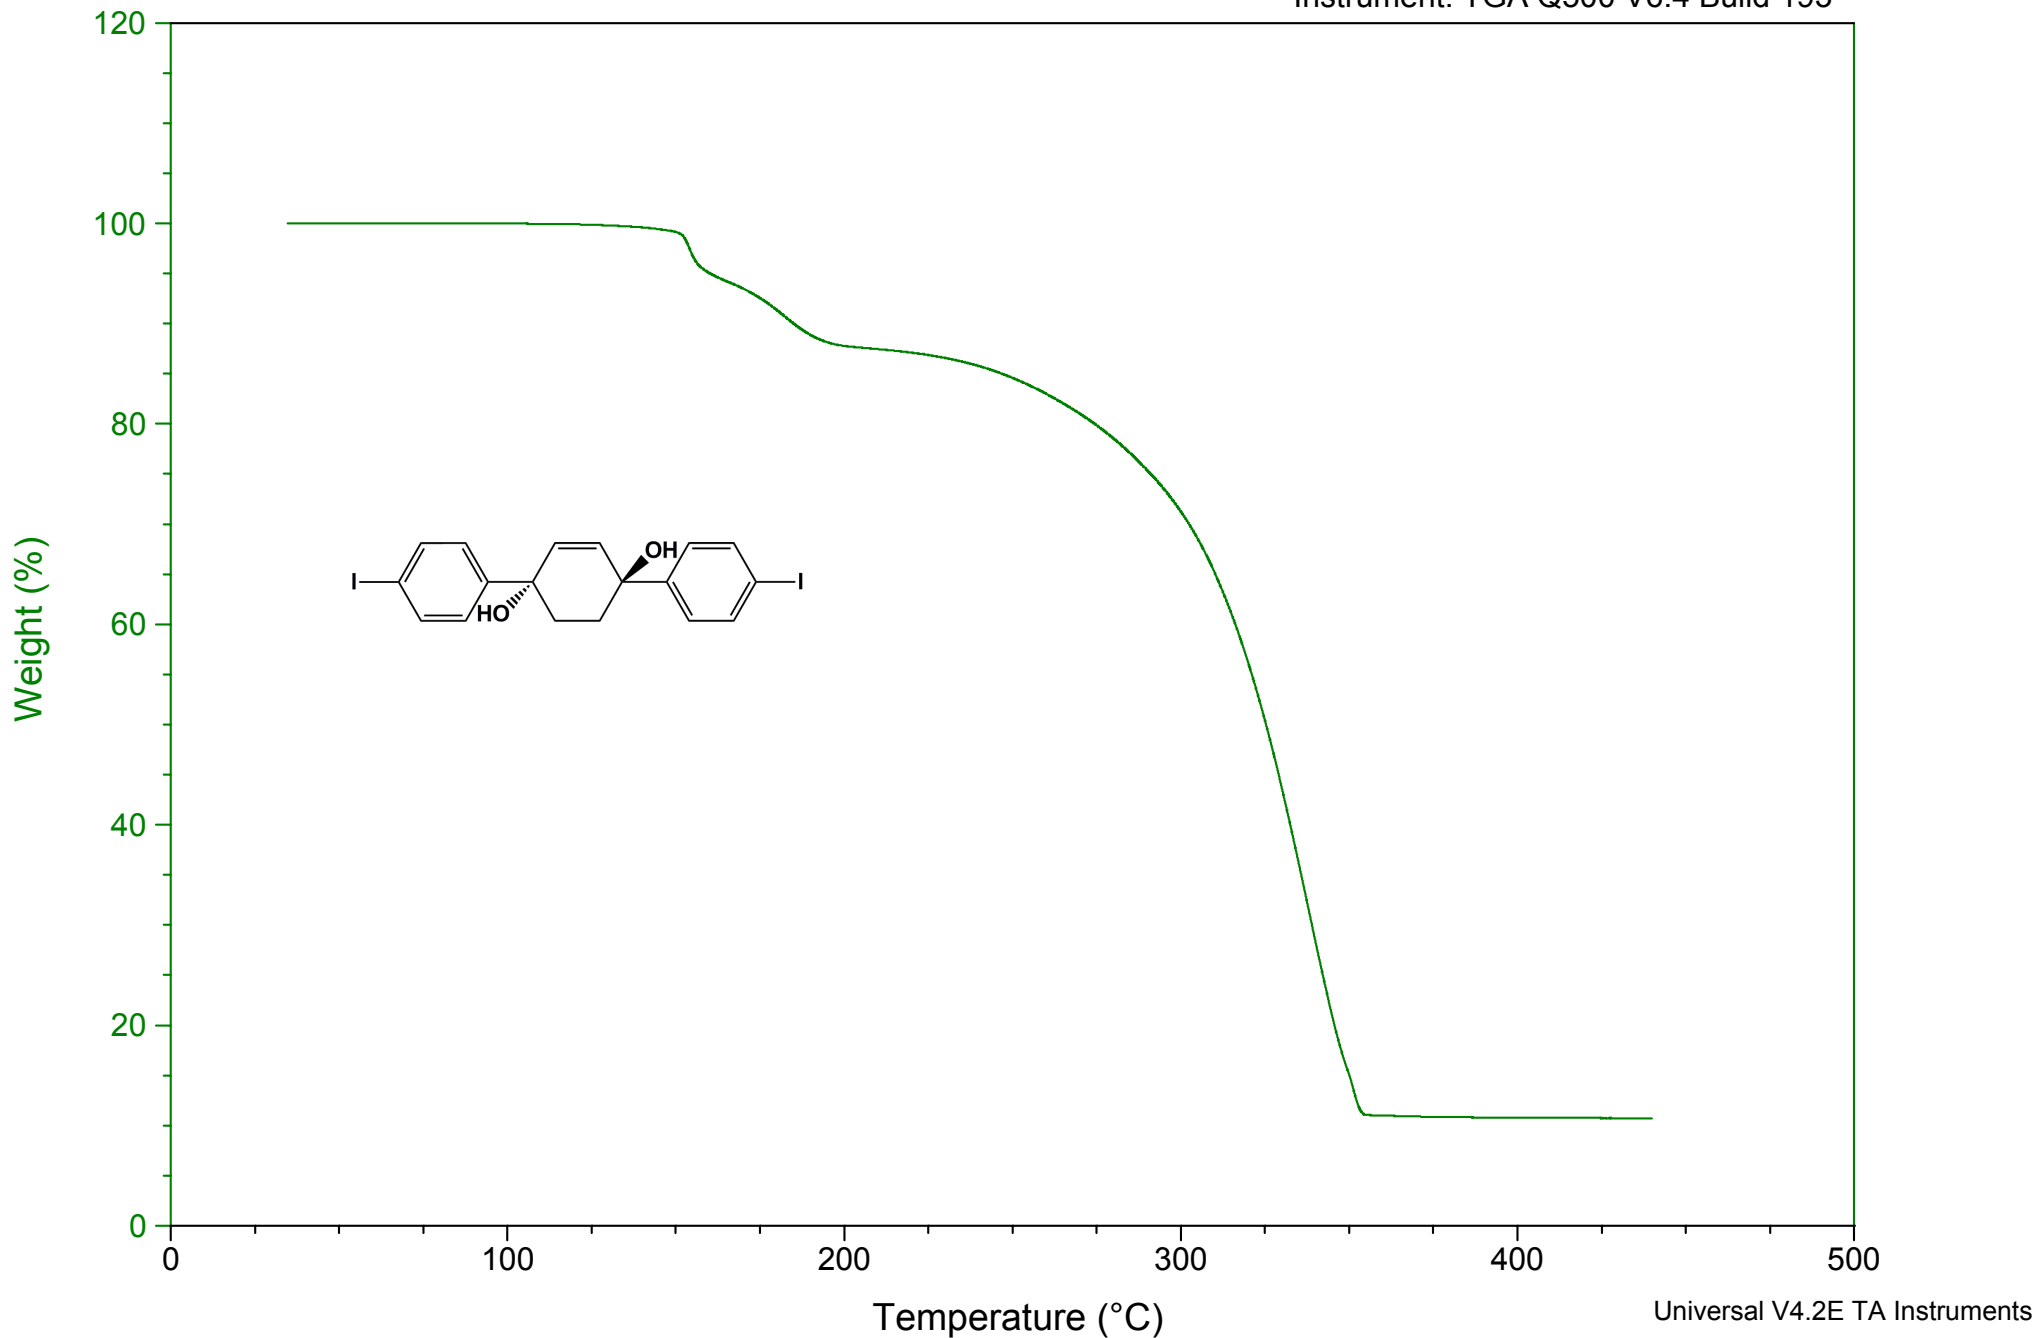

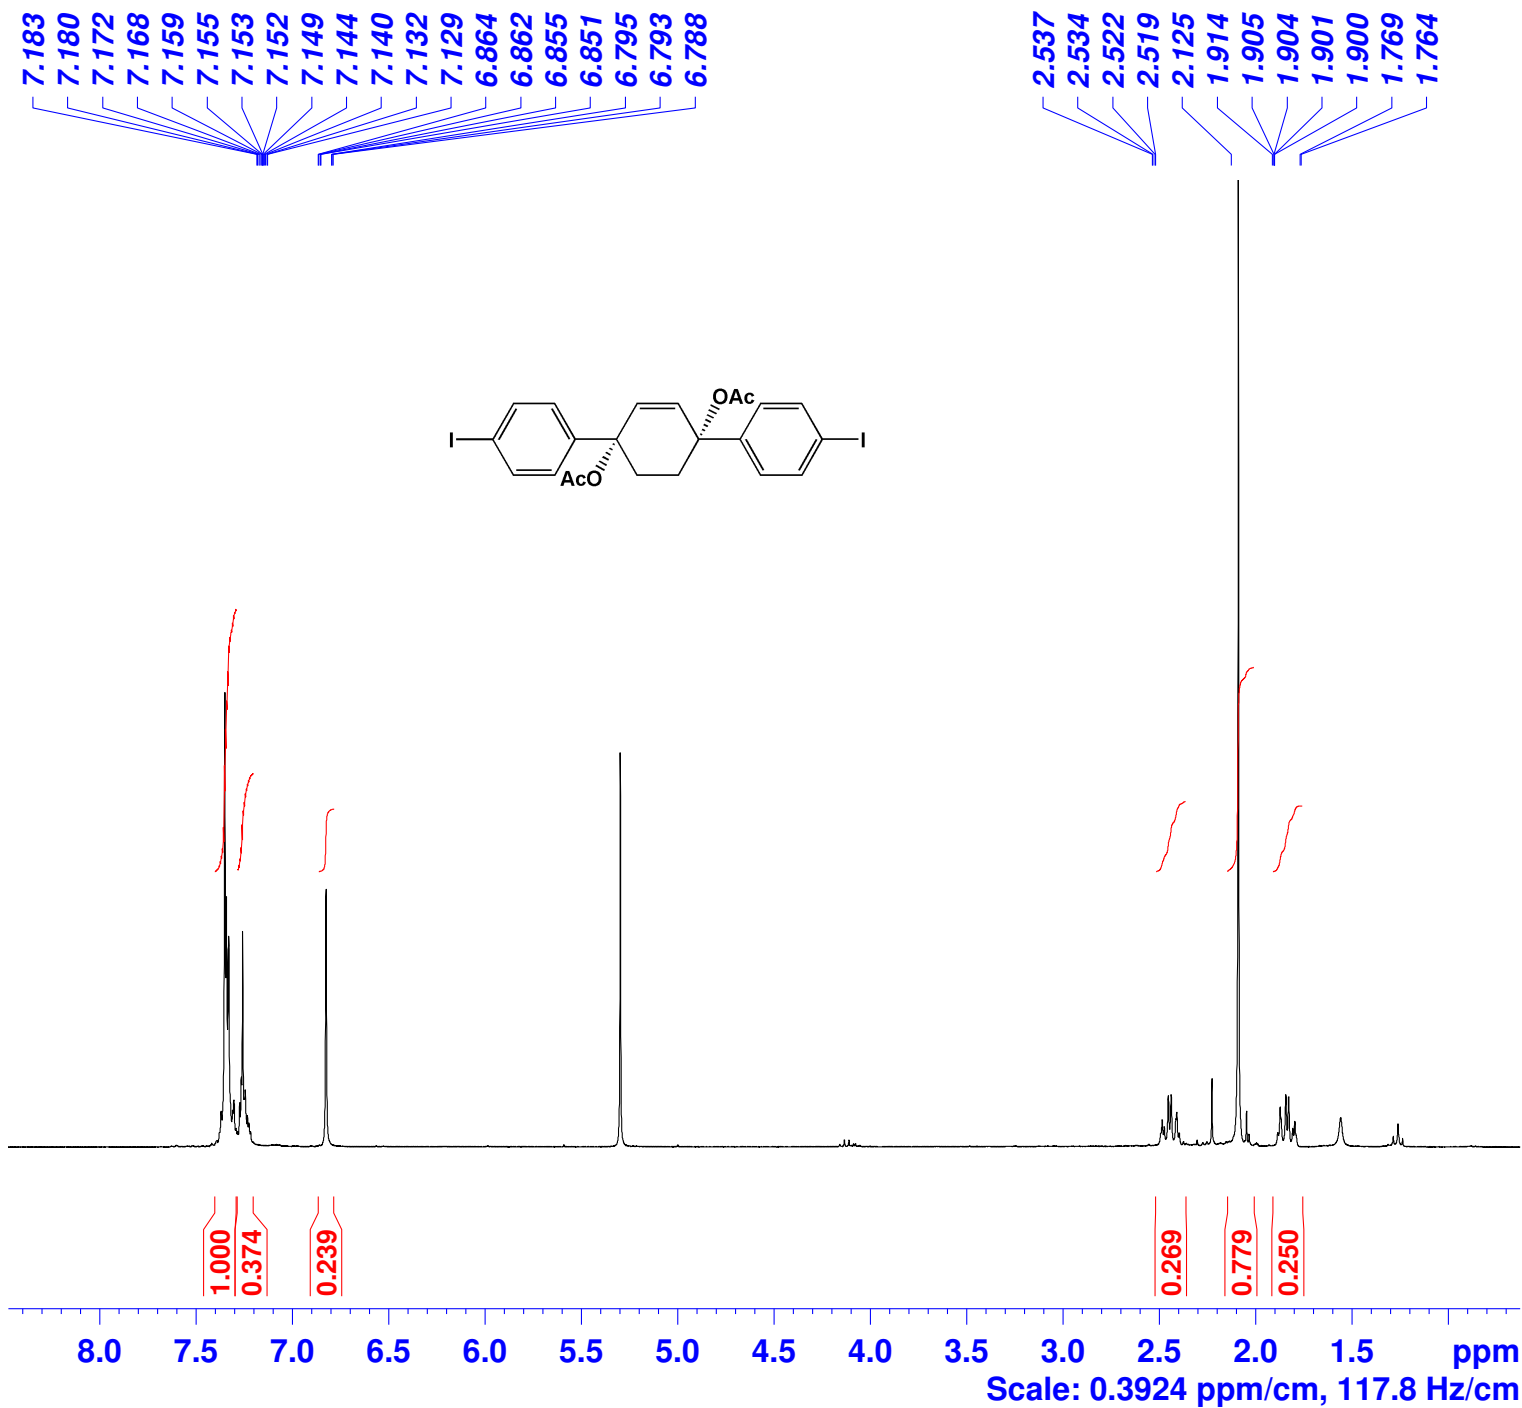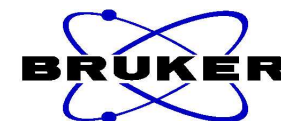

Current Data Parameters  
 NAME DPA-diacetate-cru  
 EXPNO 2  
 PROCNO 1

F2 - Acquisition Parameter  
 Date\_ 20110111  
 Time 13.26  
 INSTRUM spect  
 PROBHD 5 mm Dual 13C/  
 PULPROG zg  
 TD 32768  
 SOLVENT CDC13  
 NS 124  
 DS 0  
 SWH 4194.631 Hz  
 FIDRES 0.128010 Hz  
 AQ 3.9059956 se  
 RG 114  
 DW 119.200 us  
 DE 6.00 us  
 TE 295.2 K  
 D1 0.10000000 se  
 TD0 1

===== CHANNEL f1 =====  
 NUC1 1H  
 P1 9.00 us  
 PL1 -3.00 dB  
 SFO1 300.1319000 MH

F2 - Processing parameters  
 SI 32768  
 SF 300.1300059 MH  
 WDW EM  
 SSB 0  
 LB 0.00 Hz  
 GB 0  
 PC 0.50

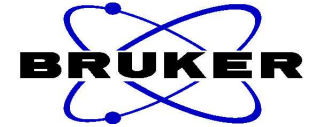

Current Data Parameters  
 NAME DPA-diacetate-cru  
 EXPNO 3  
 PROCNO 1

F2 - Acquisition Parameter  
 Date\_ 20110111  
 Time 19.28  
 INSTRUM spect  
 PROBHD 5 mm Dual 13C/  
 PULPROG zgdc  
 TD 32768  
 SOLVENT CDC13  
 NS 5000  
 DS 0  
 SWH 19723.865 Hz  
 FIDRES 0.601925 Hz  
 AQ 0.8307188 se  
 RG 8192  
 DW 25.350 us  
 DE 9.46 us  
 TE 296.2 K  
 D1 0.1000000 se  
 d11 0.0300000 se  
 TD0 1

==== CHANNEL f1 =====  
 NUC1 13C  
 P1 3.00 us  
 PL1 -5.00 dB  
 SFO1 75.4759867 MH

==== CHANNEL f2 =====  
 CPDPRG2 waltz16  
 NUC2 1H  
 PCPD2 100.00 us  
 PL2 -6.00 dB  
 PL12 12.00 dB  
 SFO2 300.1312000 MH

F2 - Processing parameters  
 SI 32768  
 SF 75.4677497 MH  
 WDW EM  
 SSB 0  
 LB 2.00 Hz  
 GB 0  
 PC 1.00

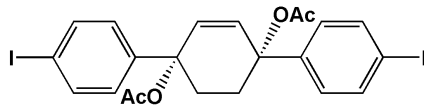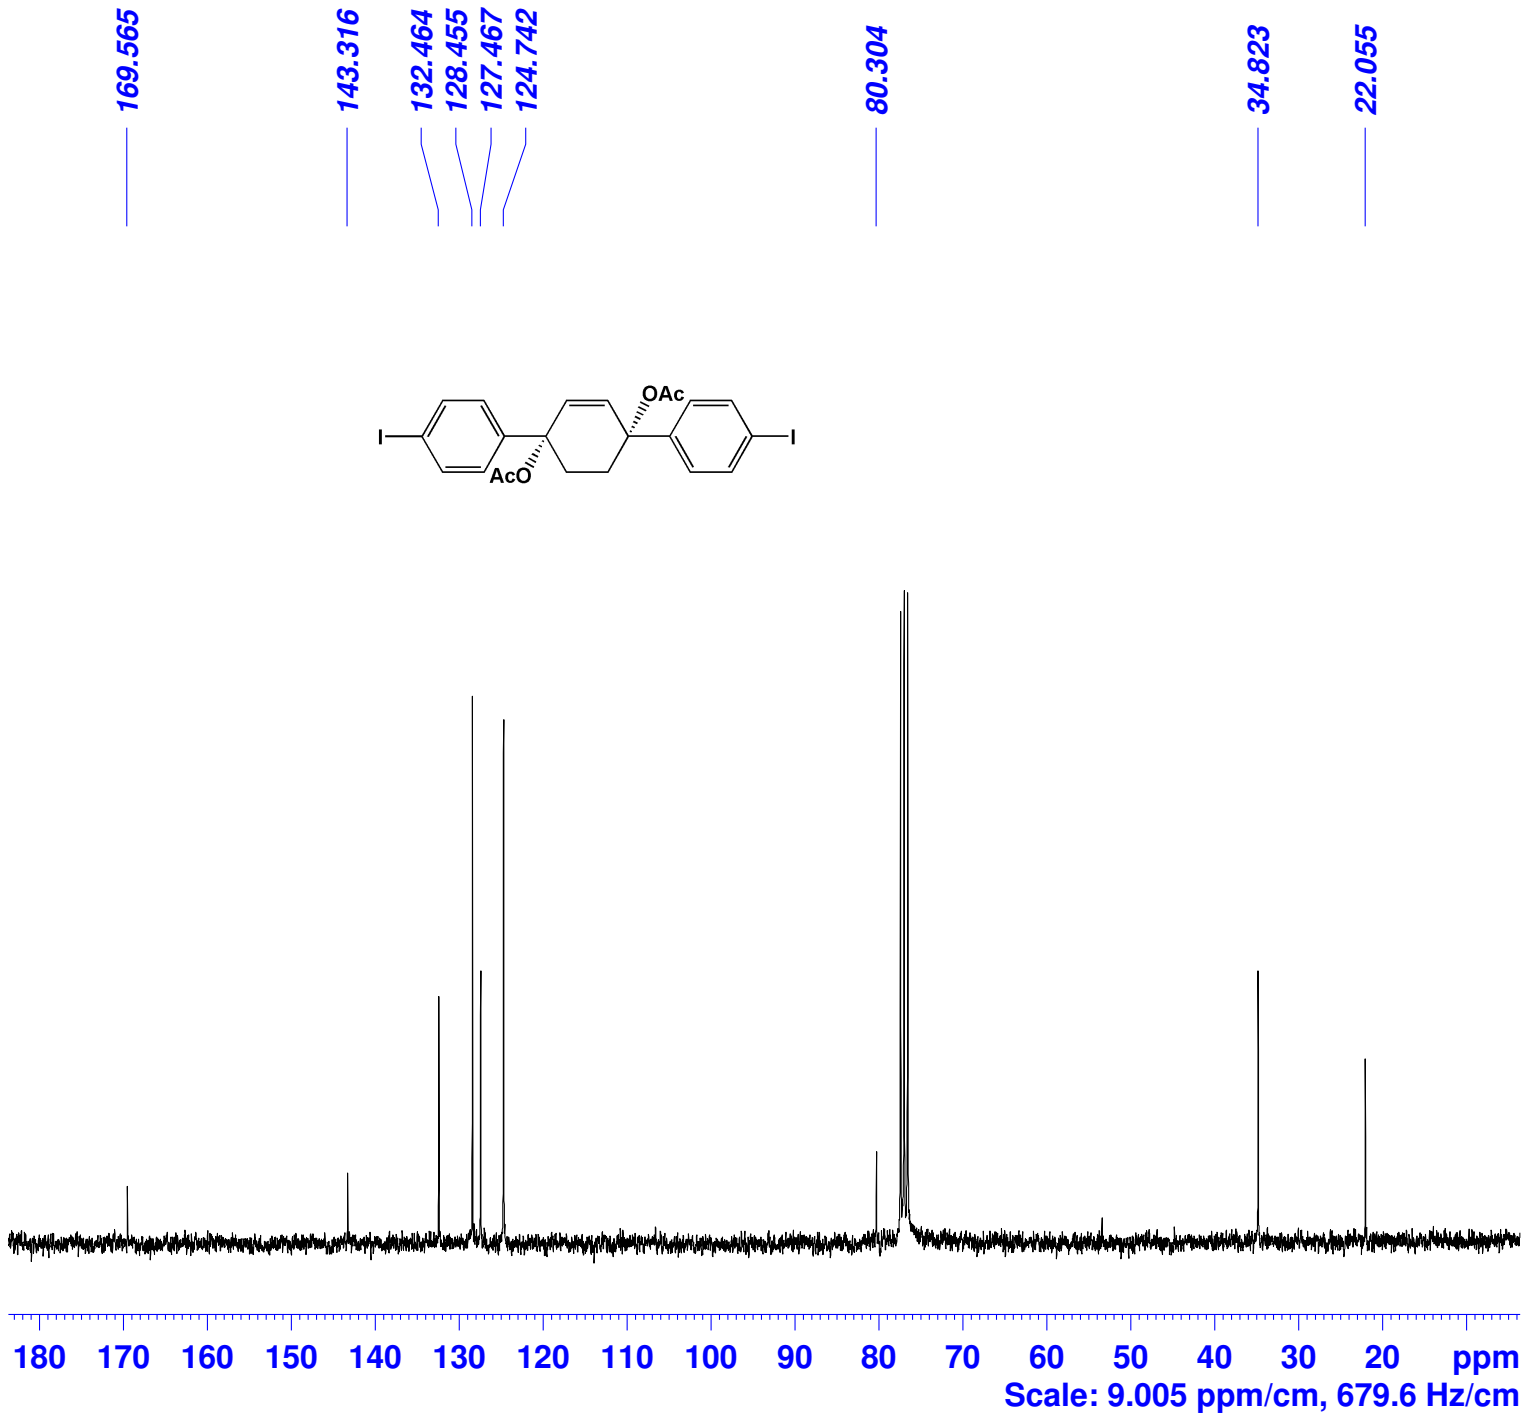

7.715  
7.707  
7.701  
7.685  
7.678  
7.670  
7.103  
7.095  
7.088  
7.073  
7.066  
7.058  
6.820

2.171  
2.165  
2.147  
2.133  
2.118  
2.107  
2.092  
2.081  
2.066  
2.061  
2.032

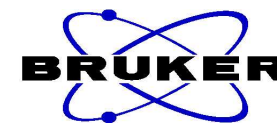

Current Data Parameters  
NAME DPA-129 trans diacetate fir  
EXPNO 1  
PROCNO 1

F2 - Acquisition Parameters  
Date\_ 20110911  
Time 16.34  
INSTRUM spect  
PROBHD 5 mm Dual 13C/  
PULPROG zg  
TD 32768  
SOLVENT CDCl3  
NS 64  
DS 0  
SWH 4194.631 Hz  
FIDRES 0.128010 Hz  
AQ 3.9059956 sec  
RG 912.3  
DW 119.200 usec  
DE 6.00 usec  
TE 303.2 K  
D1 0.10000000 sec  
TD0 1

===== CHANNEL f1 =====  
NUC1 1H  
P1 9.00 usec  
PL1 -3.00 dB  
SFO1 300.1319000 MHz

F2 - Processing parameters  
SI 32768  
SF 300.1300059 MHz  
WDW EM  
SSB 0  
LB 0.00 Hz  
GB 0  
PC 0.50

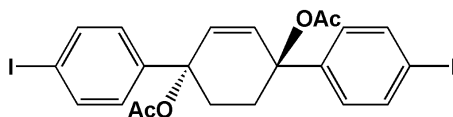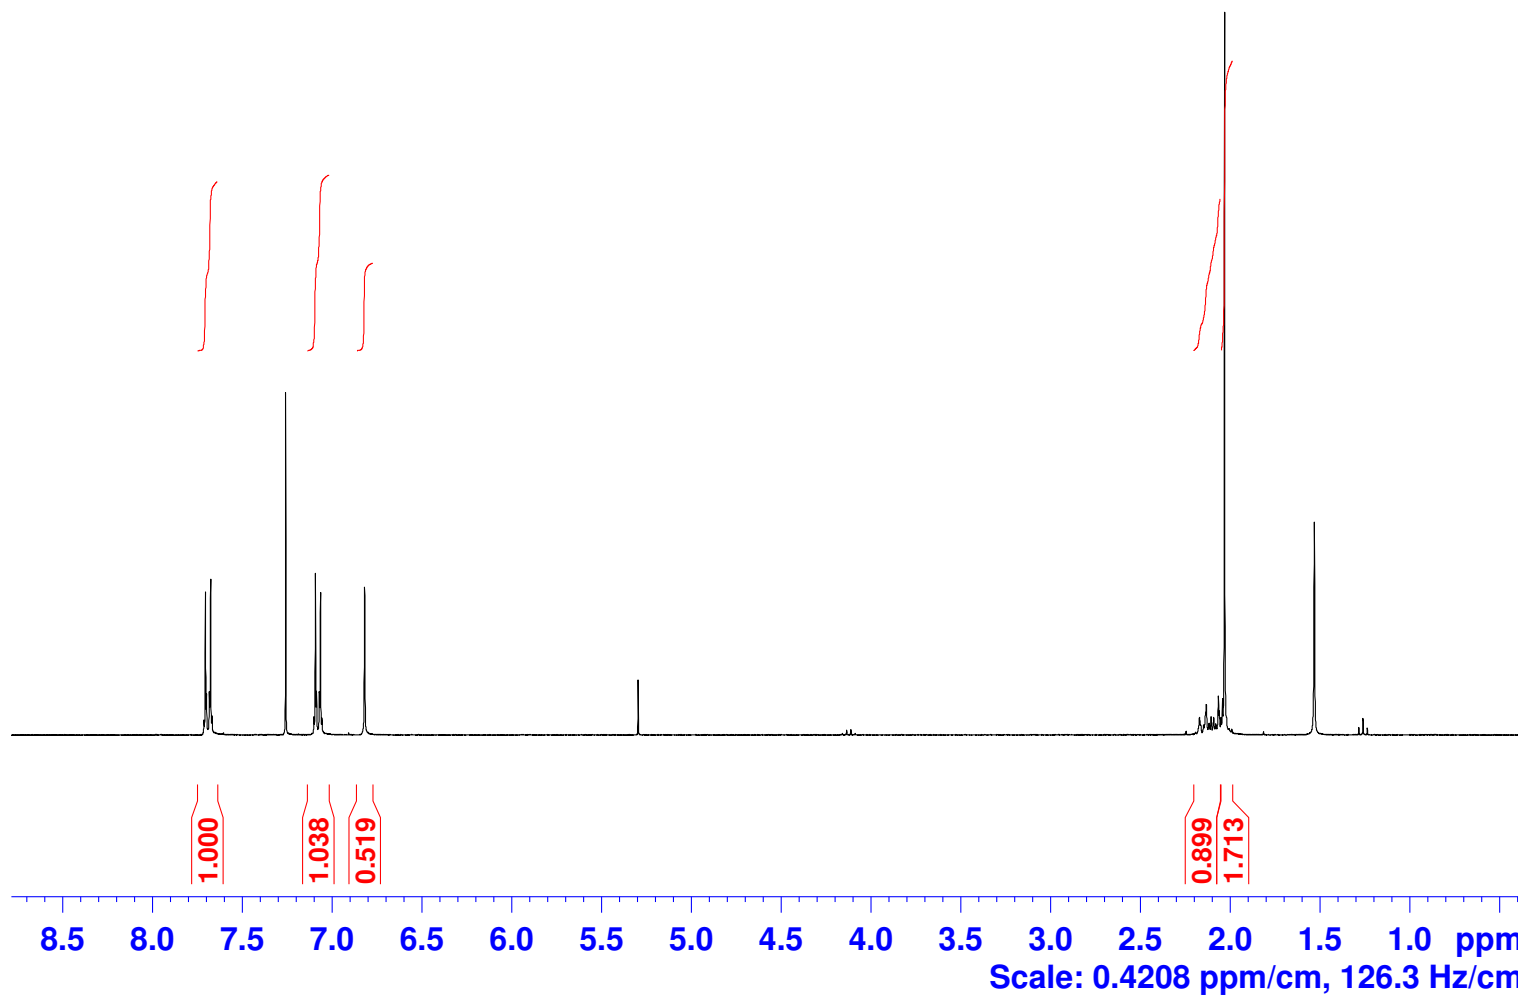



Current Data Parameters  
 NAME DPA-073 crude  
 EXPNO 2  
 PROCNO 1

F2 - Acquisition Parameter  
 Date\_ 20110303  
 Time 7.50  
 INSTRUM spect  
 PROBHD 5 mm Dual 13C/  
 PULPROG zgdc  
 TD 32768  
 SOLVENT CDC13  
 NS 32457  
 DS 0  
 SWH 19723.865 Hz  
 FIDRES 0.601925 Hz  
 AQ 0.8307188 se  
 RG 9195.2  
 DW 25.350 us  
 DE 9.46 us  
 TE 296.2 K  
 D1 0.10000000 se  
 d11 0.03000000 se  
 TD0 1

==== CHANNEL f1 =====  
 NUC1 13C  
 P1 3.00 us  
 PL1 -5.00 dB  
 SFO1 75.4759867 MH

==== CHANNEL f2 =====  
 CPDPRG2 waltz16  
 NUC2 1H  
 PCPD2 100.00 us  
 PL2 -6.00 dB  
 PL12 12.00 dB  
 SFO2 300.1312000 MH

F2 - Processing parameters  
 SI 32768  
 SF 75.4677508 MH  
 WDW EM  
 SSB 0  
 LB 2.00 Hz  
 GB 0  
 PC 1.00

169.509

143.627

137.623

132.445

126.503

93.112

78.799

77.427

77.209

77.004

76.580

35.135

21.782

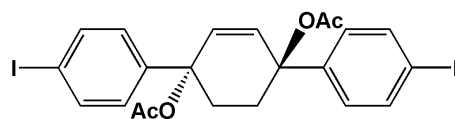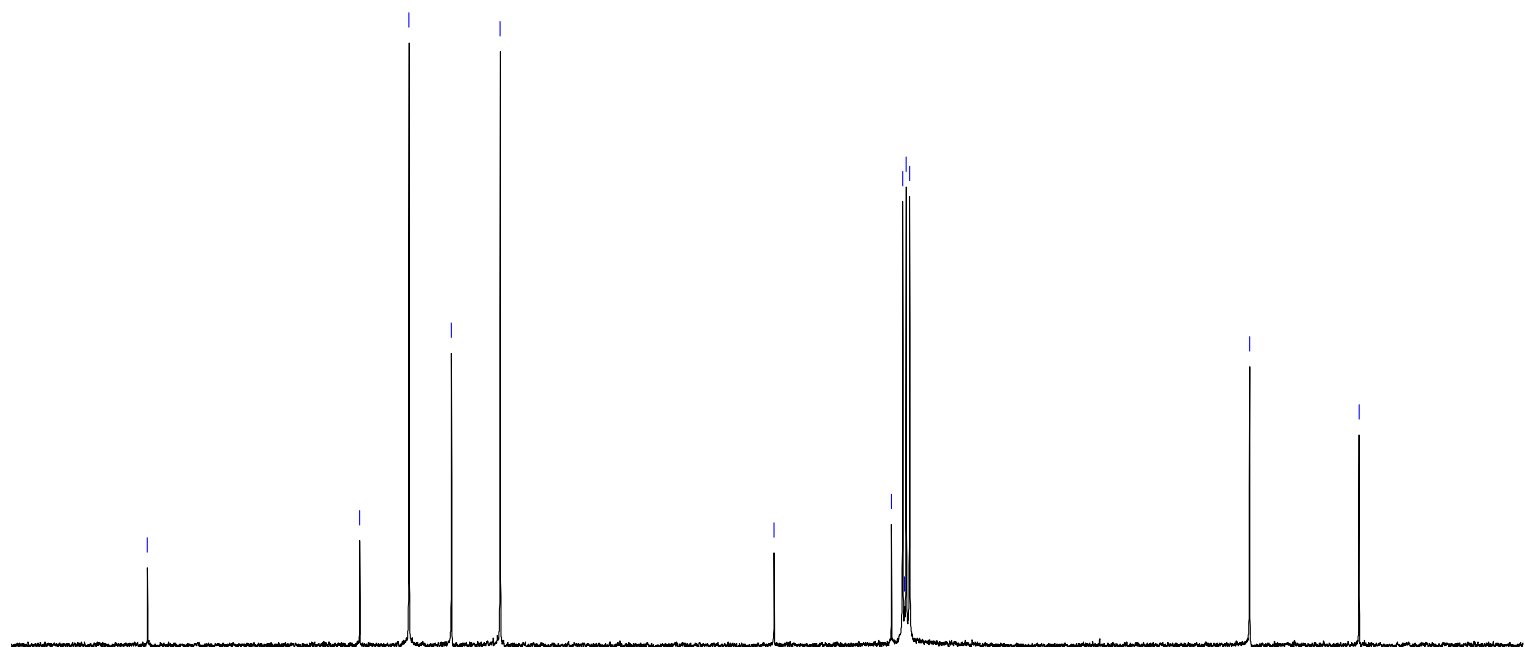

180 170 160 150 140 130 120 110 100 90 80 70 60 50 40 30 20 ppm

Scale: 9.214 ppm/cm, 695.4 Hz/cm



Current Data Parameters  
 NAME DPA-079\_24-30  
 EXPNO 1  
 PROCNO 1

F2 - Acquisition Parameter  
 Date\_ 20110307  
 Time 21.08  
 INSTRUM spect  
 PROBHD 5 mm Dual 13C/  
 PULPROG zg  
 TD 32768  
 SOLVENT CDC13  
 NS 64  
 DS 0  
 SWH 4194.631 Hz  
 FIDRES 0.128010 Hz  
 AQ 3.9059956 se  
 RG 912.3  
 DW 119.200 us  
 DE 6.00 us  
 TE 296.2 K  
 D1 0.10000000 se  
 TD0 1

===== CHANNEL f1 =====  
 NUC1 1H  
 P1 9.00 us  
 PL1 -3.00 dB  
 SFO1 300.1319000 MH

F2 - Processing parameters  
 SI 32768  
 SF 300.1300059 MH  
 WDW EM  
 SSB 0  
 LB 0.00 Hz  
 GB 0  
 PC 0.50

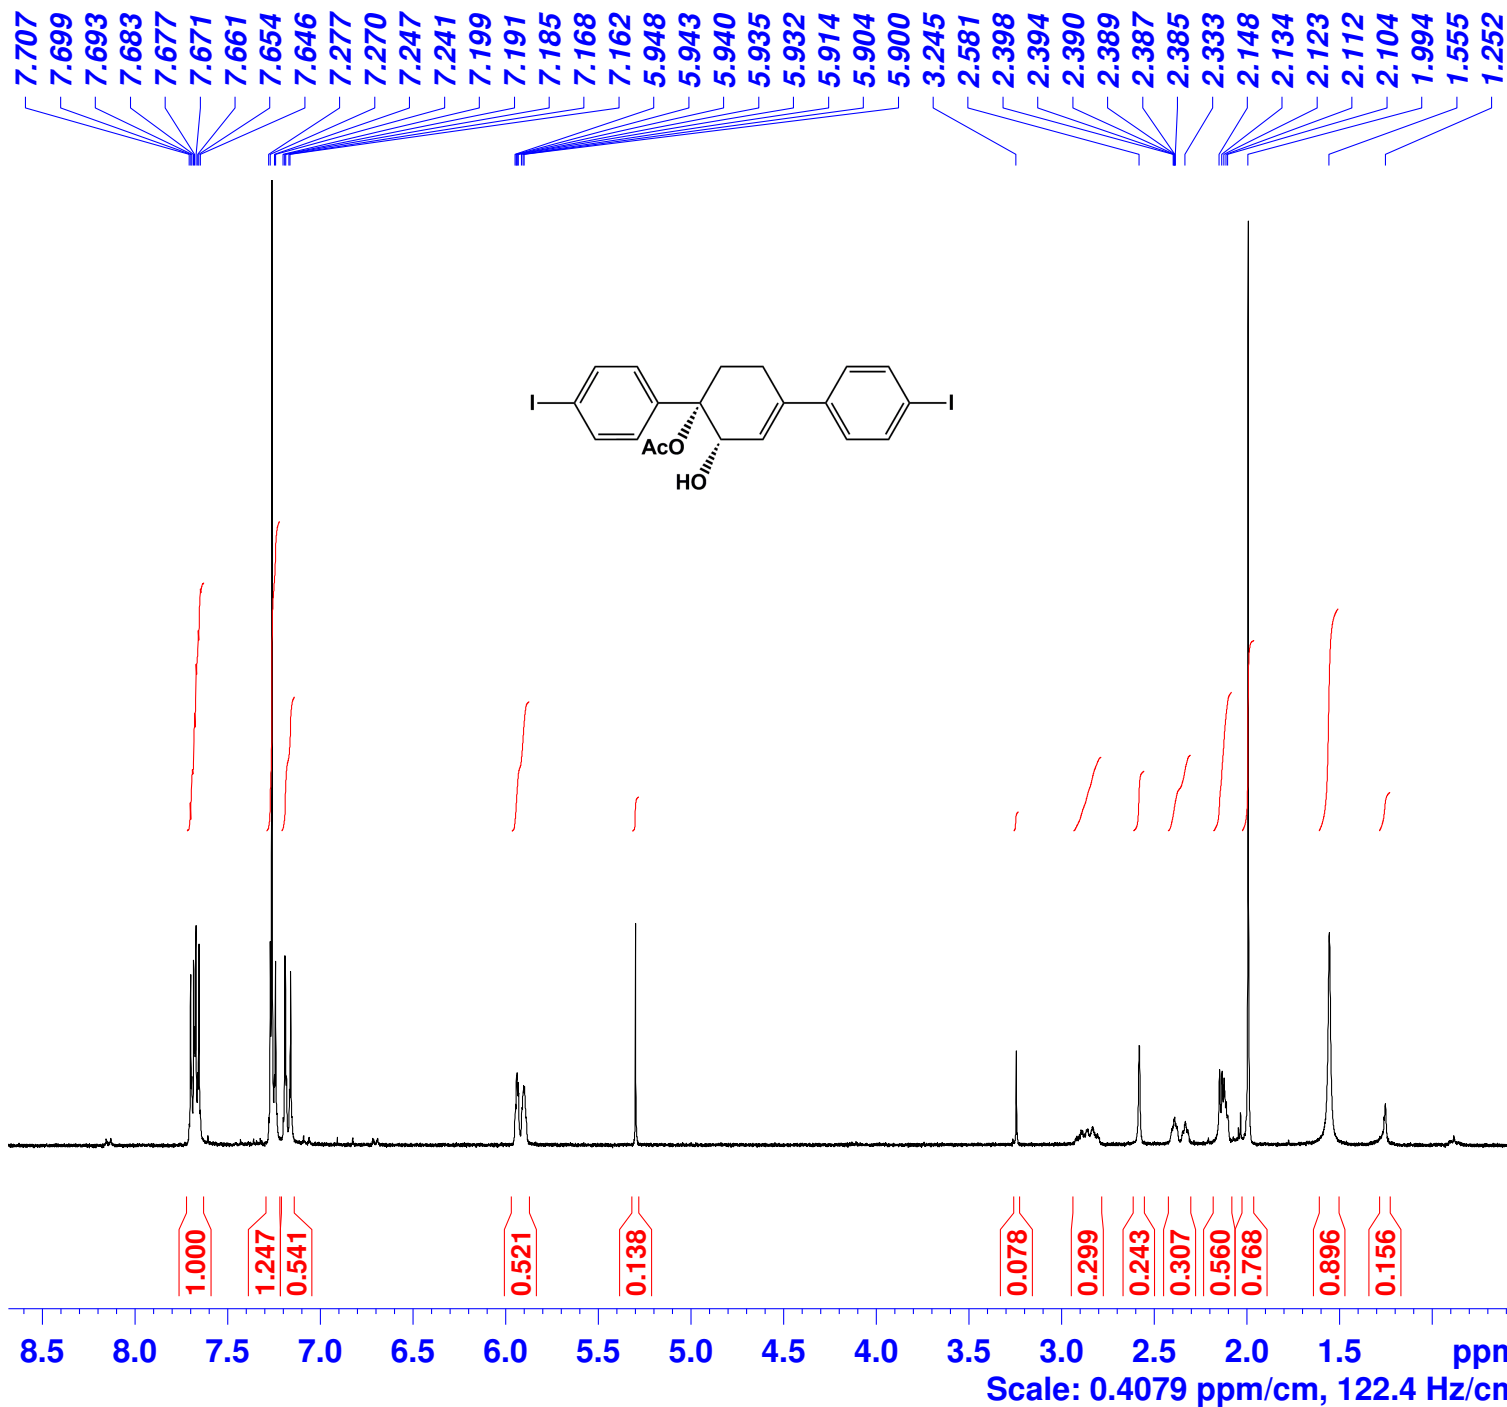



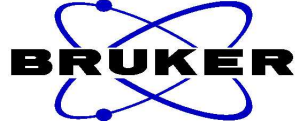

Current Data Parameters  
 NAME DPA-079\_24-30  
 EXPNO 2  
 PROCNO 1

F2 - Acquisition Parameter  
 Date\_ 20110308  
 Time 8.04  
 INSTRUM spect  
 PROBHD 5 mm Dual 13C/  
 PULPROG zgdc  
 TD 32768  
 SOLVENT CDC13  
 NS 35891  
 DS 0  
 SWH 19723.865 Hz  
 FIDRES 0.601925 Hz  
 AQ 0.8307188 se  
 RG 5792.6  
 DW 25.350 us  
 DE 9.46 us  
 TE 296.2 K  
 D1 0.10000000 se  
 d11 0.03000000 se  
 TD0 1

==== CHANNEL f1 =====  
 NUC1 13C  
 P1 3.00 us  
 PL1 -5.00 dB  
 SFO1 75.4759867 MH

==== CHANNEL f2 =====  
 CPDPRG2 waltz16  
 NUC2 1H  
 PCPD2 100.00 us  
 PL2 -6.00 dB  
 PL12 12.00 dB  
 SFO2 300.1312000 MH

F2 - Processing parameters  
 SI 32768  
 SF 75.4677387 MH  
 WDW EM  
 SSB 0  
 LB 2.00 Hz  
 GB 0  
 PC 1.00

170.132  
 144.682  
 140.313  
 139.569  
 137.639  
 137.604  
 127.367  
 127.239  
 121.438

93.642  
 93.265  
 77.585  
 77.161  
 76.738  
 74.357  
 72.779

35.154  
 24.886  
 21.119

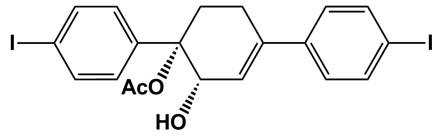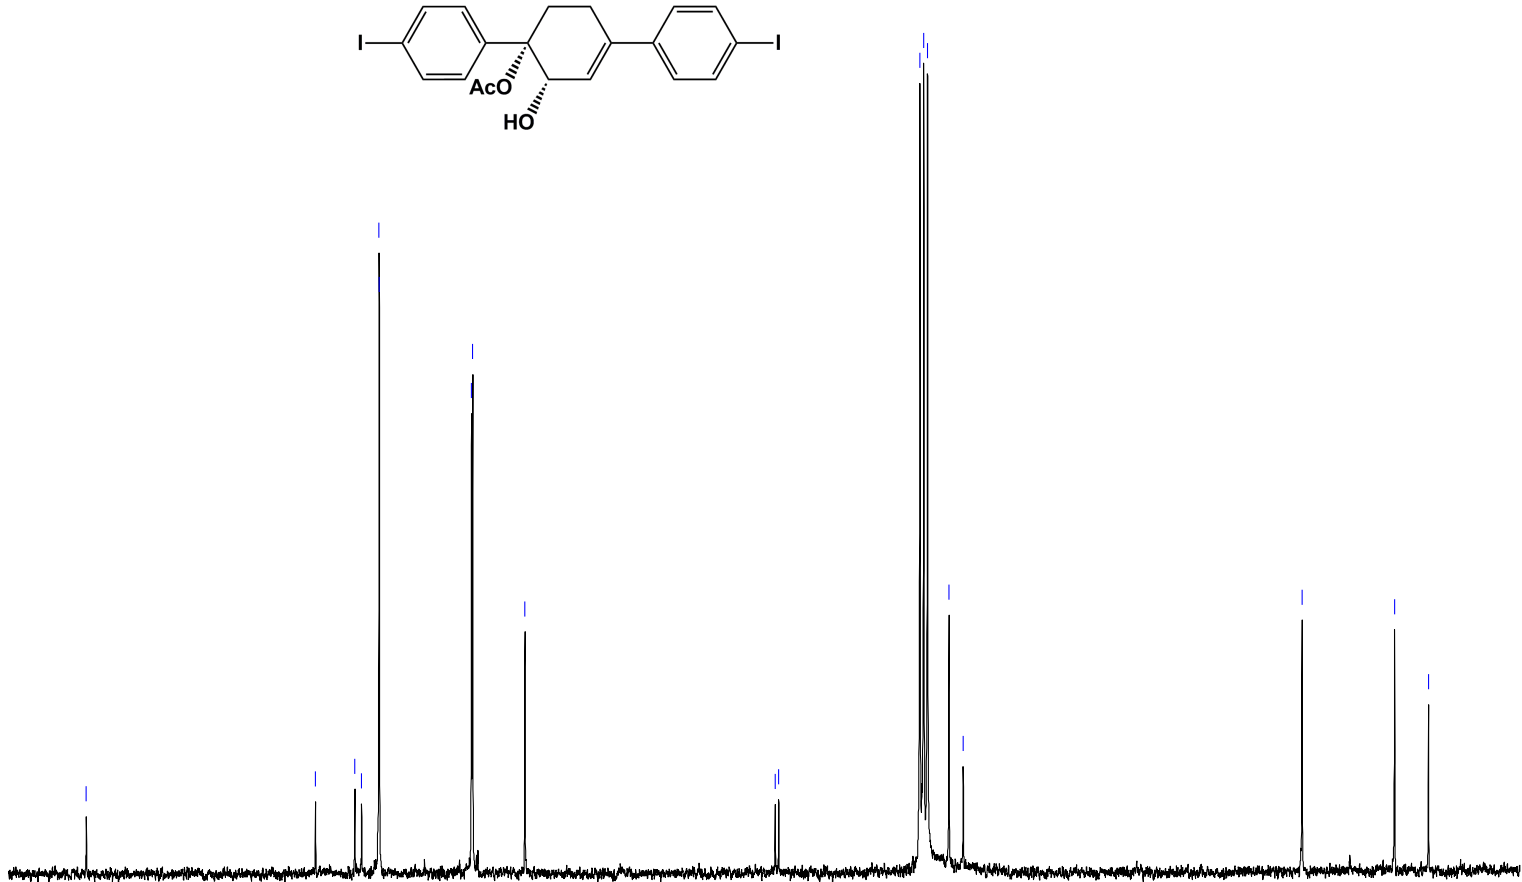

170 160 150 140 130 120 110 100 90 80 70 60 50 40 30 ppm  
 Scale: 8.391 ppm/cm, 633.2 Hz/cm



Current Data Parameters  
 NAME DPA-079\_24-30  
 EXPNO 3  
 PROCNO 1

F2 - Acquisition Parameters  
 Date\_ 20110308  
 Time 19.56  
 INSTRUM spect  
 PROBHD 5 mm Dual 13C/  
 PULPROG dept135  
 TD 32768  
 SOLVENT CDC13  
 NS 2921  
 DS 0  
 SWH 19723.865 Hz  
 FIDRES 0.601925 Hz  
 AQ 0.8307188 sec  
 RG 9195.2  
 DW 25.350 usec  
 DE 9.46 usec  
 TE 296.2 K  
 CNST2 145.000000  
 D1 1.00000000 sec  
 d2 0.00344828 sec  
 d12 0.00002000 sec  
 DELTA 0.00000853 sec  
 TD0 1

===== CHANNEL f1 =====  
 NUC1 13C  
 P1 6.70 usec  
 p2 13.40 usec  
 PL1 -5.00 dB  
 SFO1 75.4759867 MHz

===== CHANNEL f2 =====  
 CPDPRG2 waltz16  
 NUC2 1H  
 P3 16.00 usec  
 p4 32.00 usec  
 PCPD2 100.00 usec  
 PL2 -6.00 dB  
 PL12 12.00 dB  
 SFO2 300.1312000 MHz

F2 - Processing parameters  
 SI 32768  
 SF 75.4677469 MHz  
 WDW EM  
 SSB 0  
 LB 2.00 Hz  
 GB 0  
 PC 1.00

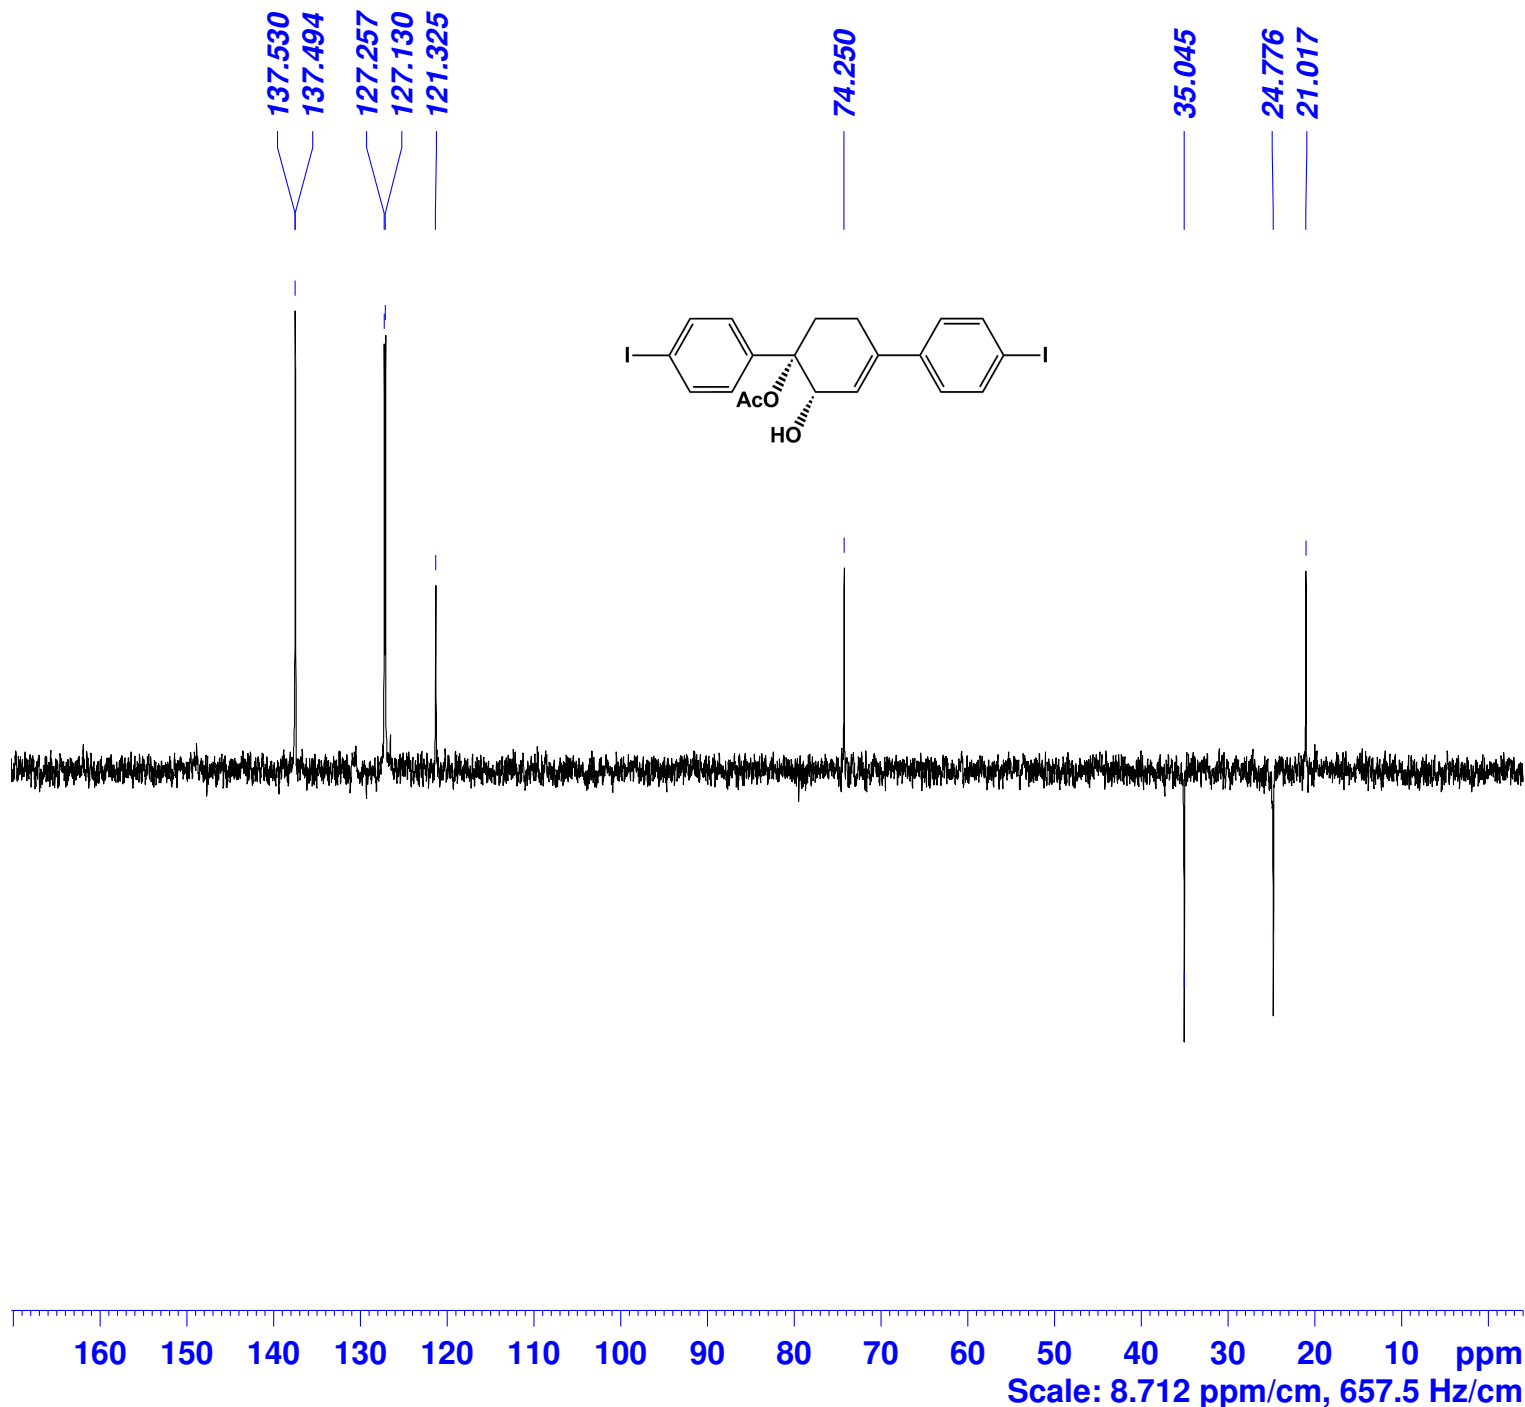

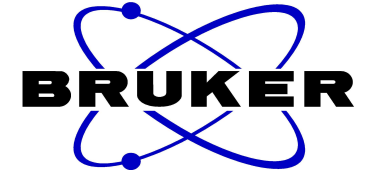

```

NAME      DPA-146_precipitated-700 MHz
EXPNO     1
PROCNO    1
Date_     20110801
Time      8.23
INSTRUM   spect
PROBHD    5 mm CPTCI 1H-
PULPROG   zg30
TD        65536
SOLVENT   DMSO
NS        40
DS        0
SWH       9803.922 Hz
FIDRES    0.149596 Hz
AQ        3.3423860 sec
RG        16
DW        51.000 usec
DE        6.50 usec
TE        300.0 K
D1        1.00000000 sec
TD0       1
    
```

```

===== CHANNEL f1 =====
NUC1      1H
P1        9.20 usec
PL1       4.00 dB
PL1W      9.00000000 W
SFO1      700.4542027 MHz
SI        65536
SF        700.4500098 MHz
WDW       EM
SSB       0
LB        0.00 Hz
GB        0
PC        1.00
    
```

7.952  
7.926  
7.865  
7.732  
7.694  
7.588  
7.456  
7.365  
7.202

6.811  
  
6.012  
5.951  
5.898  
  
5.486

2.191  
2.116  
  
1.695  
1.574

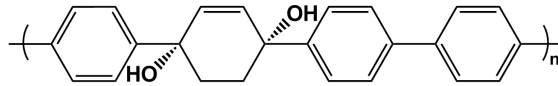

Mn,NMR= 5810 g/mol

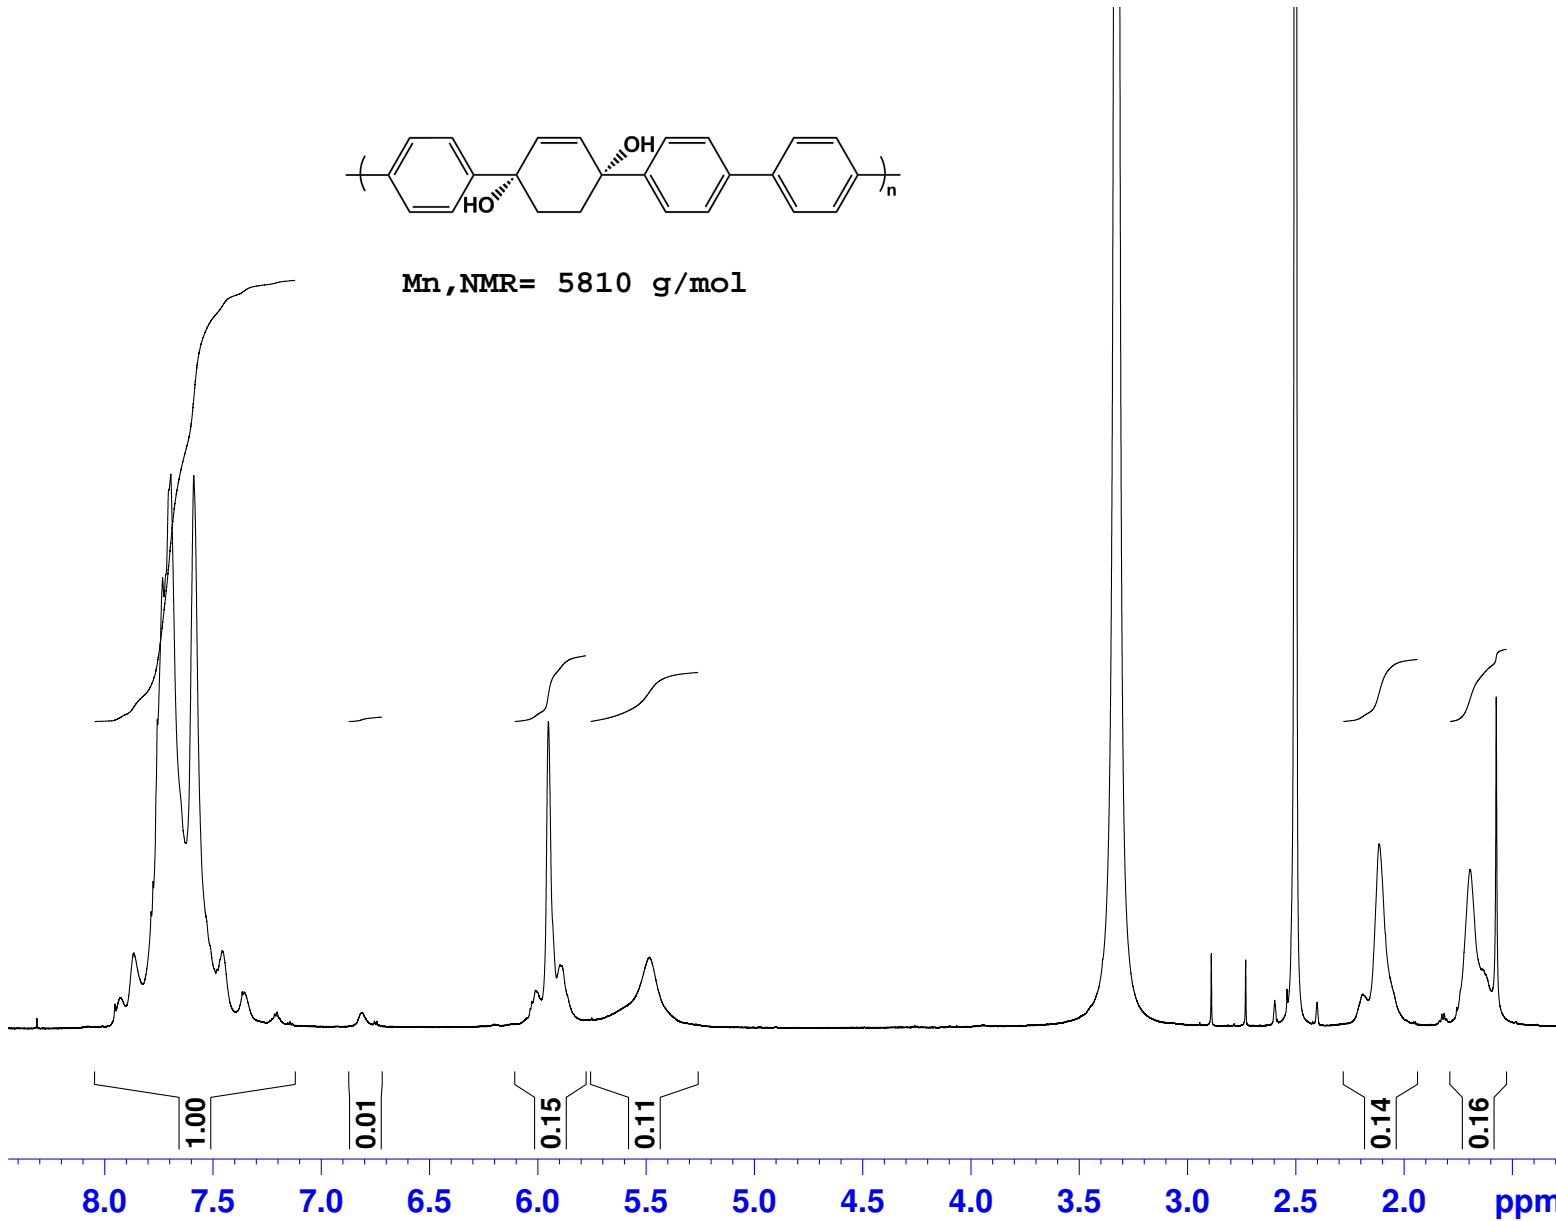

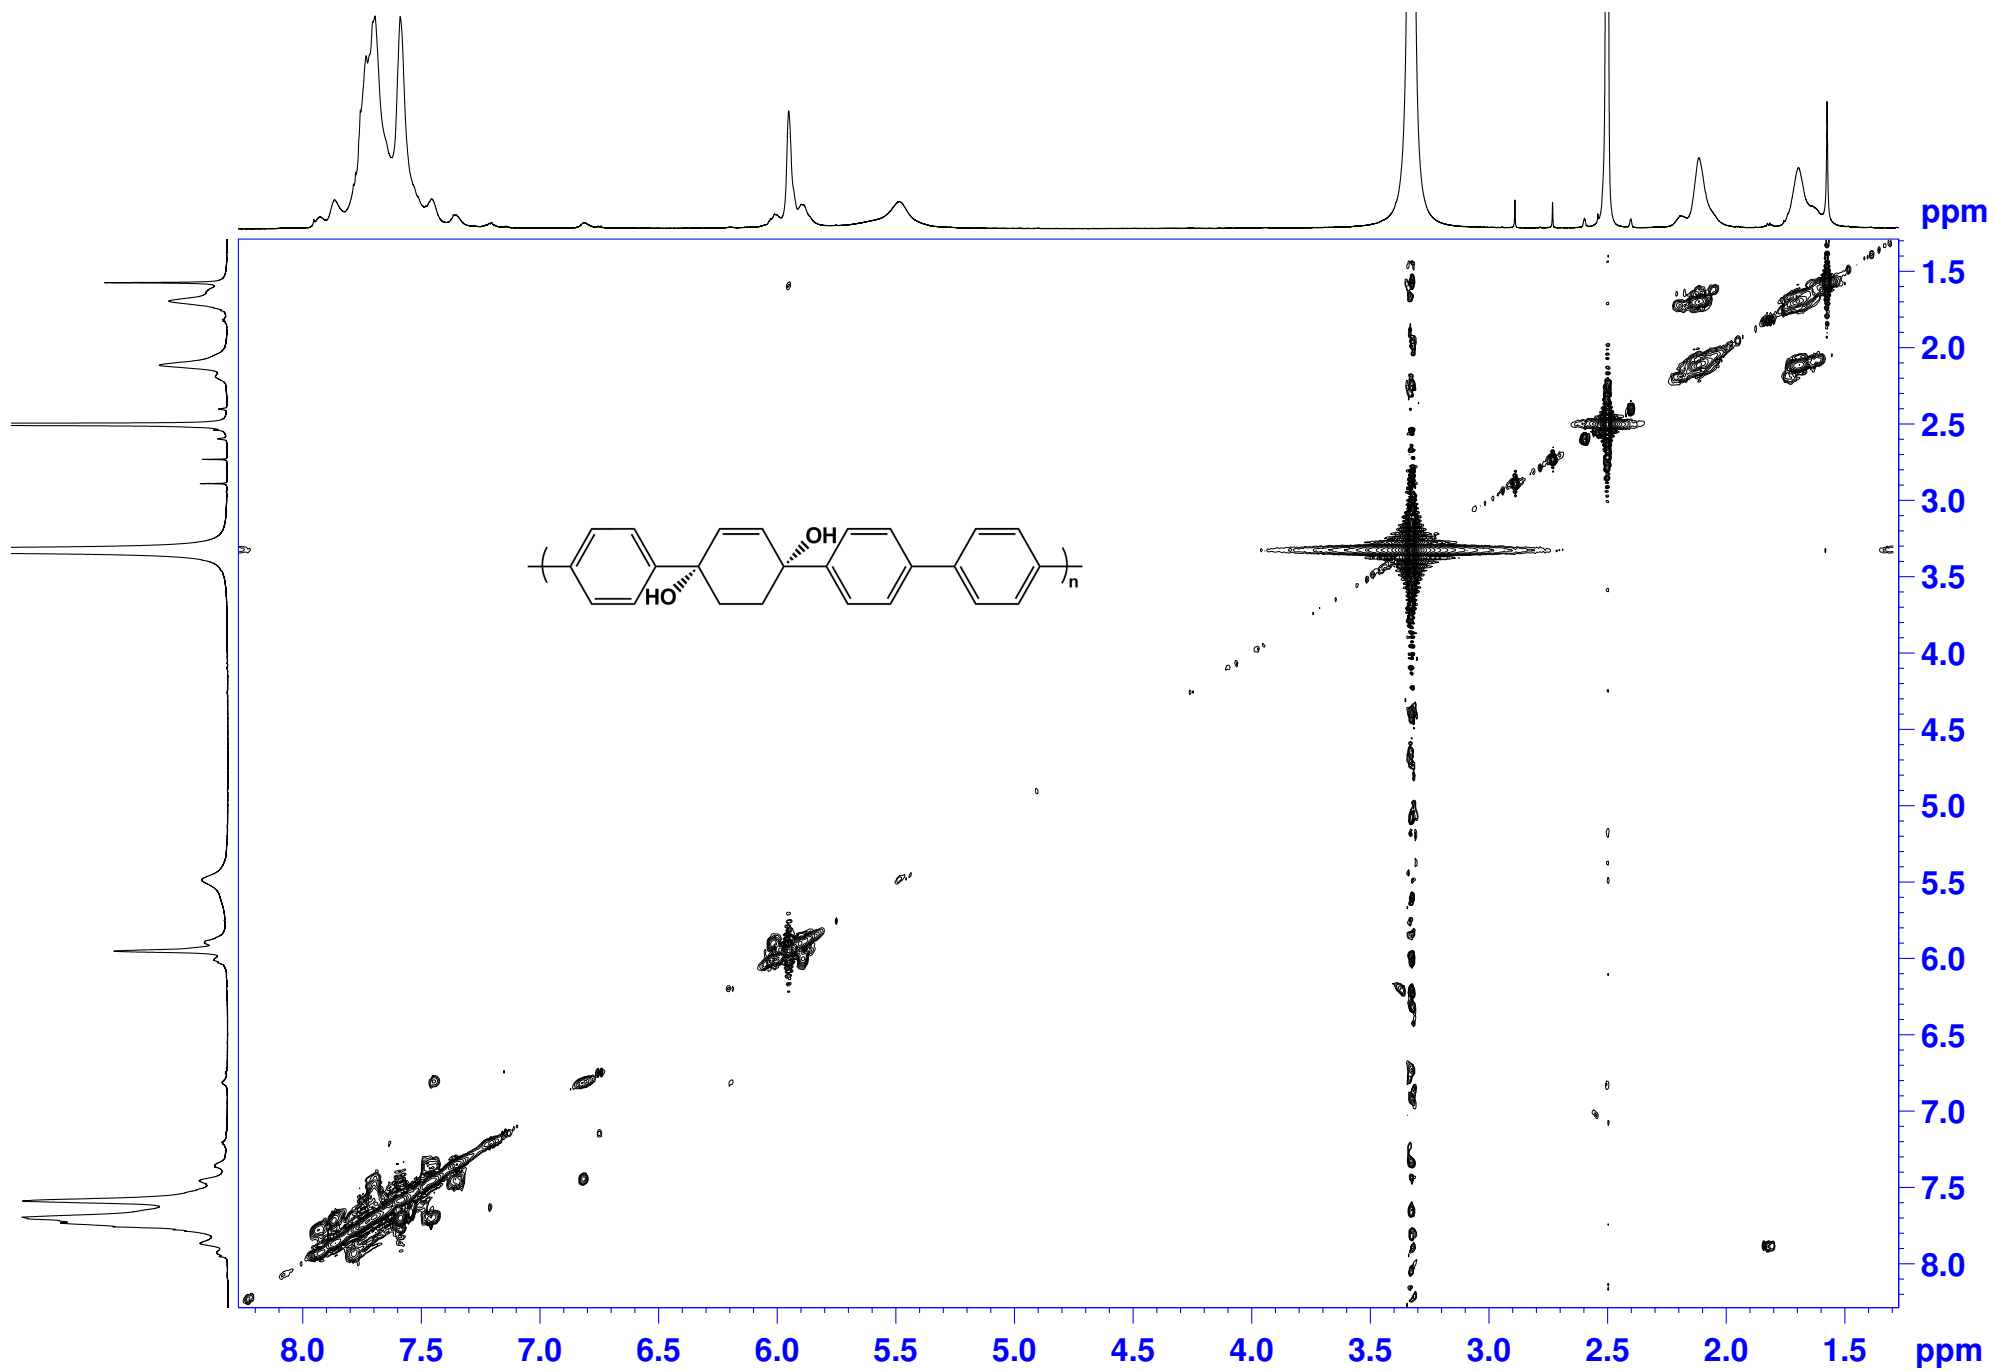

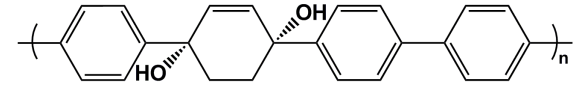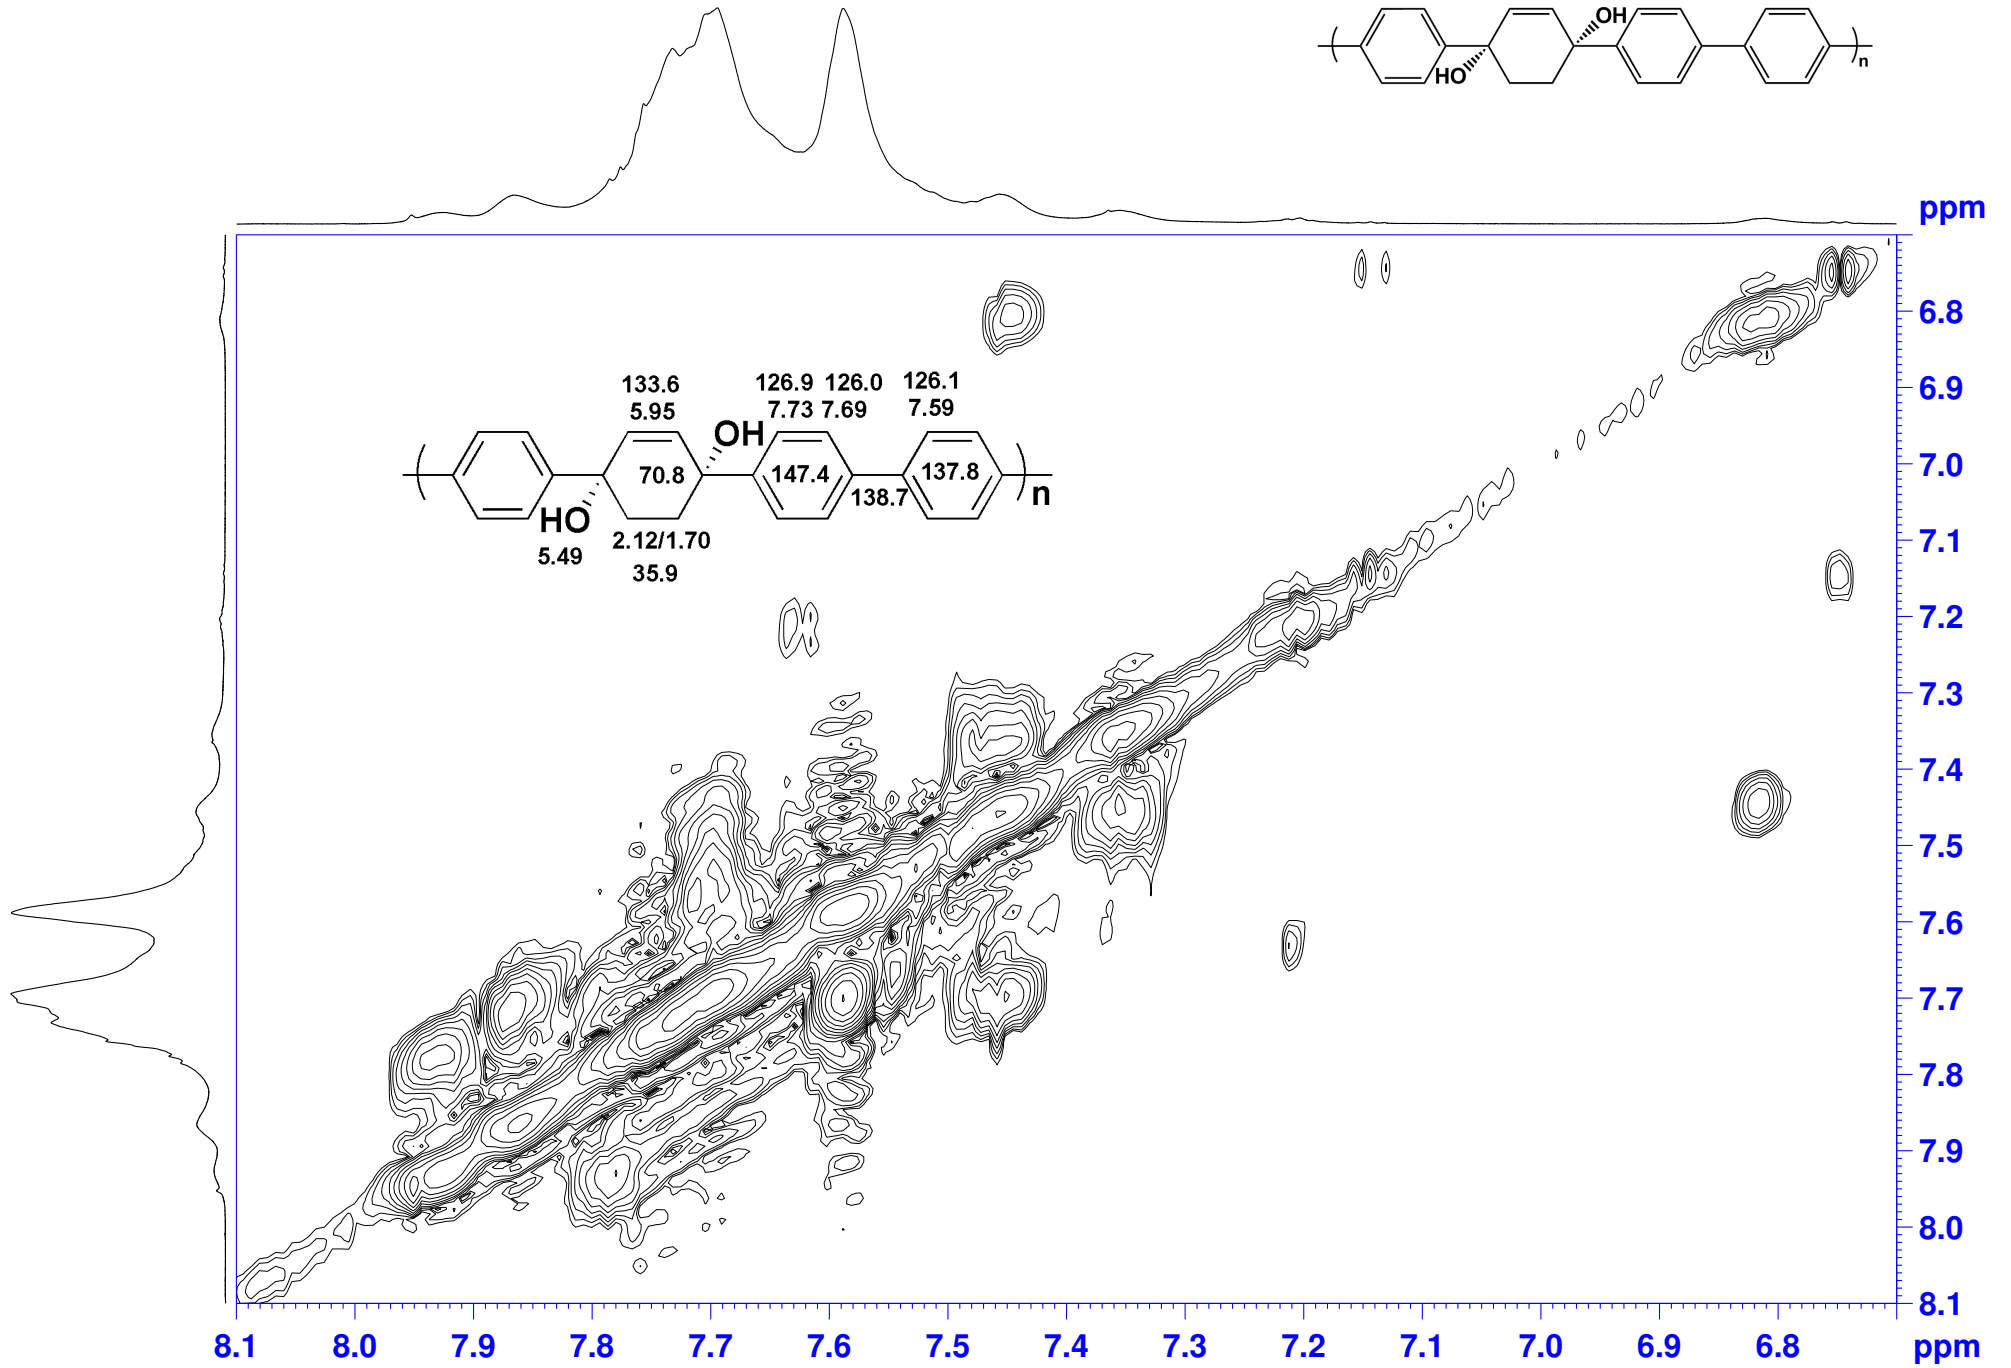

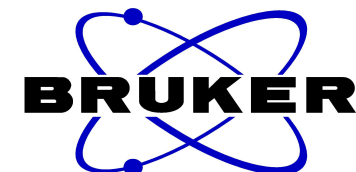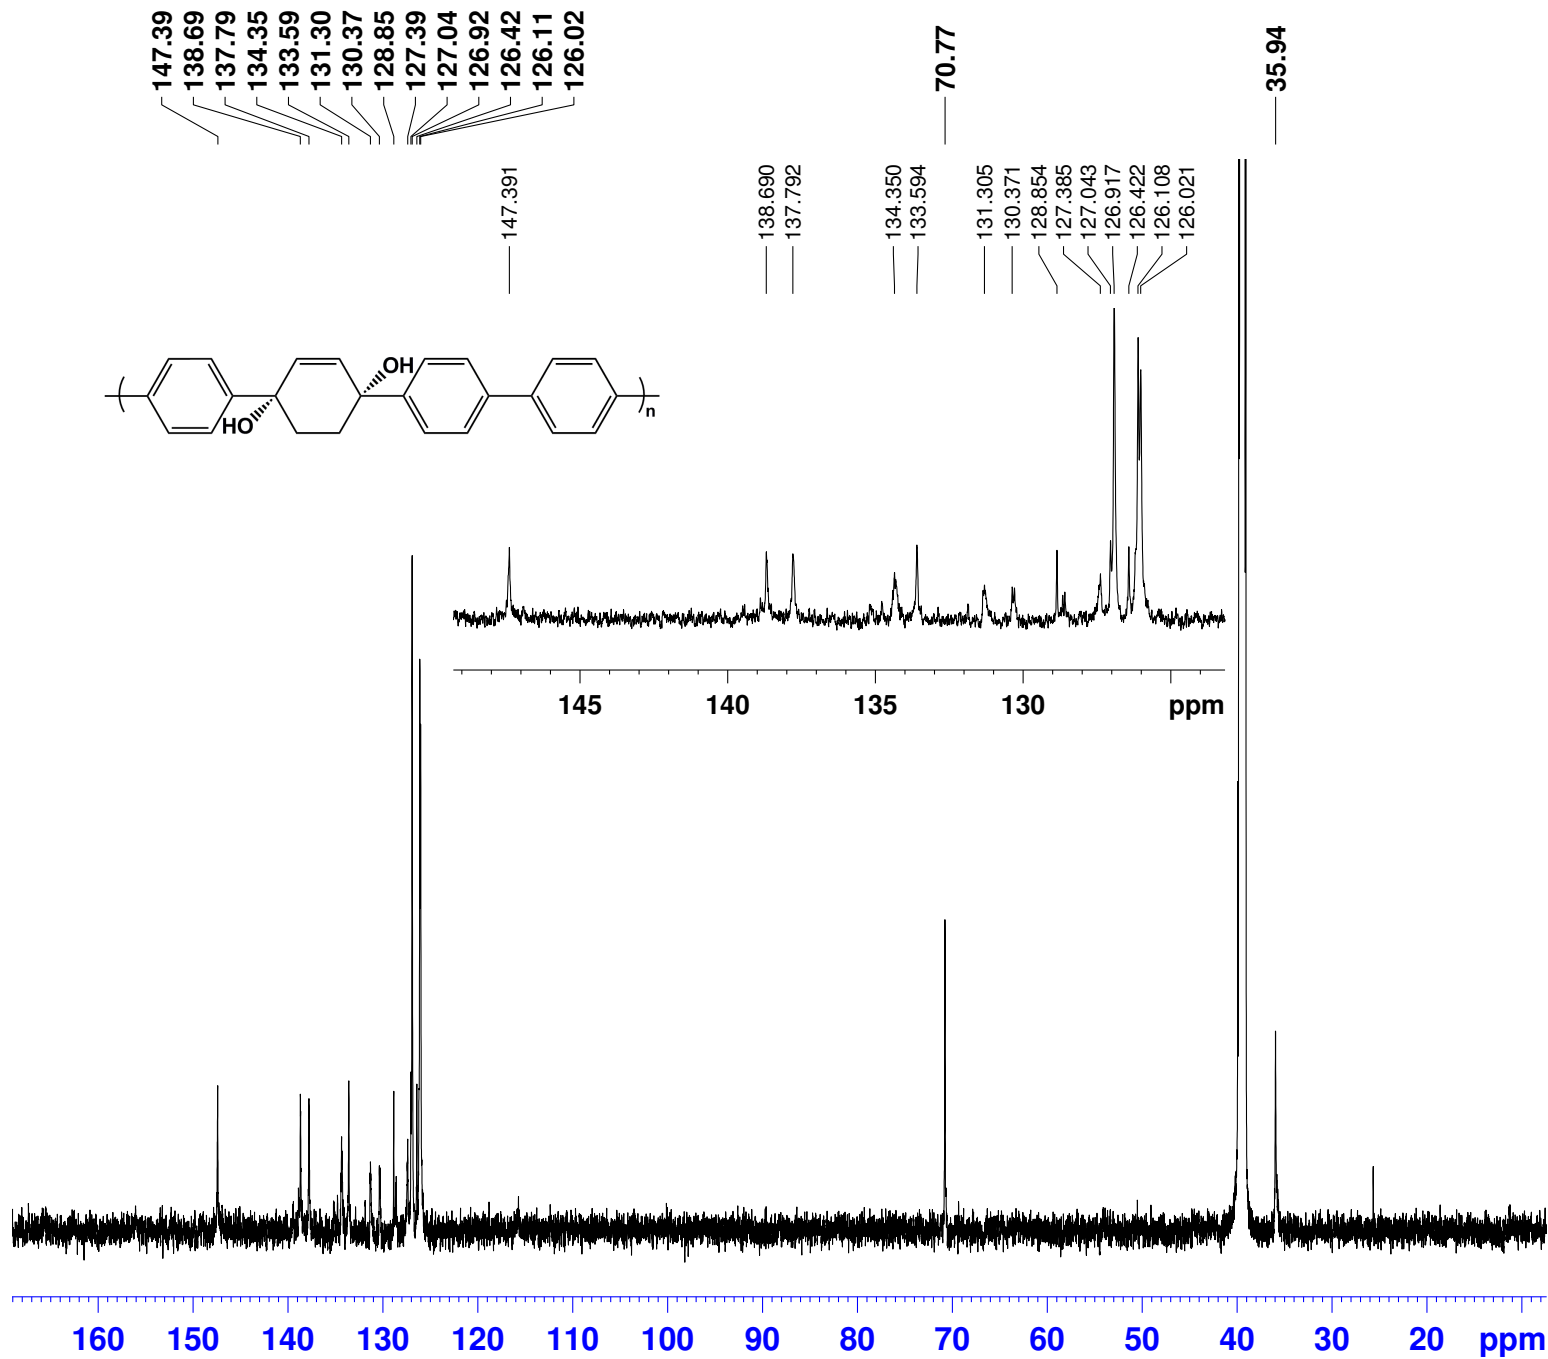

```

NAME      DPA-146_precipitated-700 MHz
EXPNO     2
PROCNO    1
Date_     20110801
Time      8.28
INSTRUM   spect
PROBHD    5 mm CPTCI 1H-
PULPROG   zgdc30
TD         65356
SOLVENT   DMSO
NS         1721
DS         0
SWH       42613.637 Hz
FIDRES    0.652023 Hz
AQ         0.7668937 sec
RG         1620
DW         11.733 usec
DE         20.00 usec
TE         300.0 K
D1         0.30000001 sec
D11        0.03000000 sec
TD0        1

```

```

===== CHANNEL f1 =====
NUC1      13C
P1        14.00 usec
PL1       7.00 dB
PL1W      18.94487762 W
SFO1      176.1476671 MHz

```

```

===== CHANNEL f2 =====
CPDPRG2   waltz16
NUC2      1H
PCPD2     65.00 usec
PL2       4.00 dB
PL12      20.98 dB
PL2W      9.00000000 W
PL12W     0.18029827 W
SFO2      700.4531737 MHz
SI         65536
SF         176.1283960 MHz
WDW       EM
SSB       0
LB         2.00 Hz
GB         0
PC         1.40

```

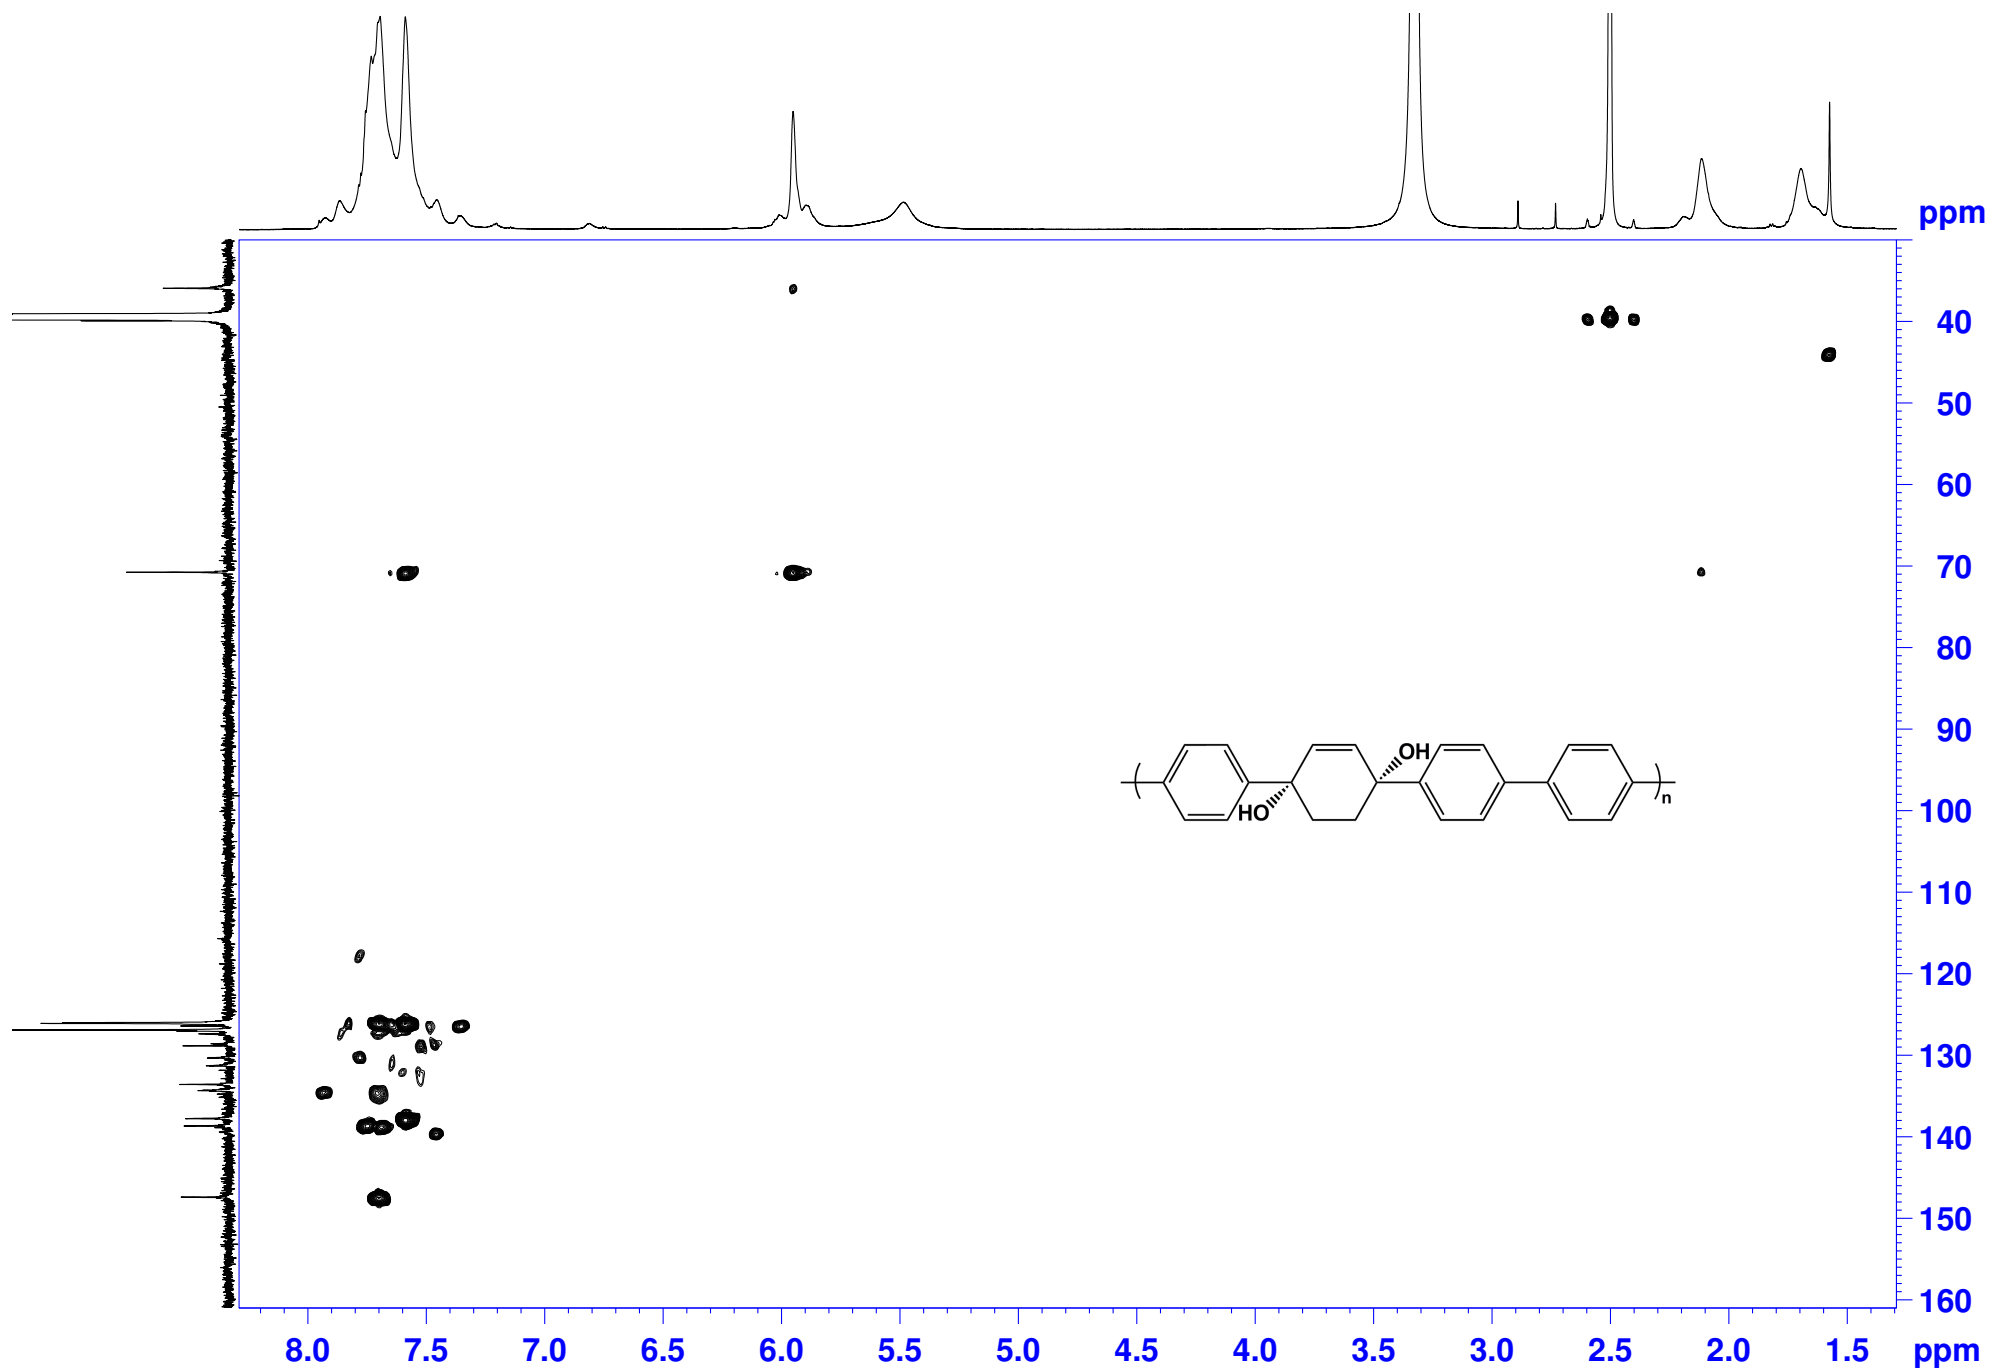

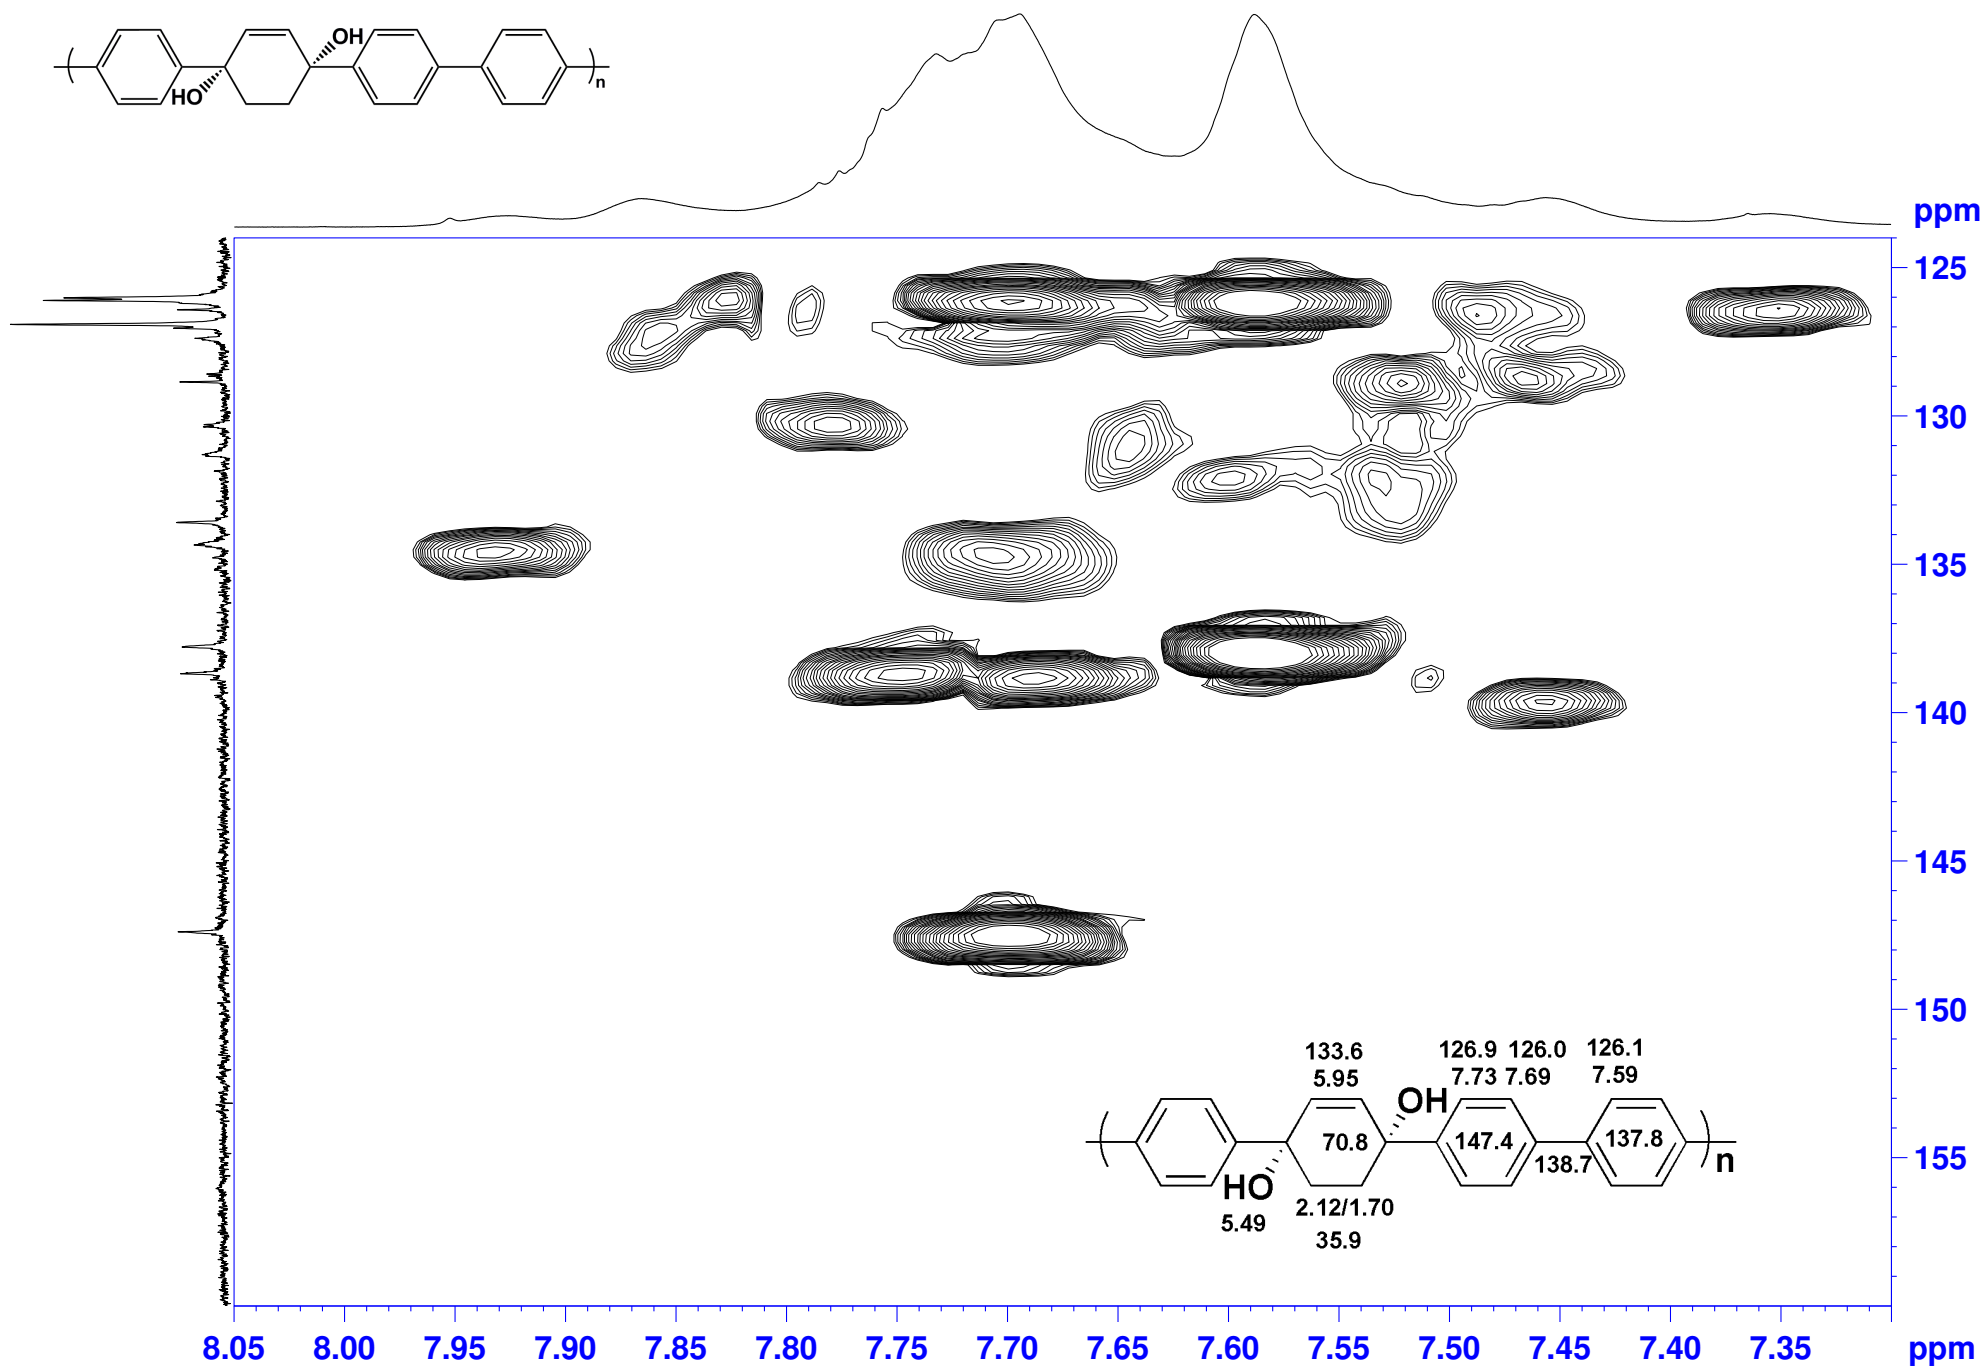



Sample: DPA-136  
Size: 6.2720 mg  
Method: Ramp  
Comment: N2

# TGA

S25

File: C:\...TGA analysis\fd12jul11-101.TGA  
Operator: Bruria  
Run Date: 12-Jul-2011 23:39  
Instrument: TGA Q500 V6.4 Build 193

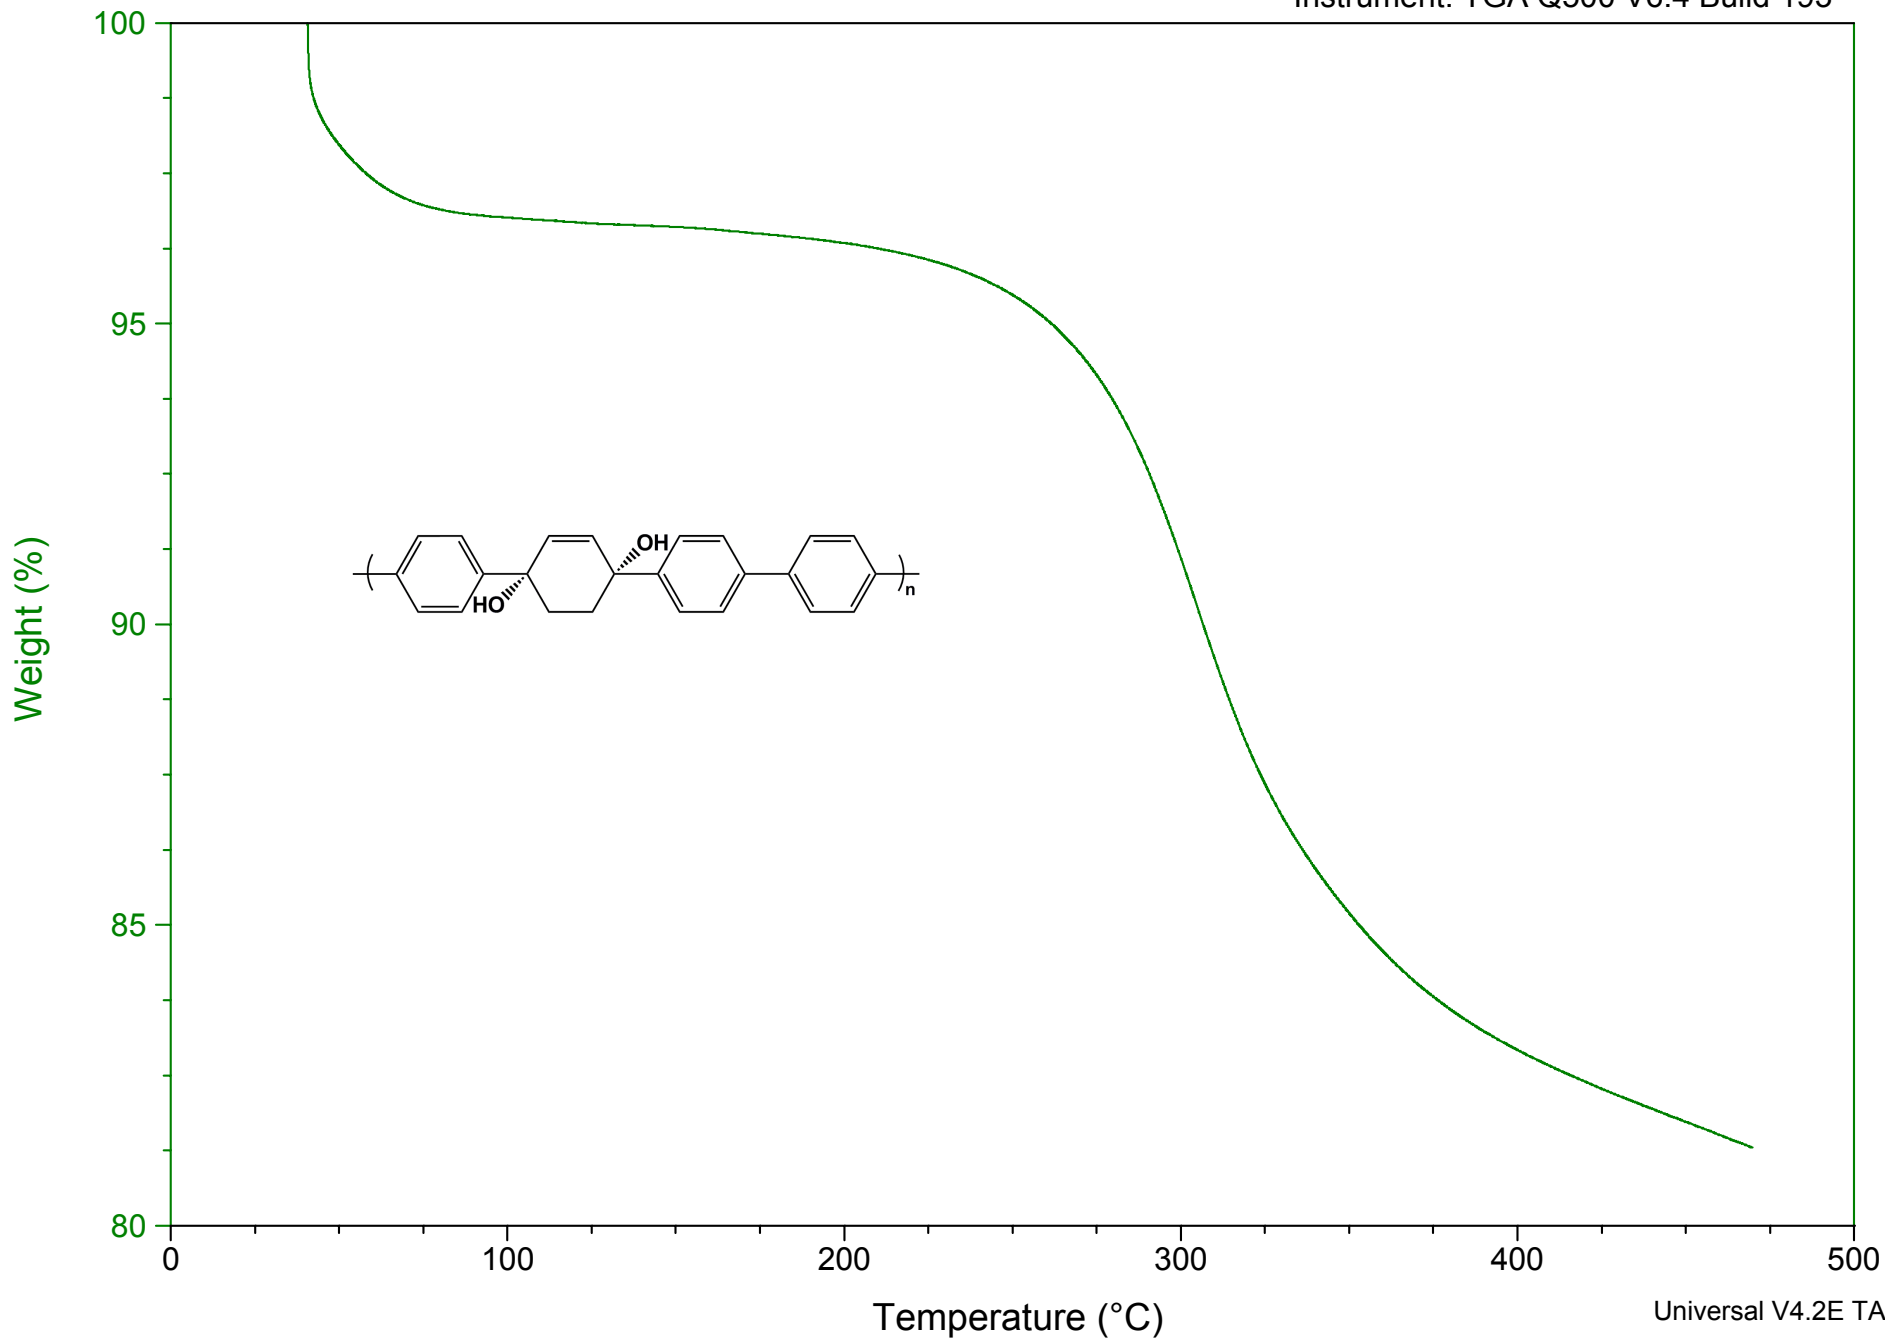

## MW Averages

Mp: 5978

Mn: 5078

Mv: 5950

Mw: 6107

Mz: 7181

Mz+1: 8213

PD: 1.2026

## Distribution Plots

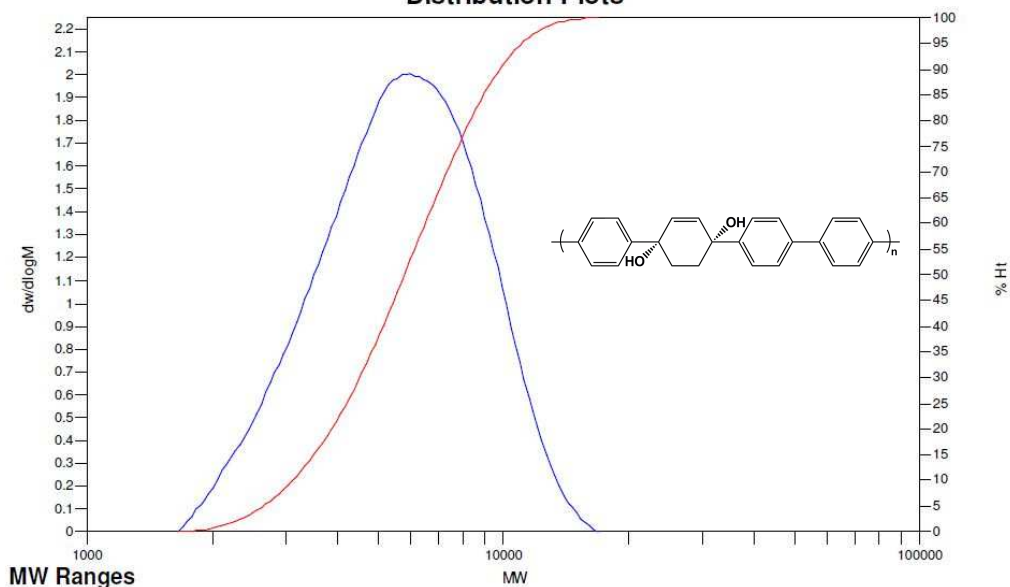GPC trace of *cis-1a* in DMF

## MW Averages

Mp: 4808

Mn: 5185

Mv: 5780

Mw: 5900

Mz: 6787

Mz+1: 7811

PD: 1.1379

## Distribution Plots

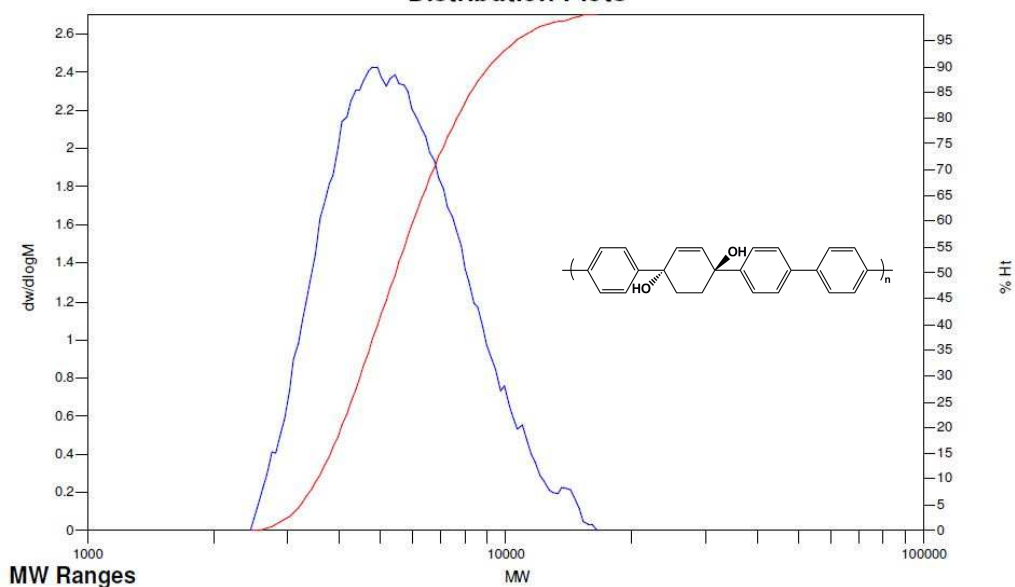GPC trace of *trans-1b* in DMF

7.973  
7.972  
7.966  
7.956  
7.954  
7.950  
7.857  
7.786  
7.763  
7.740  
7.714  
7.688  
7.681  
7.680  
7.677  
7.652  
7.631  
7.554  
7.496  
5.941  
5.937  
5.934  
5.895  
5.869  
5.856  
2.107  
2.100  
2.083  
2.056  
1.857  
1.853  
1.850  
1.848  
1.828  
1.826  
1.814  
1.800  
1.797  
1.785  
1.784  
1.780  
1.779  
1.775

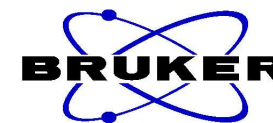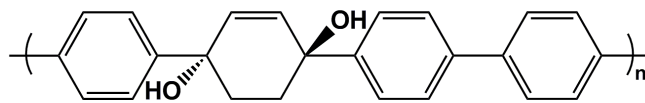

$M_{n,NMR} = 3050 \text{ g/mol}$

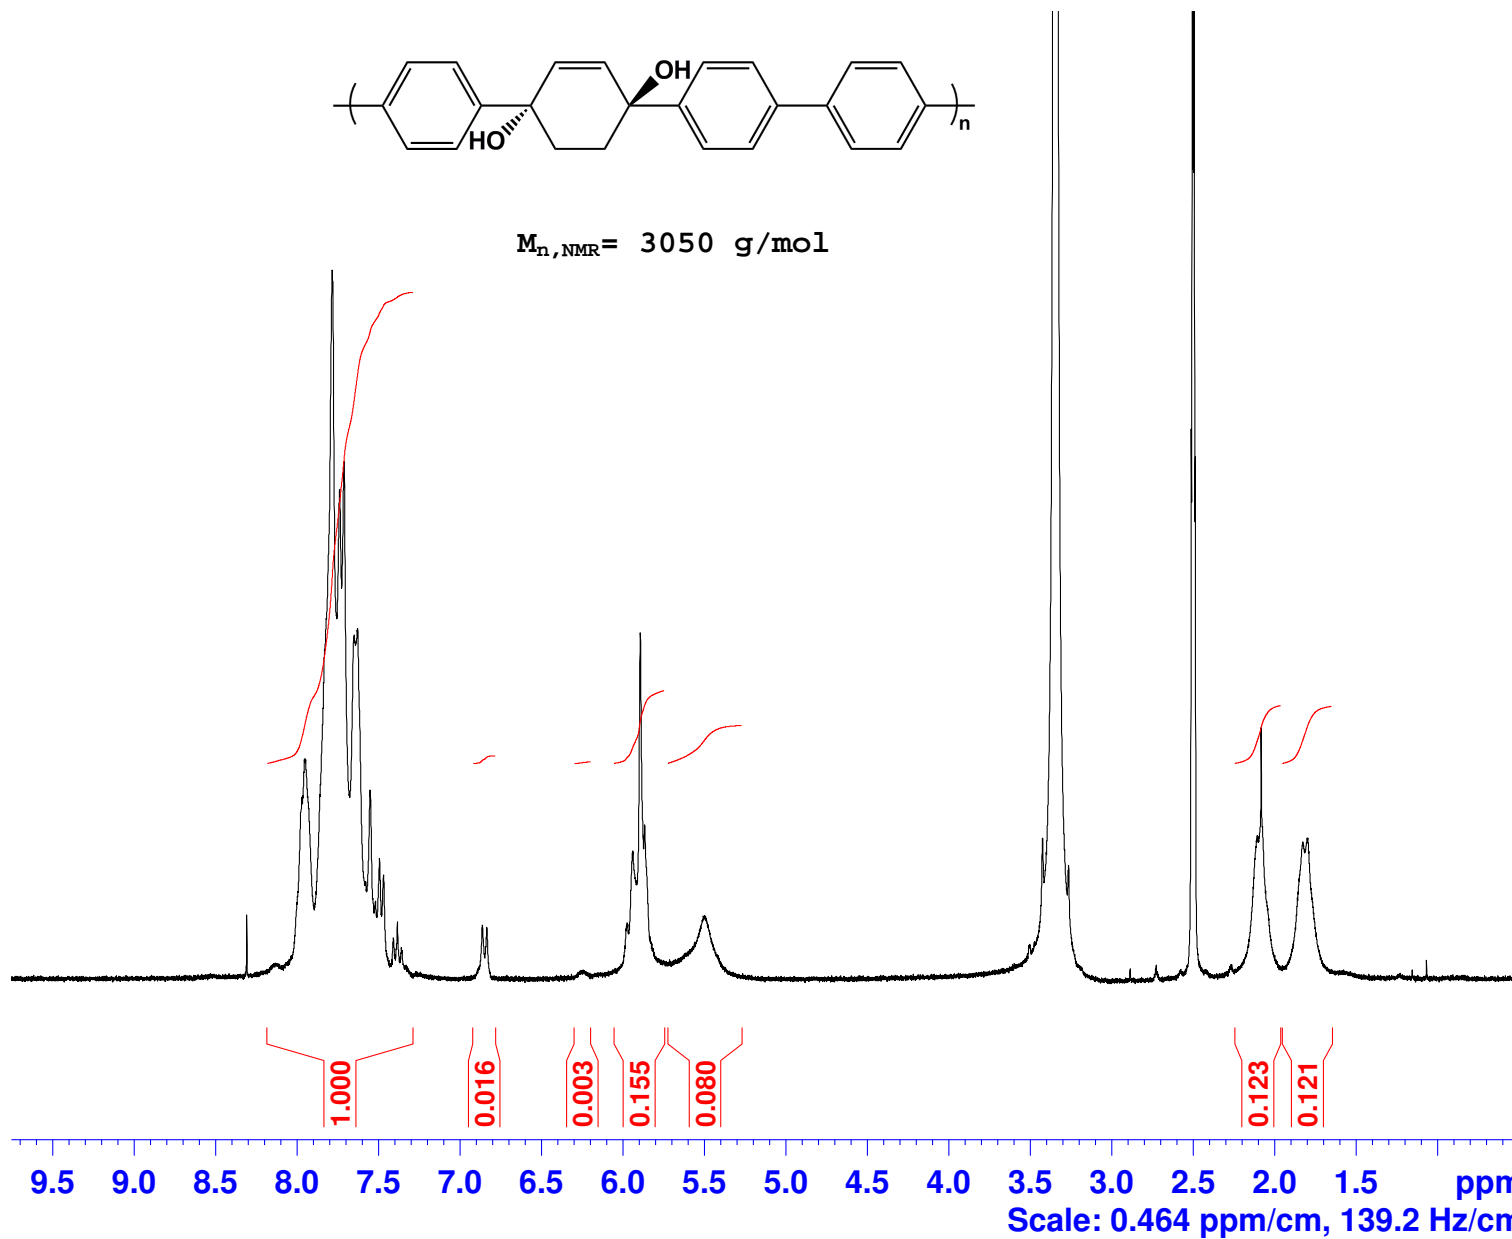

Current Data Parameters  
NAME DPA-148\_reprecipitated\_Soxhlet\_so  
EXPNO 1  
PROCNO 1

F2 - Acquisition Parameters  
Date\_ 20110724  
Time 18.31  
INSTRUM spect  
PROBHD 5 mm Dual 13C/  
PULPROG zg  
TD 32768  
SOLVENT DMSO  
NS 128  
DS 0  
SWH 4194.631 Hz  
FIDRES 0.128010 Hz  
AQ 3.9059956 sec  
RG 362  
DW 119.200 usec  
DE 6.00 usec  
TE 298.2 K  
D1 0.1000000 sec  
TD0 1

===== CHANNEL f1 =====  
NUC1 1H  
P1 9.00 usec  
PL1 -3.00 dB  
SFO1 300.1319000 MHz

F2 - Processing parameters  
SI 32768  
SF 300.1300007 MHz  
WDW EM  
SSB 0  
LB 0.00 Hz  
GB 0  
PC 0.50

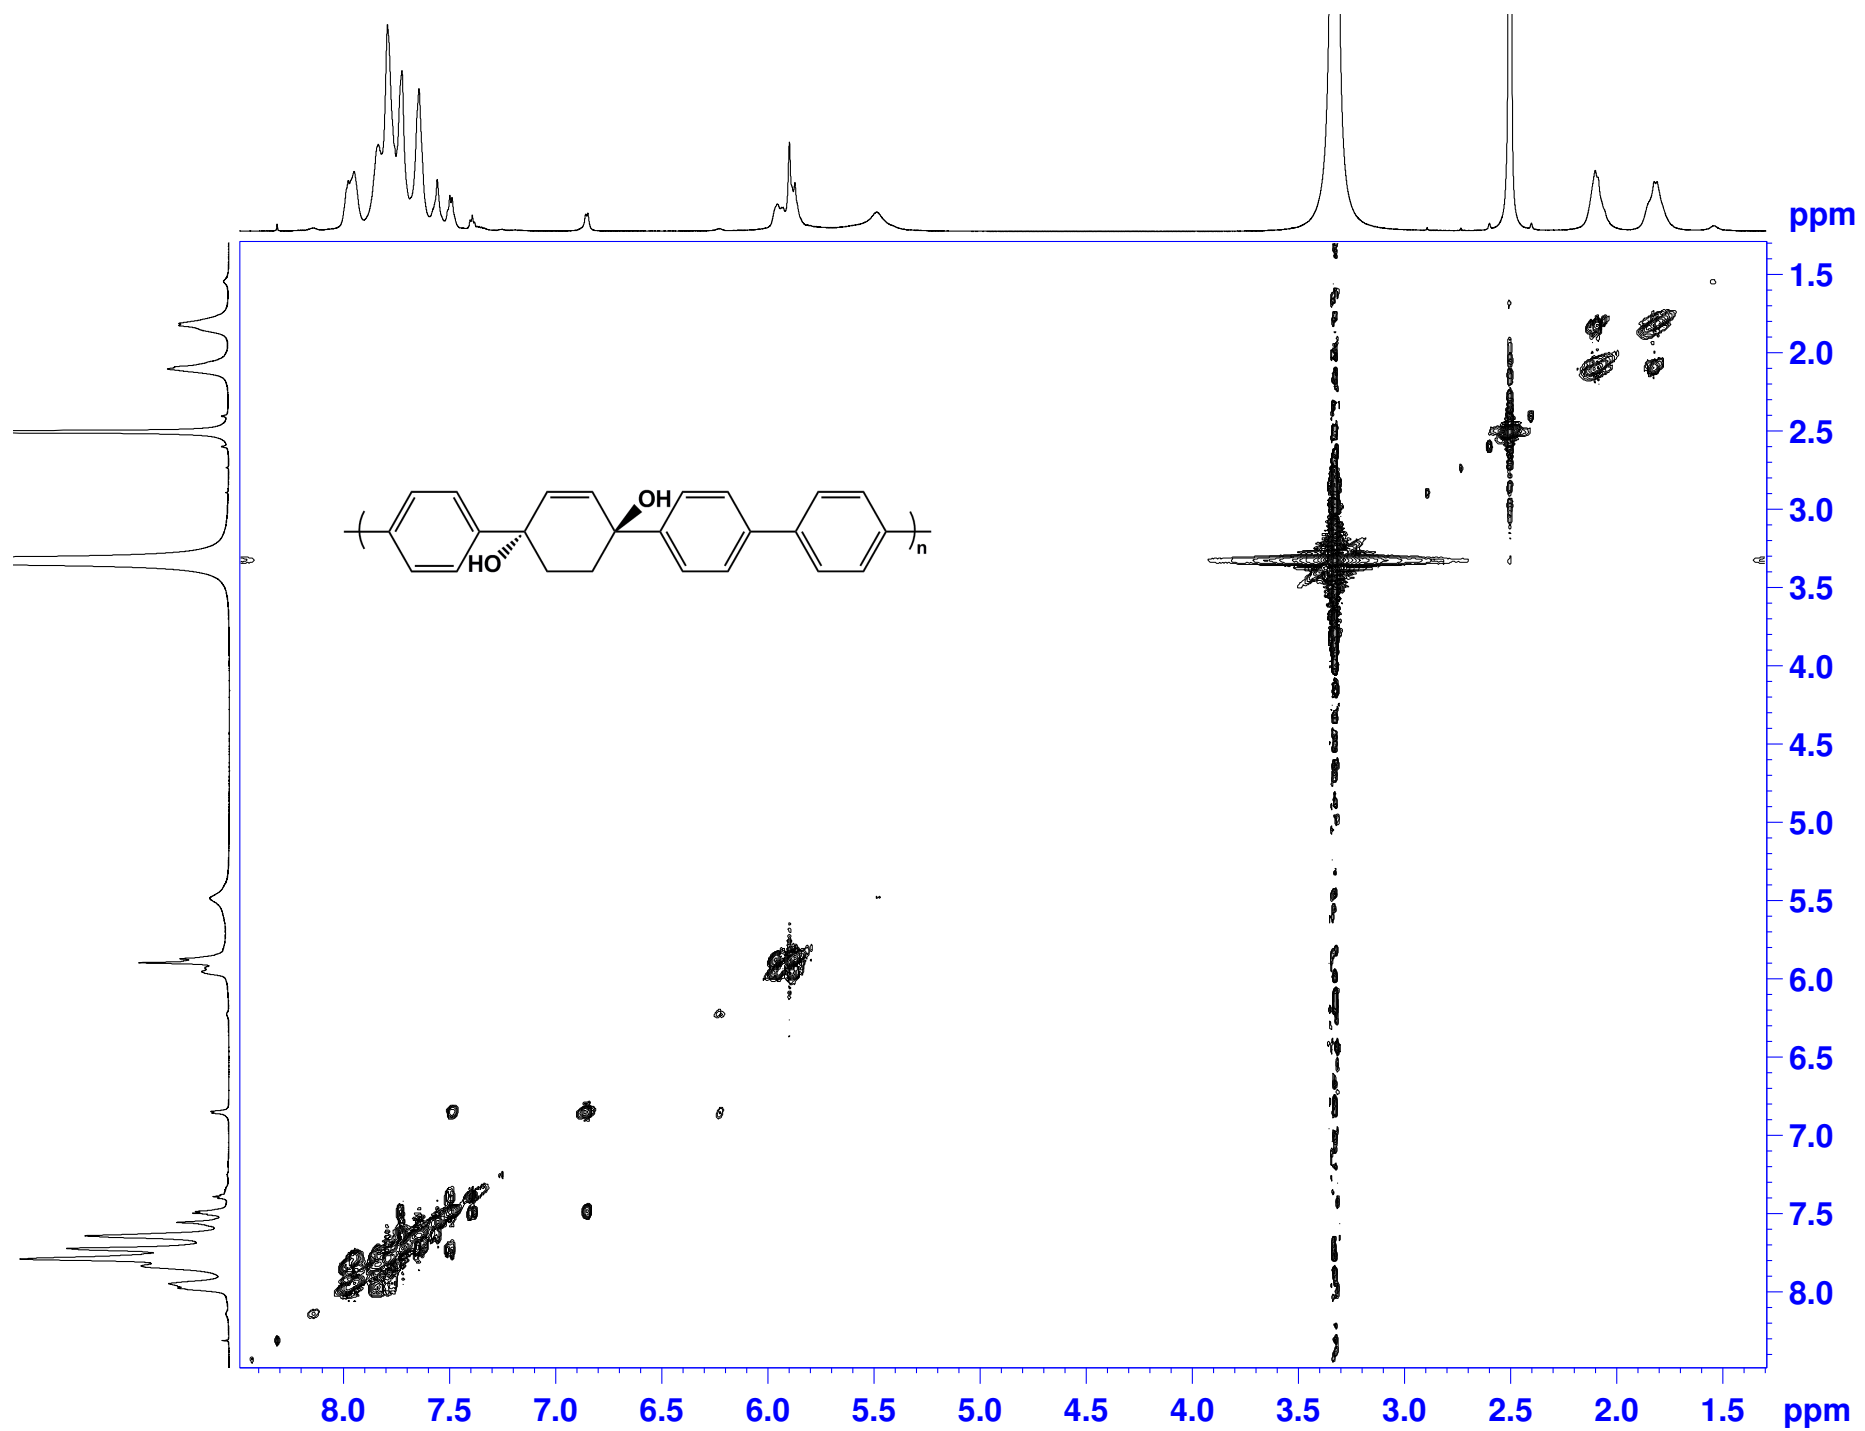

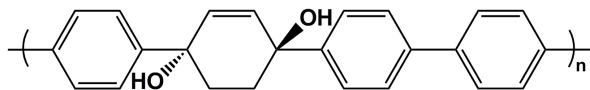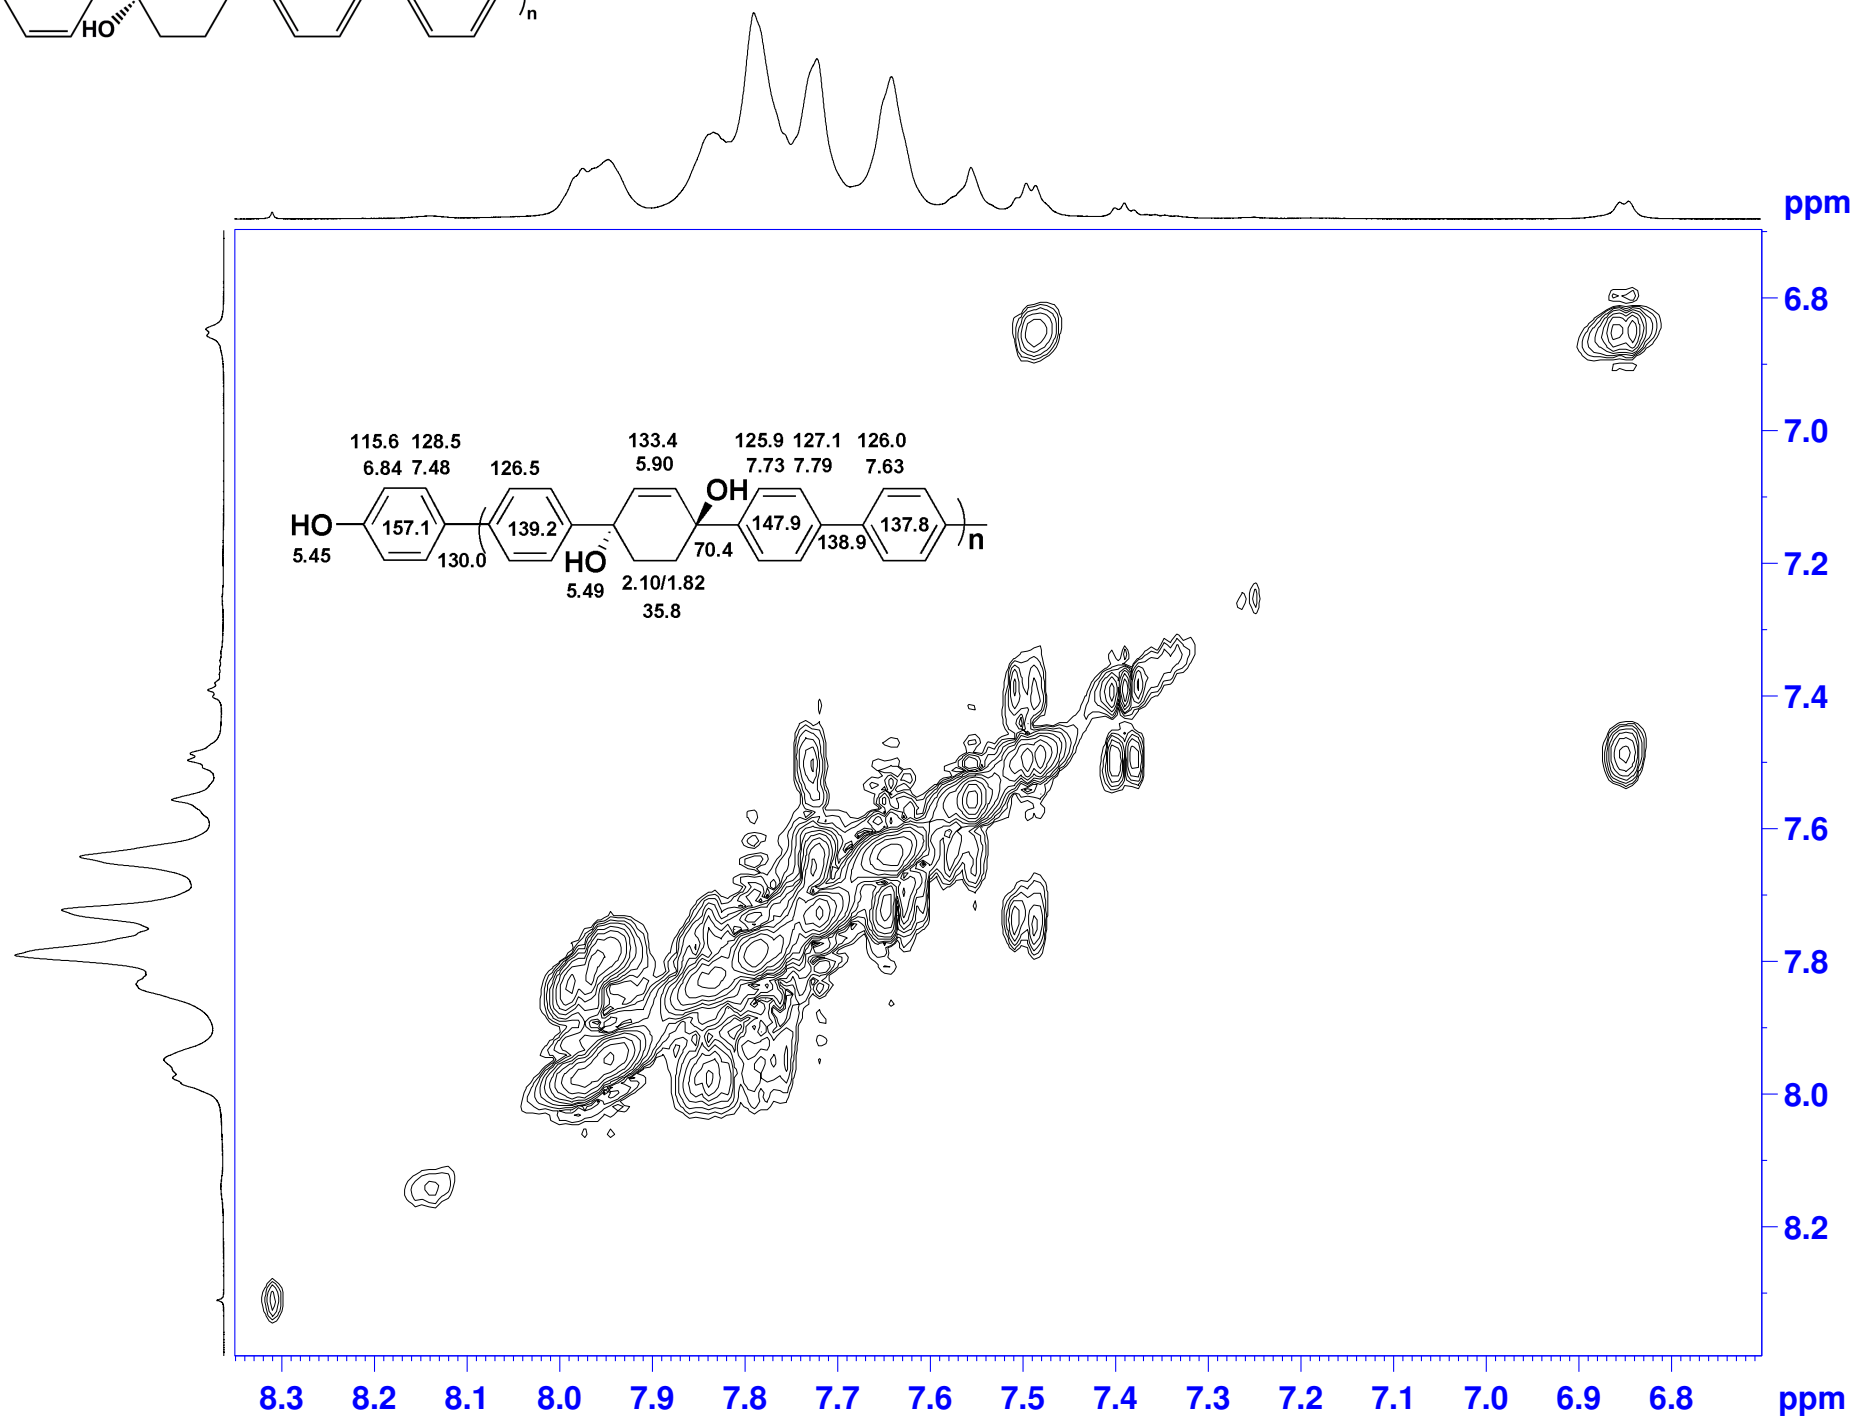

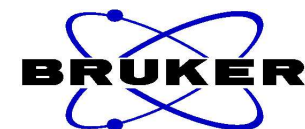

Current Data Parameters  
 NAME DPA-148\_reprecipitated\_Soxhlet\_so  
 EXPNO 2  
 PROCNO 1

F2 - Acquisition Parameters  
 Date\_ 20110724  
 Time 21.22  
 INSTRUM spect  
 PROBHD 5 mm Dual 13C/  
 PULPROG zgdc  
 TD 32768  
 SOLVENT CDCl3  
 NS 40000  
 DS 0  
 SWH 19723.865 Hz  
 FIDRES 0.601925 Hz  
 AQ 0.8307188 sec  
 RG 5792.6  
 DW 25.350 usec  
 DE 9.46 usec  
 TE 299.2 K  
 D1 0.1000000 sec  
 d11 0.0300000 sec  
 TD0 1

===== CHANNEL f1 =====  
 NUC1 13C  
 P1 3.00 usec  
 PL1 -5.00 dB  
 SFO1 75.4759867 MHz

===== CHANNEL f2 =====  
 CPDPRG2 waltz16  
 NUC2 1H  
 PCPD2 100.00 usec  
 PL2 -6.00 dB  
 PL12 12.00 dB  
 SFO2 300.1312000 MHz

F2 - Processing parameters  
 SI 32768  
 SF 75.4677853 MHz  
 WDW EM  
 SSB 0  
 LB 2.00 Hz  
 GB 0  
 PC 1.00

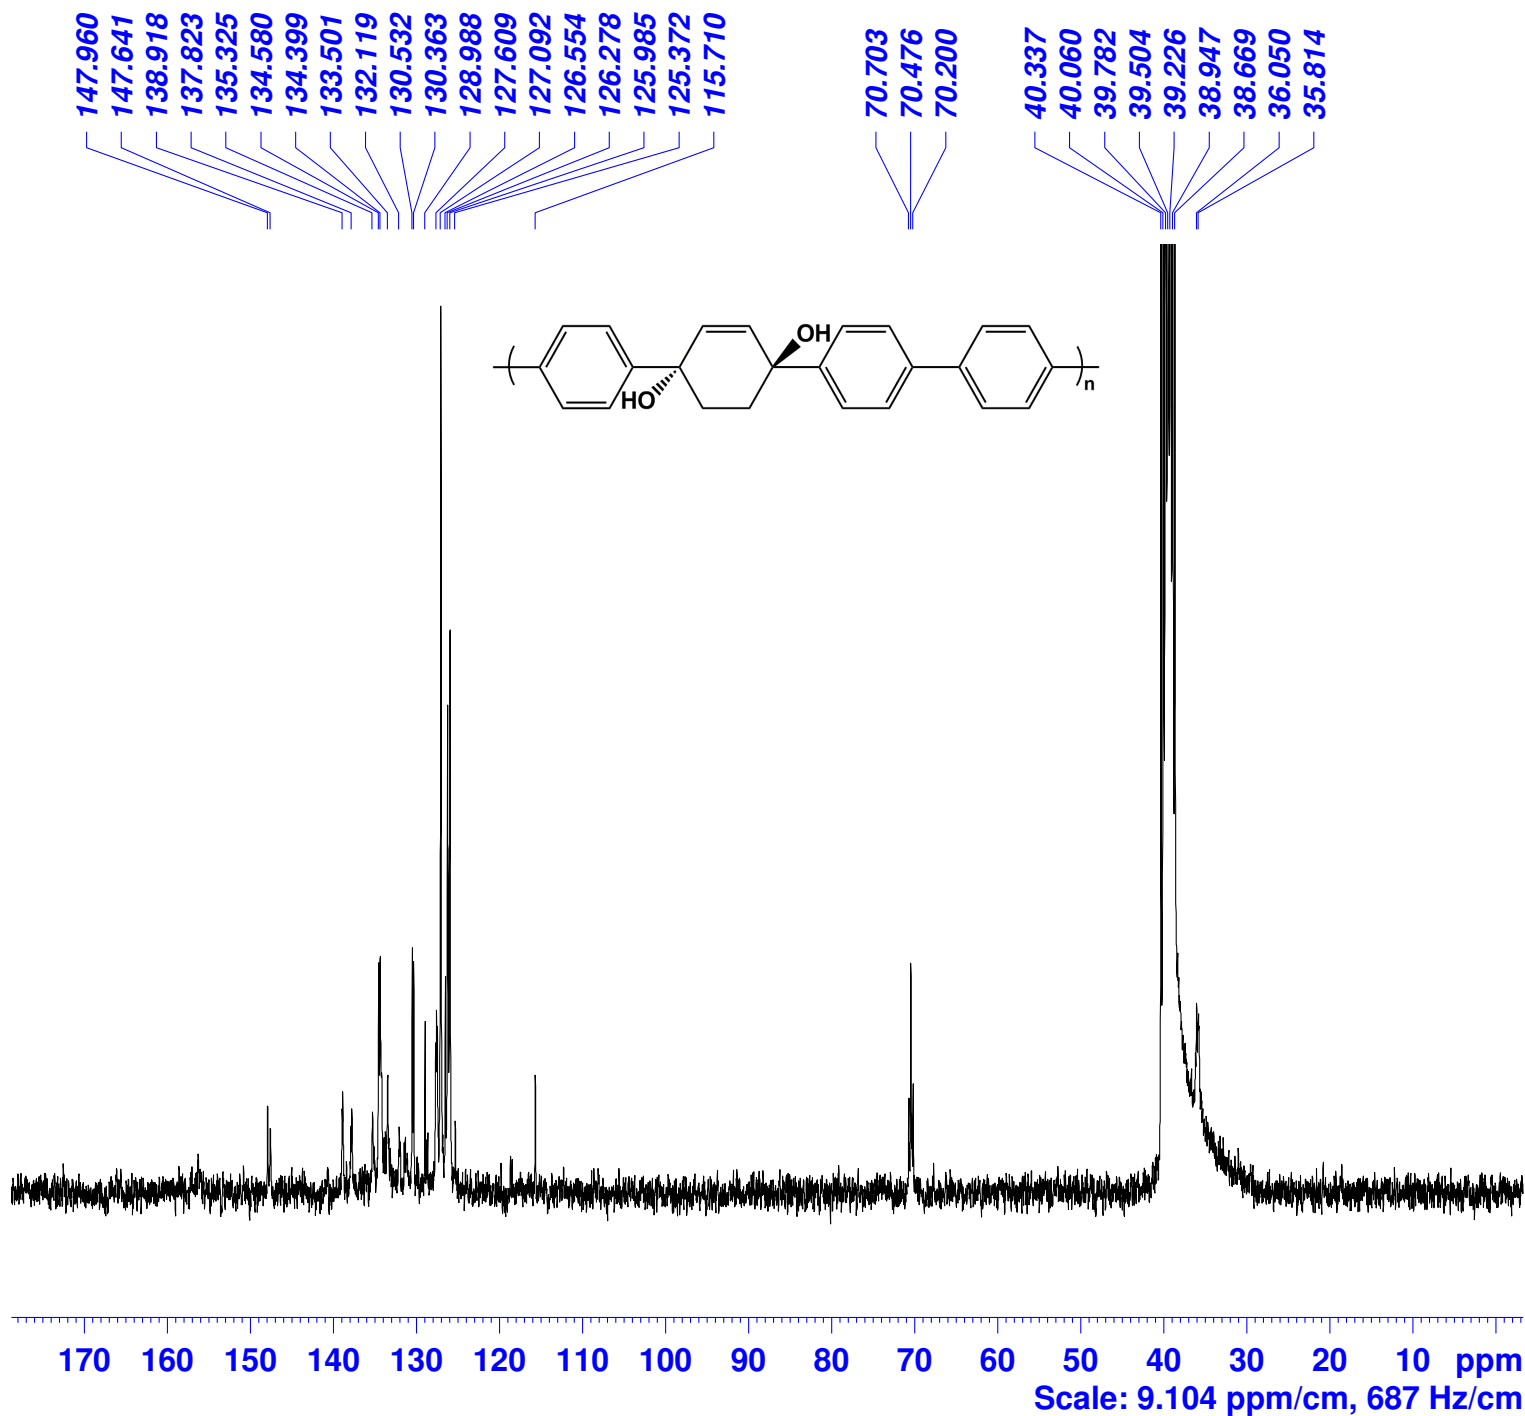

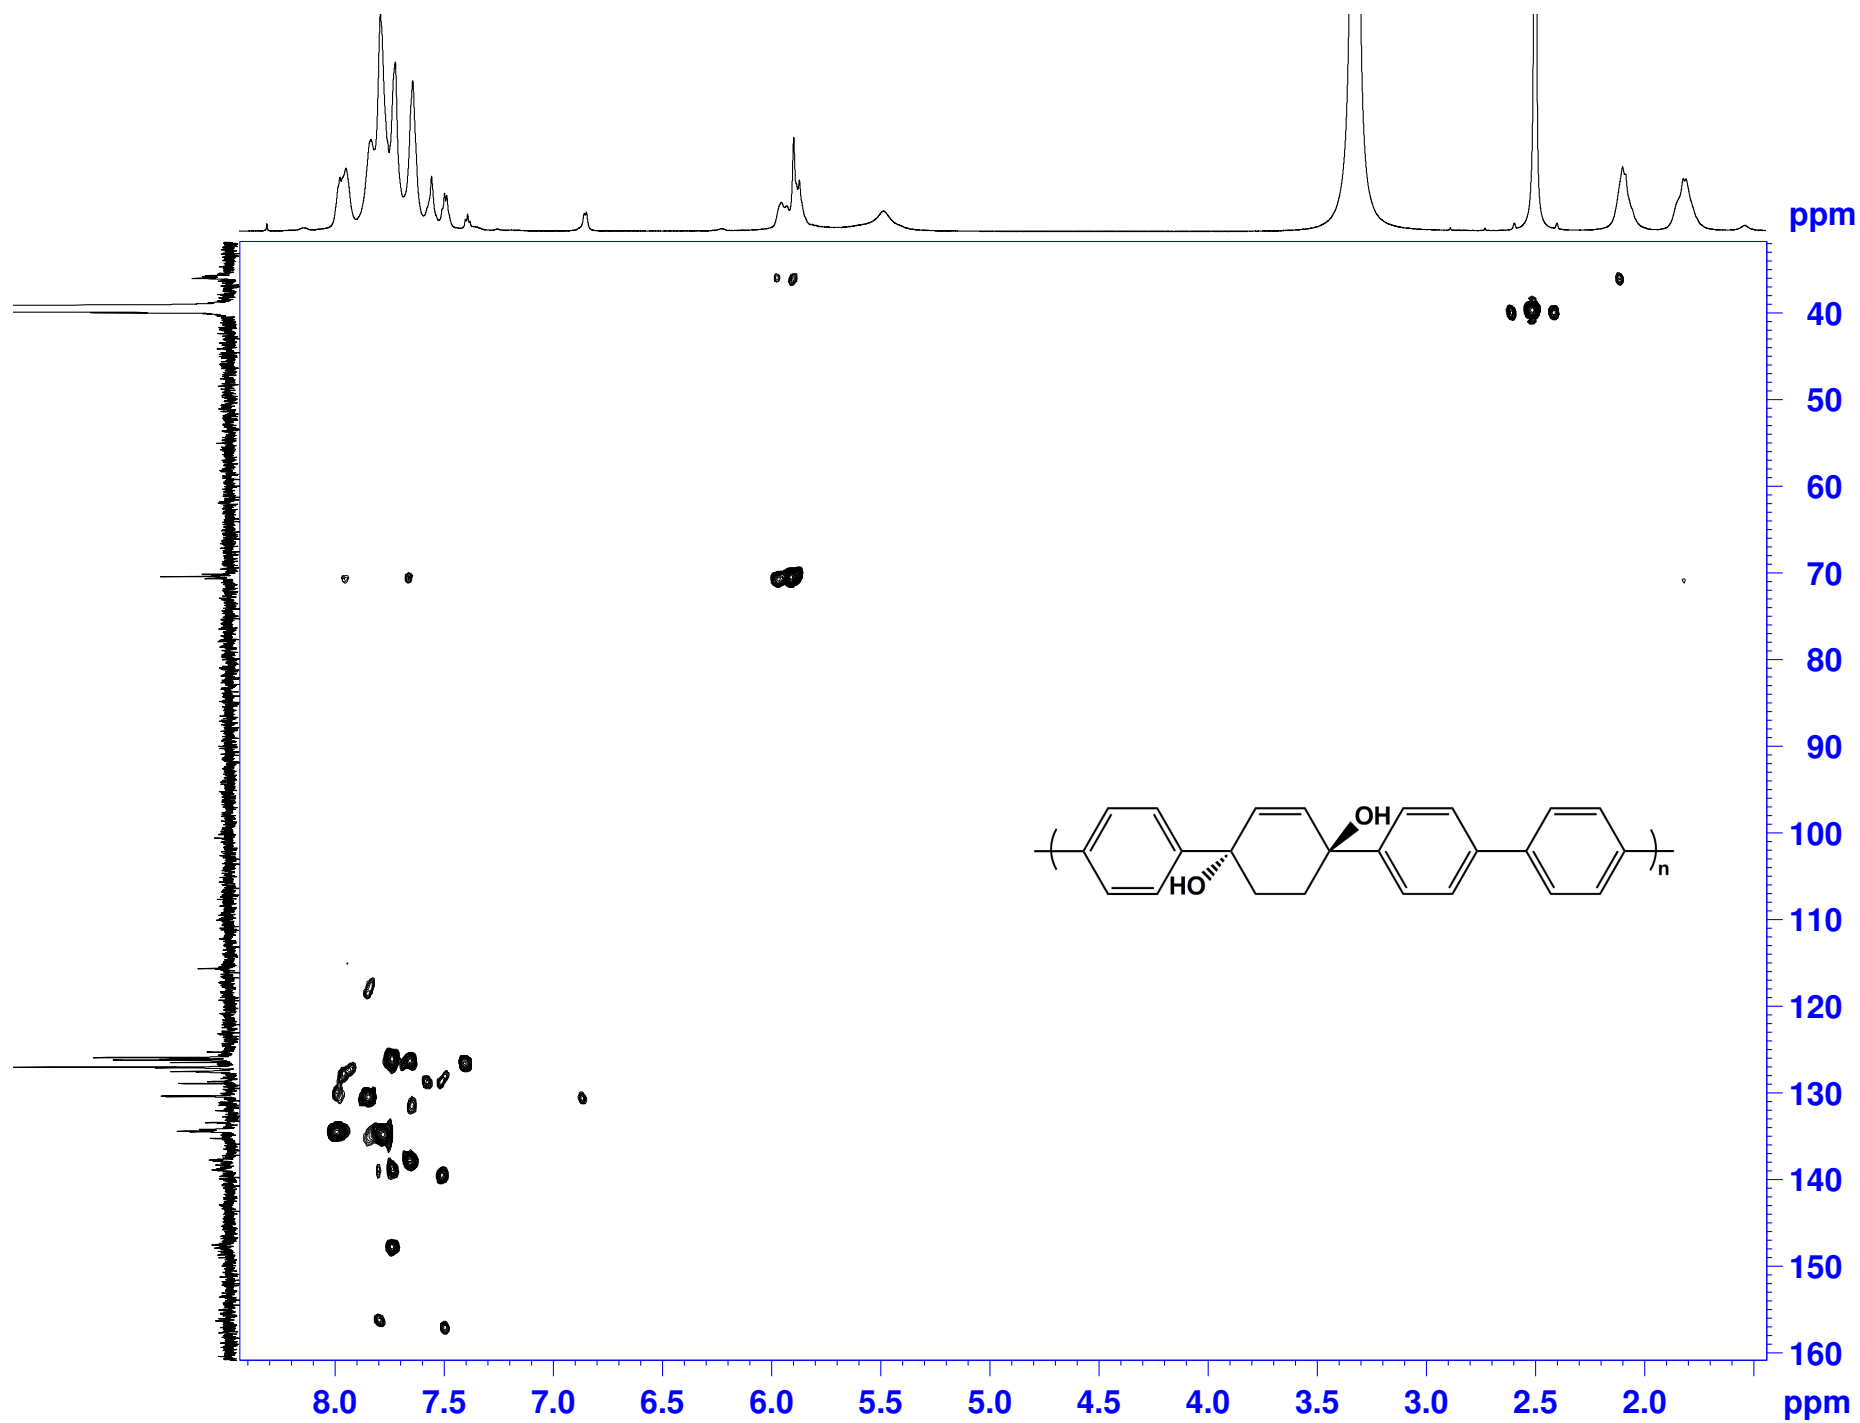

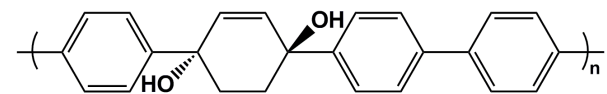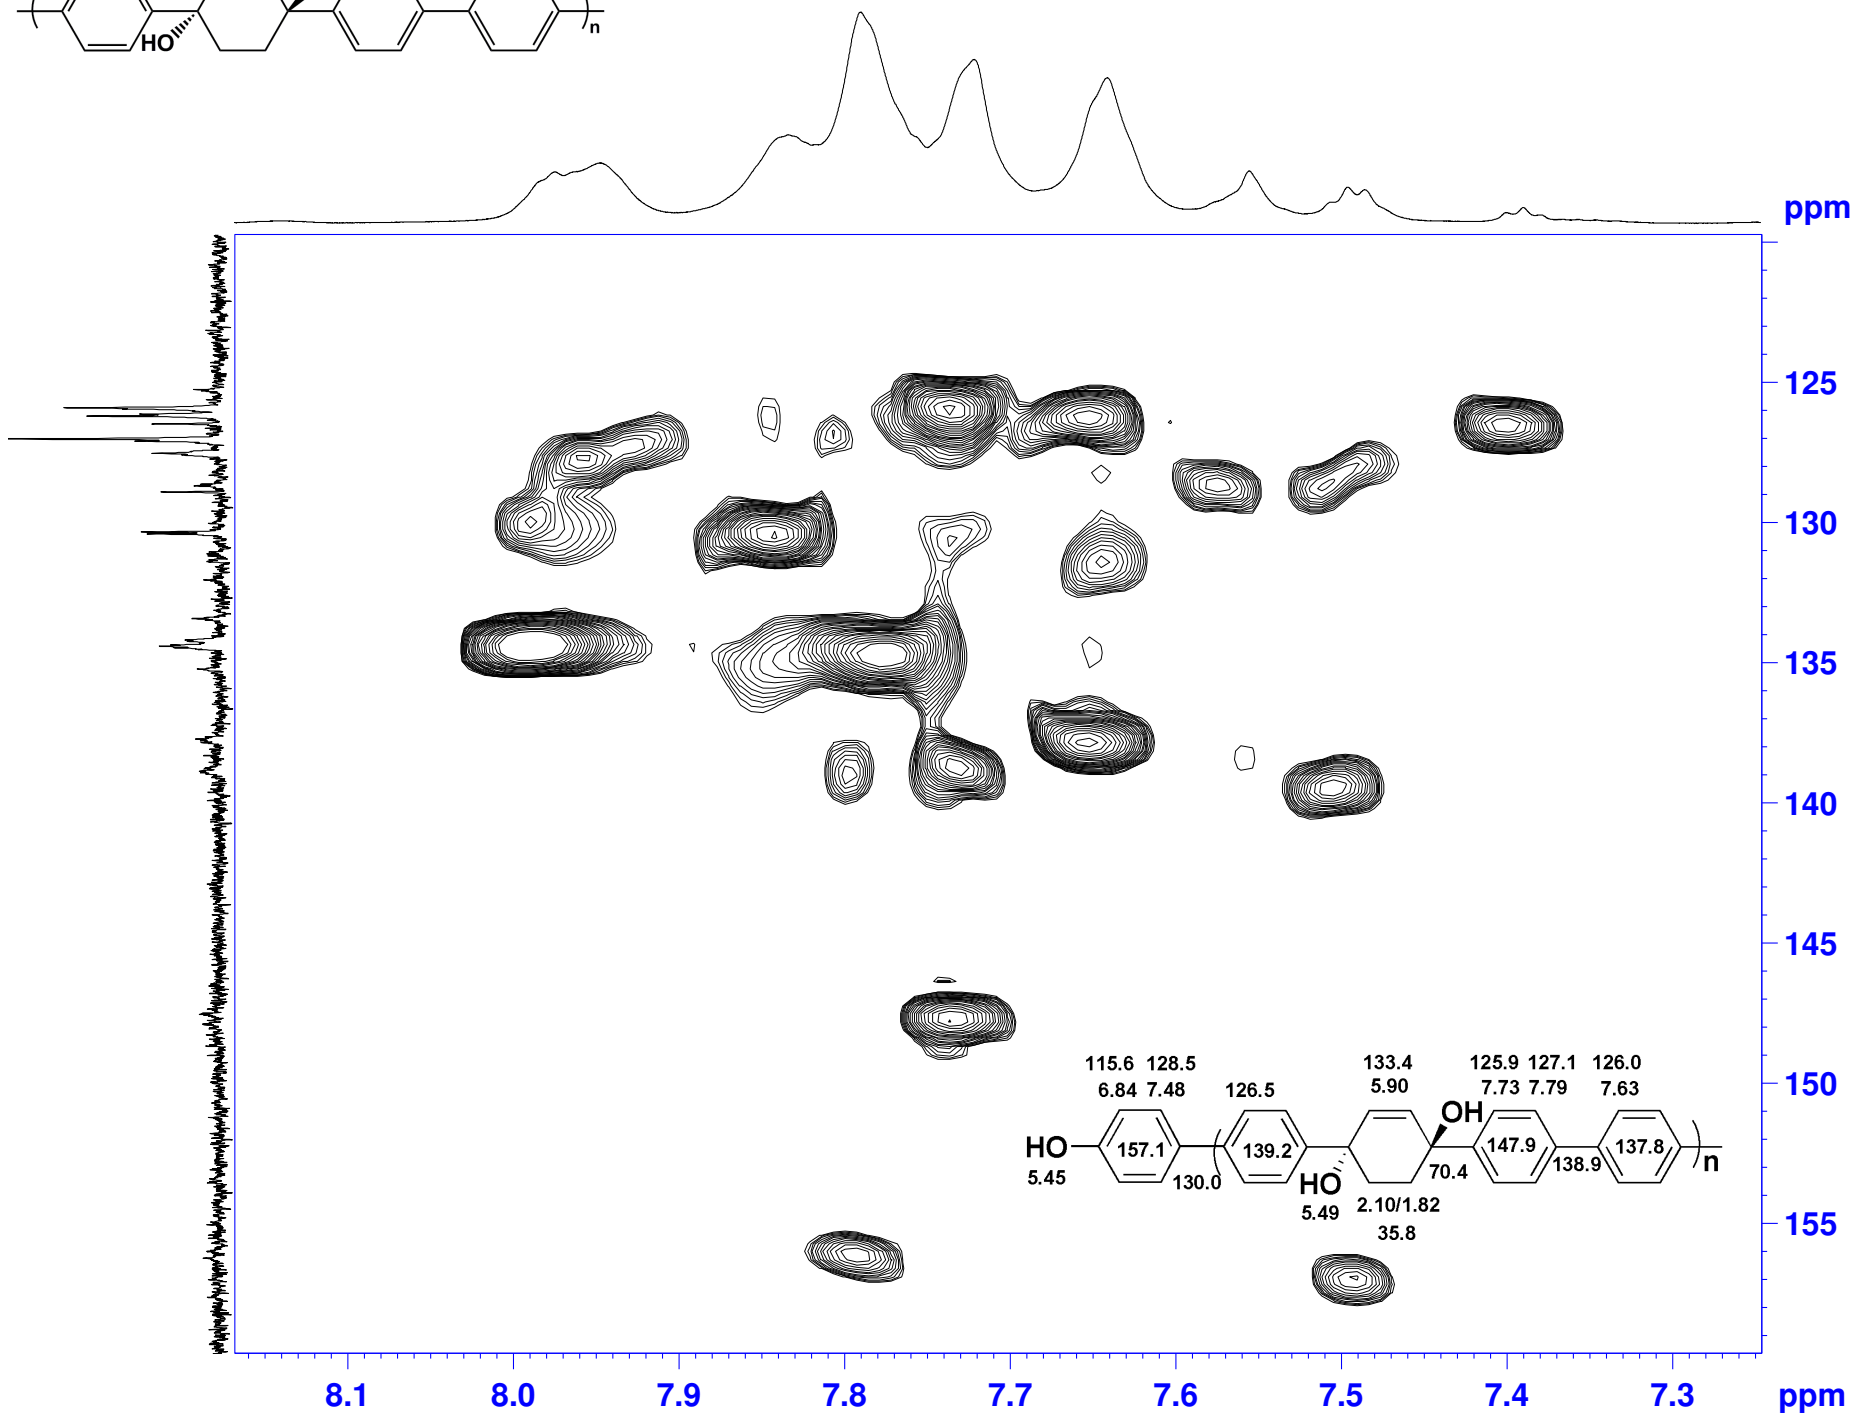



Sample: DPA-148  
Size: 4.7860 mg  
Method: Ramp  
Comment: N2

# TGA

S33

File: C:\...TGA analysis\fd3auj11-101.TGC  
Operator: Sergey  
Run Date: 04-Aug-2011 00:01  
Instrument: TGA Q500 V6.4 Build 193

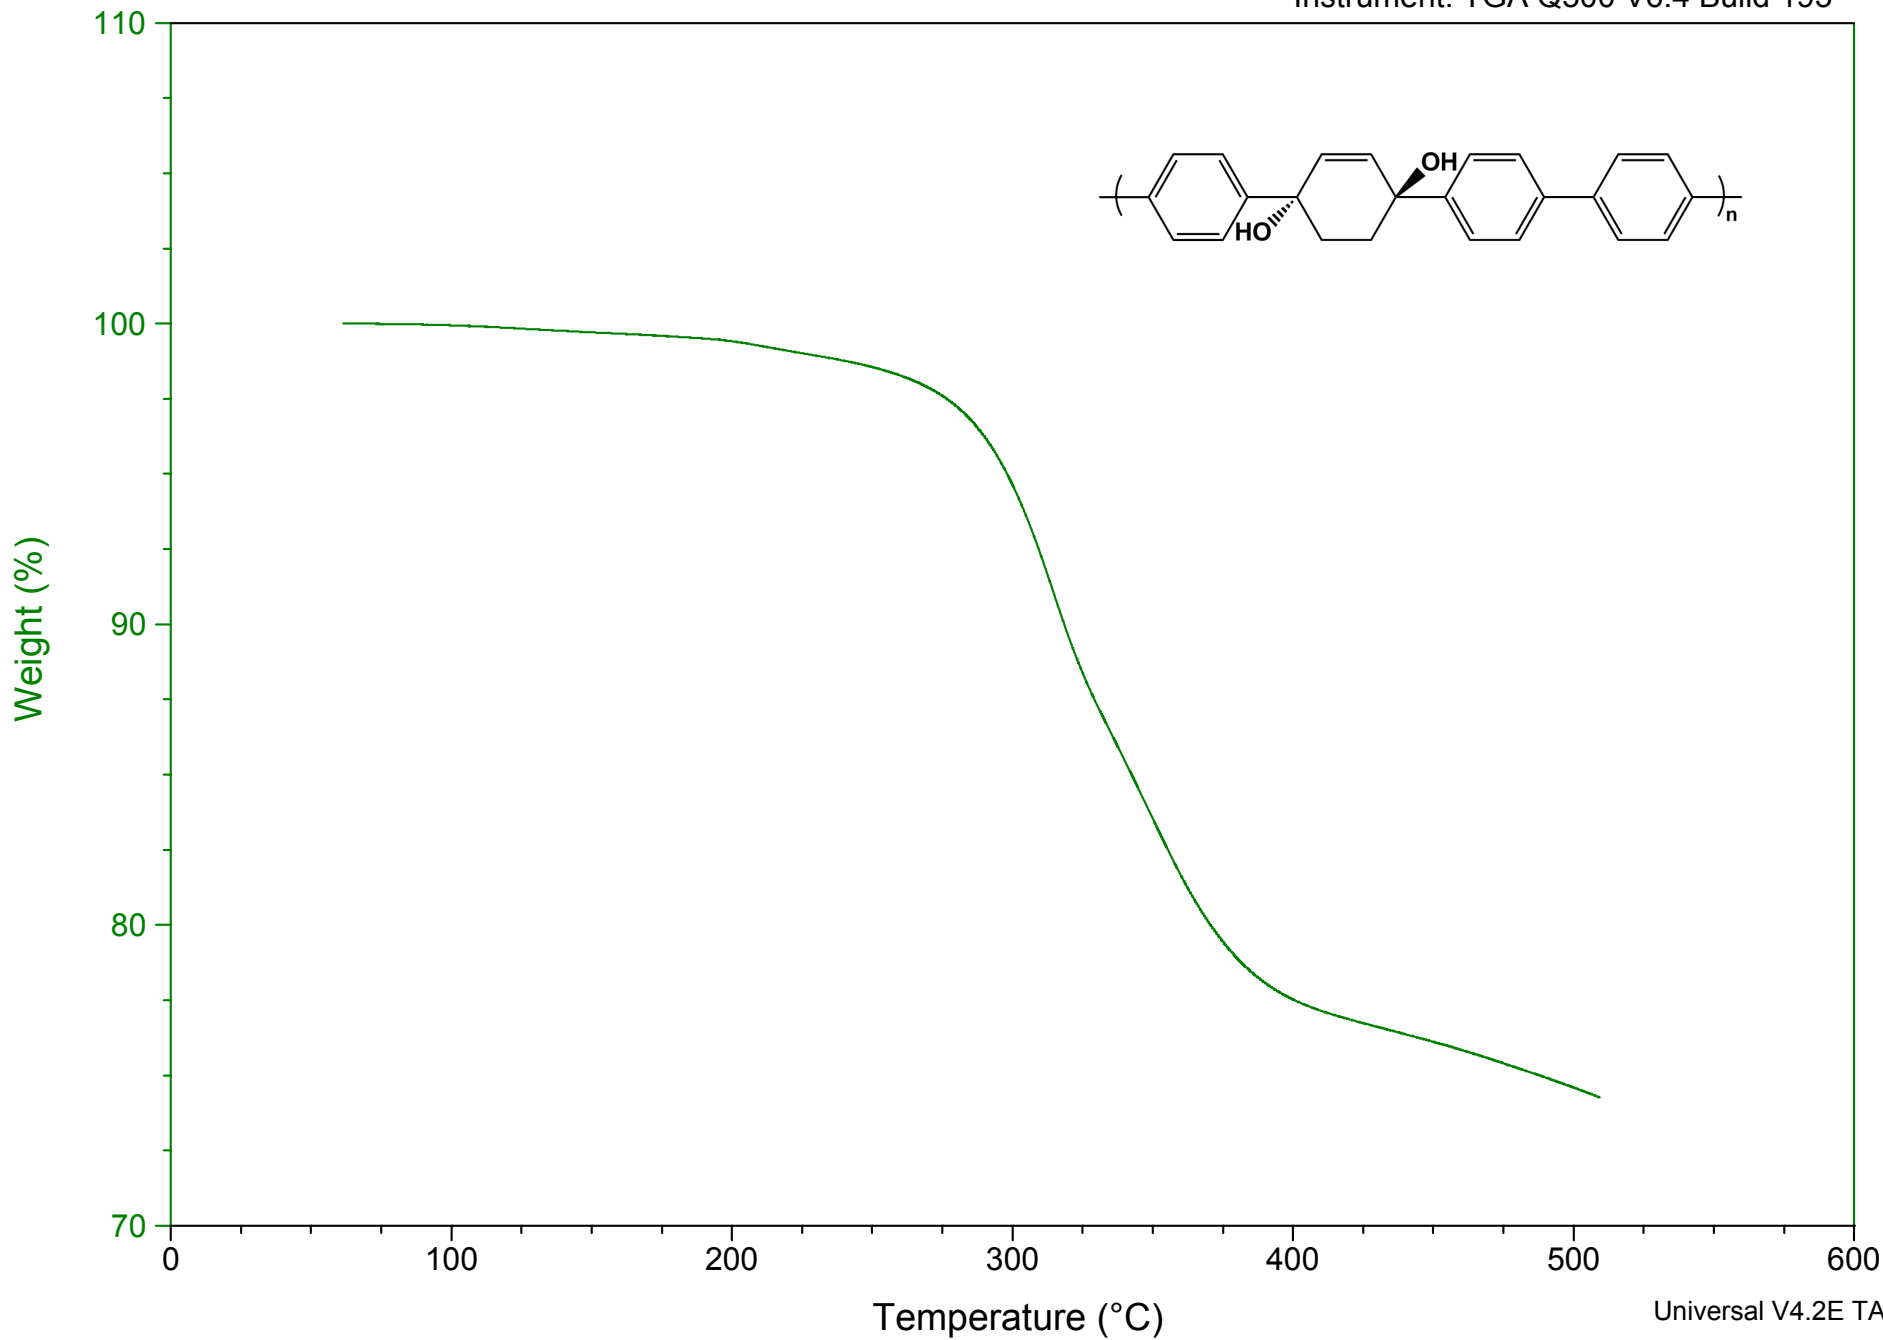

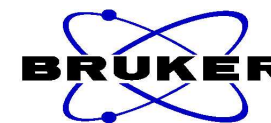

Current Data Parameters  
 NAME DPA-146\_Soxhlet-collPd\_precipitated\_Soxhlet\_s  
 EXPNO 1  
 PROCNO 1

F2 - Acquisition Parameters  
 Date\_ 20110829  
 Time 17.39  
 INSTRUM spect  
 PROBHD 5 mm Dual 13C/  
 PULPROG zg  
 TD 32768  
 SOLVENT DMSO  
 NS 128  
 DS 0  
 SWH 4194.631 Hz  
 FIDRES 0.128010 Hz  
 AQ 3.9059956 sec  
 RG 406.4  
 DW 119.200 usec  
 DE 6.00 usec  
 TE 303.2 K  
 DI 0.1000000 sec  
 TDO 1

----- CHANNEL f1 -----  
 NUC1 1H  
 P1 9.00 usec  
 PL1 -3.00 dB  
 SFO1 300.1319000 MHz

F2 - Processing parameters  
 SI 32768  
 SF 300.1300008 MHz  
 WDW EM  
 SSB 0  
 LB 0.00 Hz  
 GB 0  
 PC 0.50

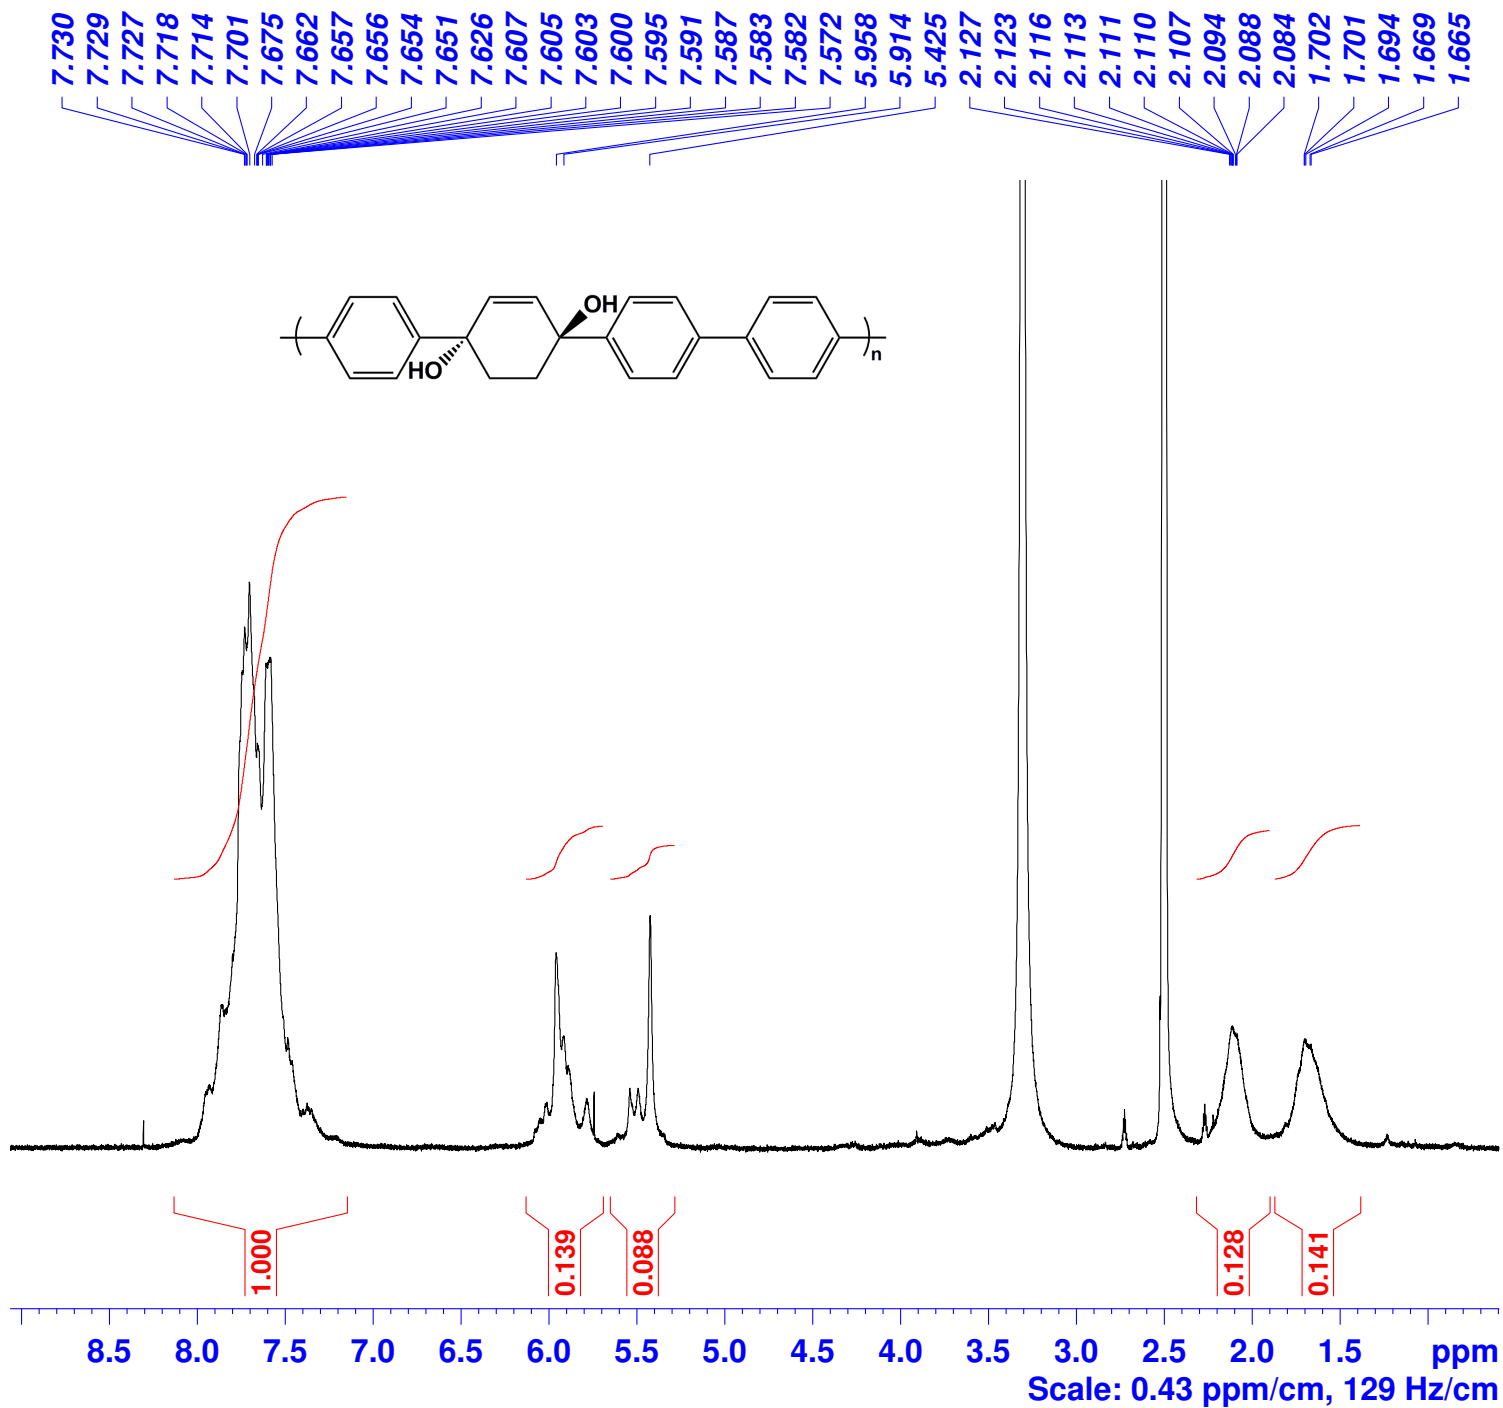

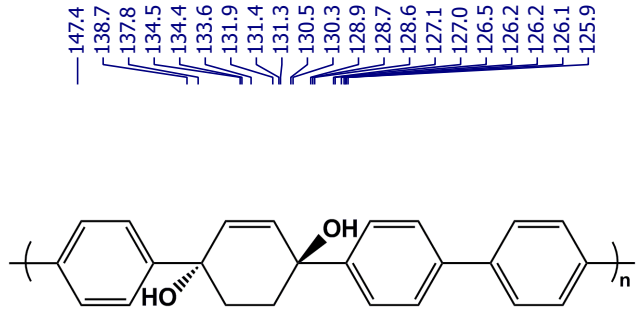

147.4  
138.7  
137.8  
134.5  
134.4  
133.6  
131.9  
131.4  
131.3  
130.5  
130.3  
128.9  
128.7  
128.6  
127.1  
127.0  
126.5  
126.2  
126.2  
126.1  
125.9

70.8

40.3  
40.0  
39.8  
39.2  
38.9  
38.7  
36.0

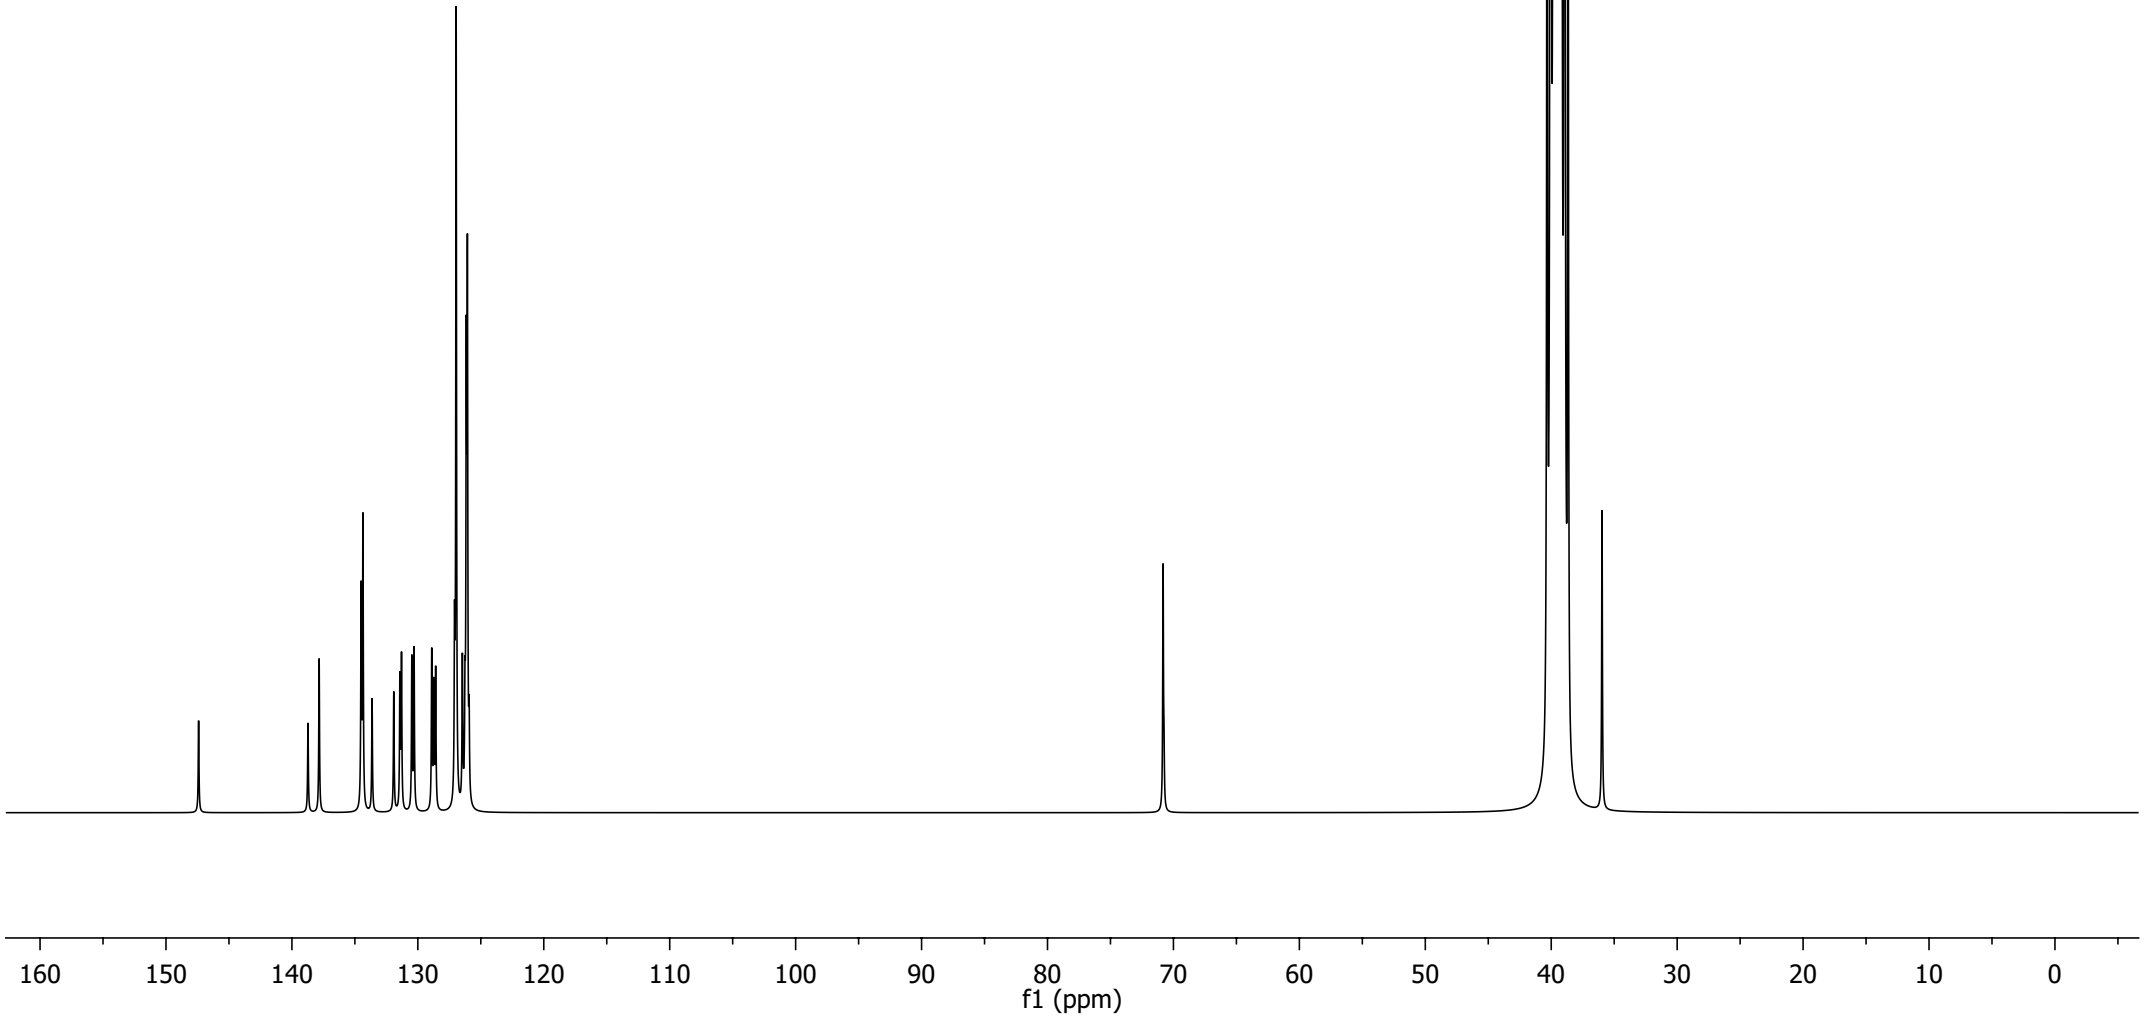

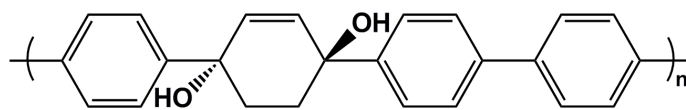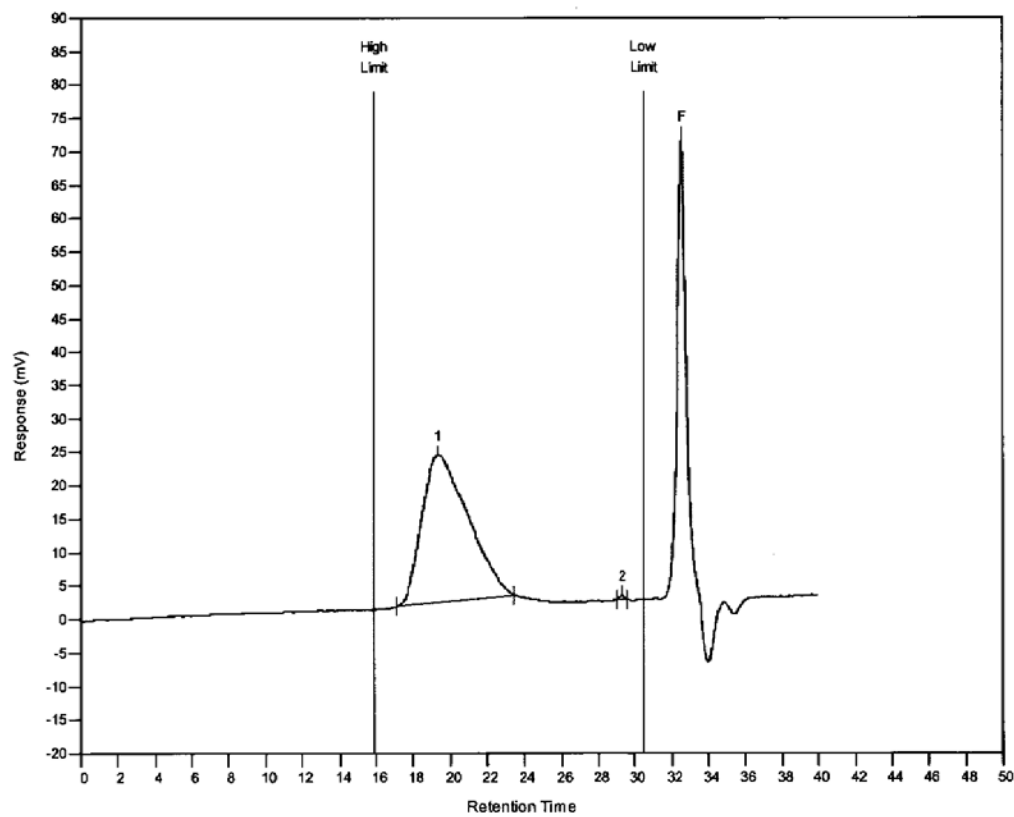

#### MW Averages

| Peak No | Mp    | Mn   | Mw    | Mz    | Mz+1  | Mv    | PD       |
|---------|-------|------|-------|-------|-------|-------|----------|
| 1       | 16040 | 9387 | 15016 | 22812 | 31484 | 14023 | 1.59966  |
| 2       | 269   | 270  | 269   | 270   | 271   | 268   | 0.996296 |
| 3       | 42    | 40   | 42    | 44    | 45    | 42    | 1.05     |

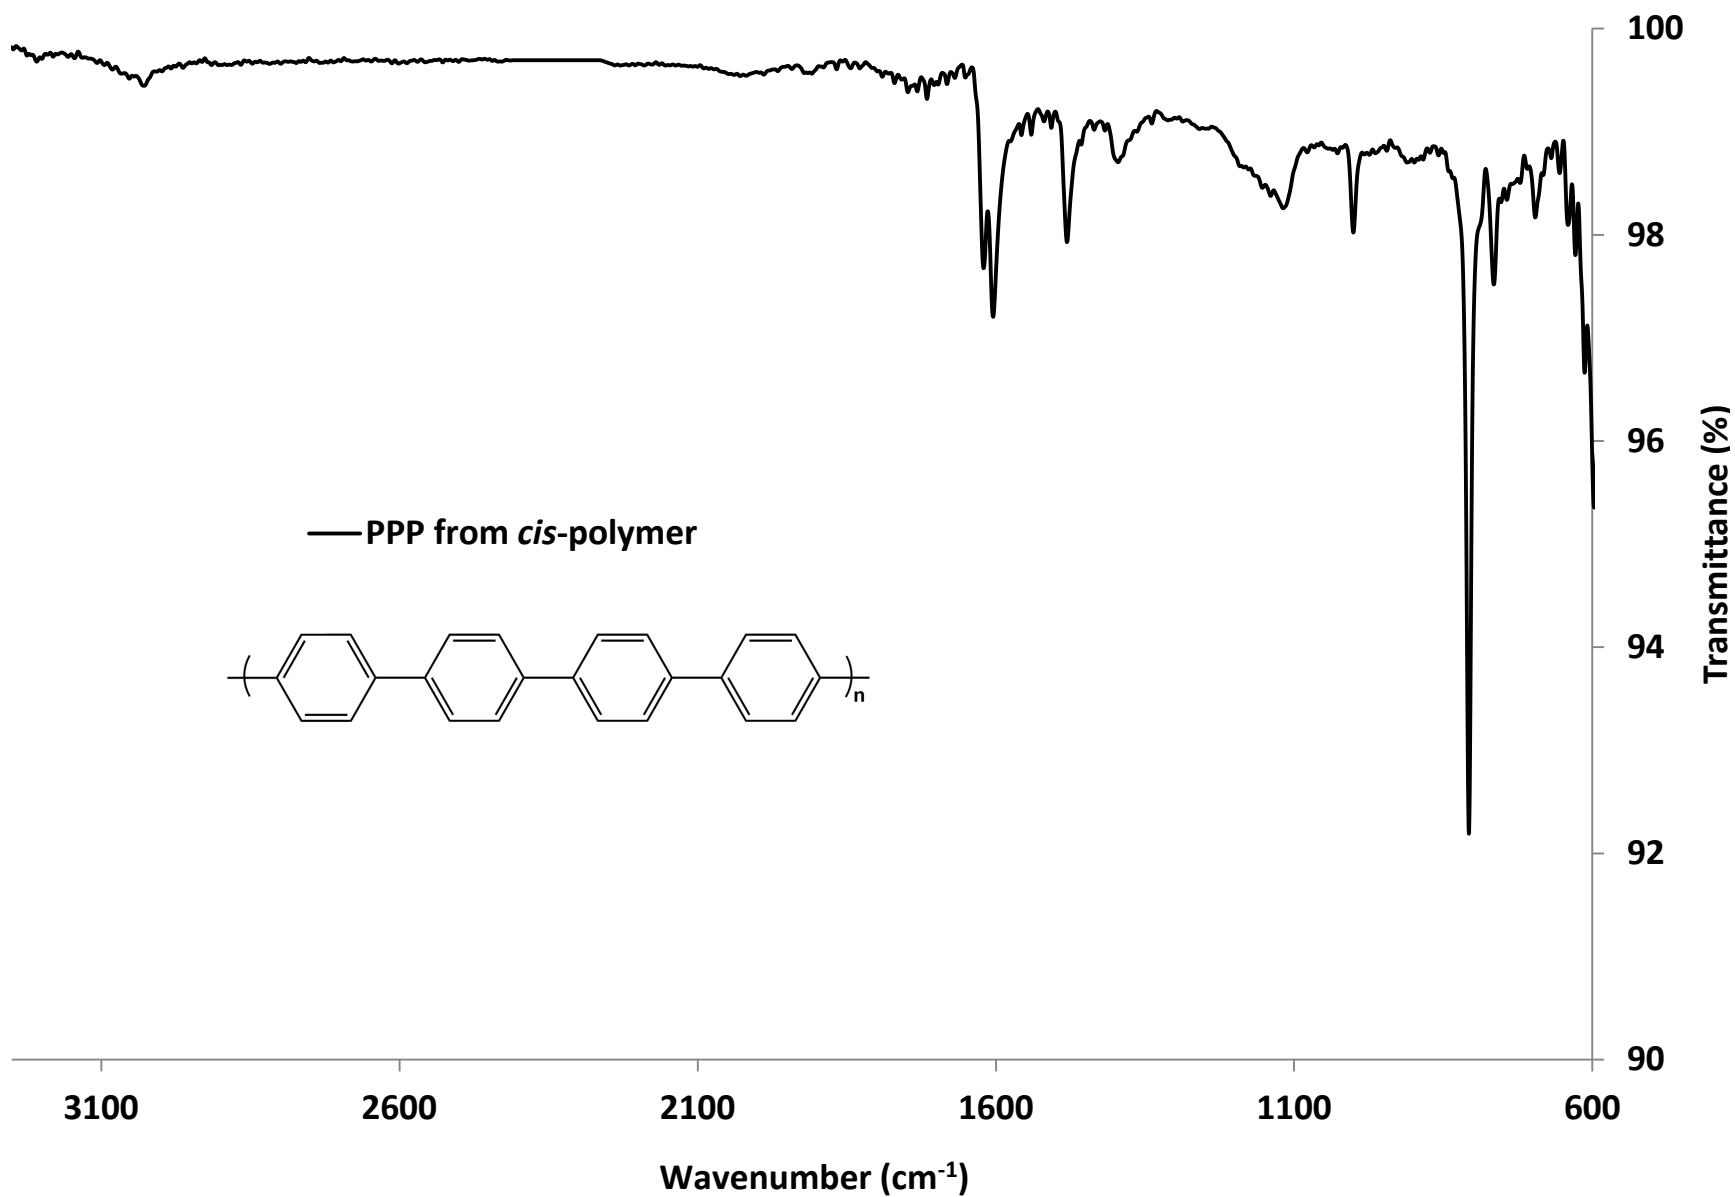IR spectrum of PPP obtained by pyrolysis of *cis*-polymer (*cis*-1a)

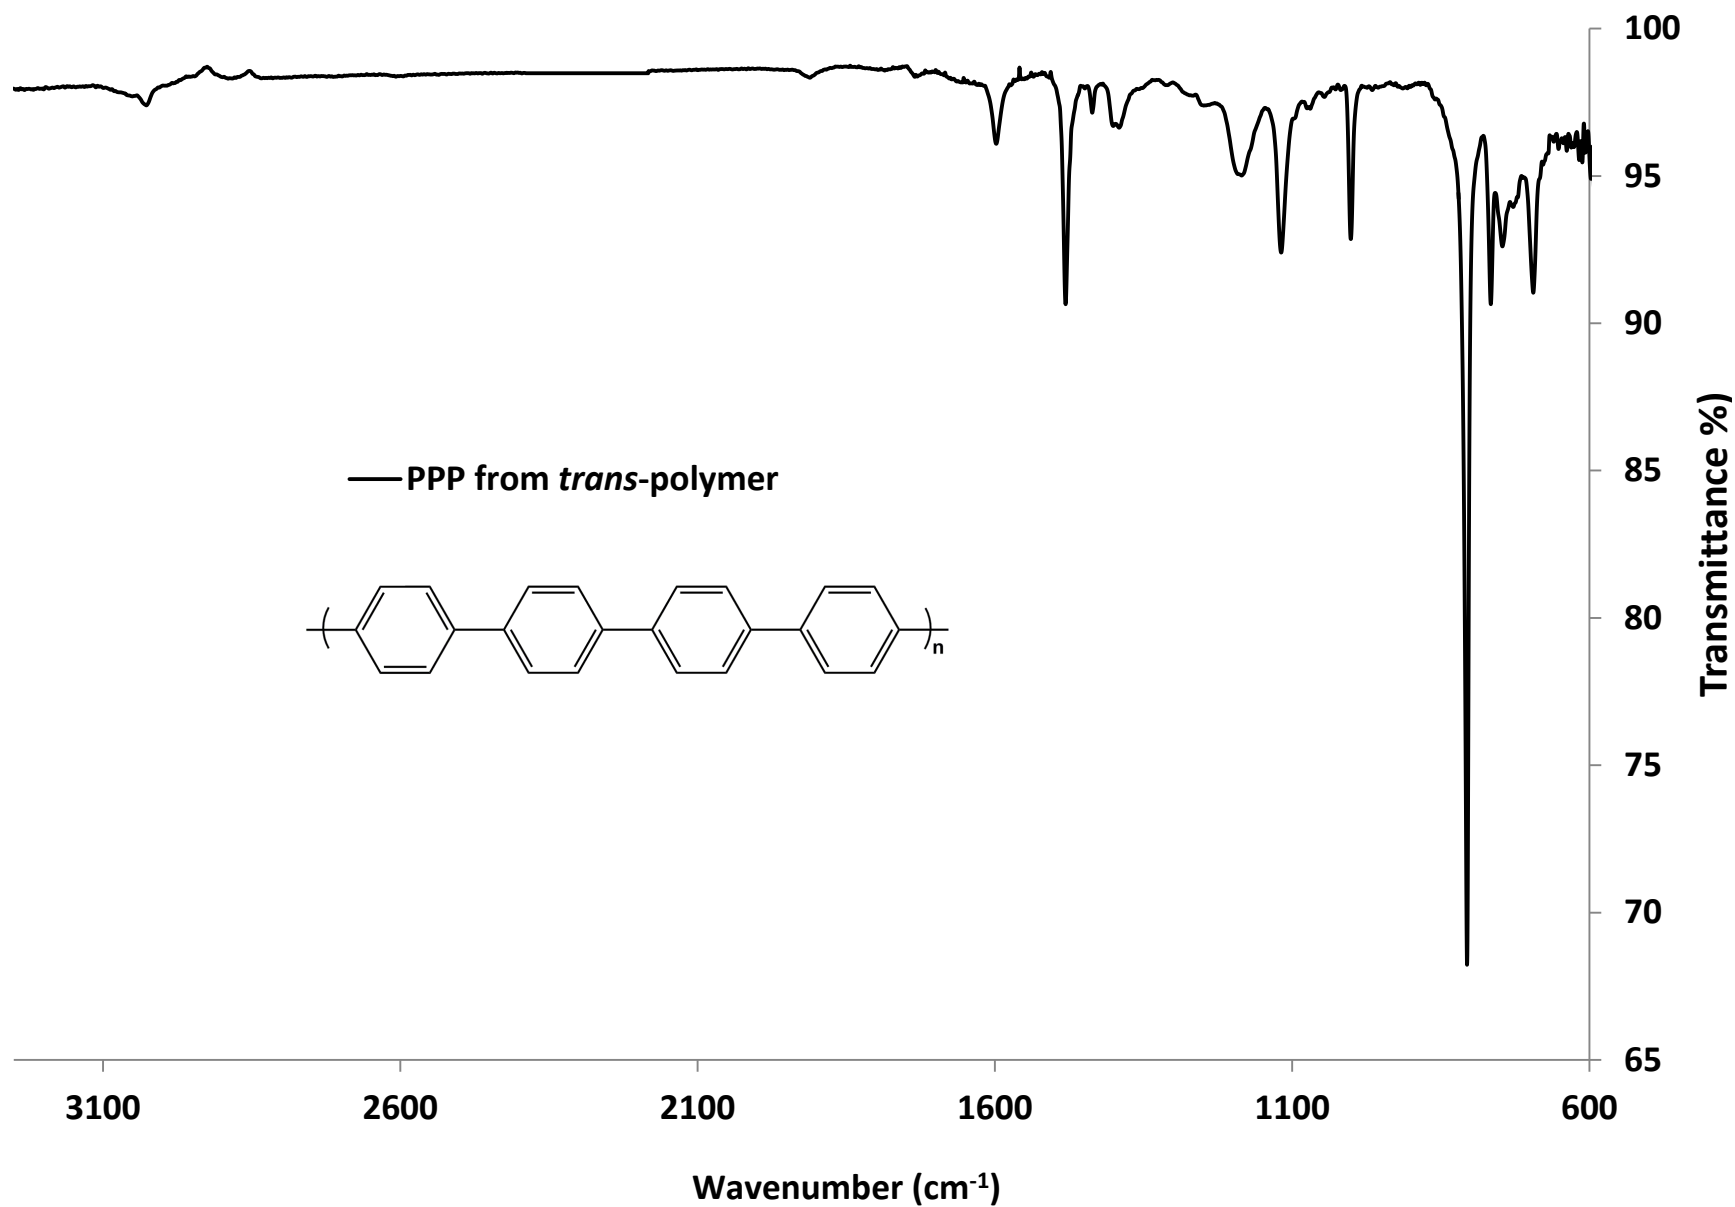

IR spectrum of PPP obtained by pyrolysis of *trans*-polymer (*trans*-1b)

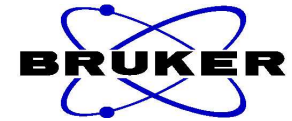

Current Data Parameters  
 NAME DPA-159-xtals  
 EXPNO 1  
 PROCNO 1

F2 - Acquisition Parameter  
 Date\_ 20110814  
 Time 12.14  
 INSTRUM spect  
 PROBHD 5 mm CPTCI 1H-  
 PULPROG zg30  
 TD 65536  
 SOLVENT CDC13  
 NS 8  
 DS 0  
 SWH 9803.922 Hz  
 FIDRES 0.149596 Hz  
 AQ 3.3423860 se  
 RG 7.12  
 DW 51.000 us  
 DE 6.50 us  
 TE 318.0 K  
 D1 1.00000000 se  
 TD0 1

===== CHANNEL f1 =====  
 NUC1 1H  
 P1 8.42 us  
 PL1 4.00 dB  
 PL1W 9.00000000 W  
 SFO1 700.4542027 MH

F2 - Processing parameters  
 SI 65536  
 SF 700.4500353 MH  
 WDW EM  
 SSB 0  
 LB 0.00 Hz  
 GB 0  
 PC 1.00

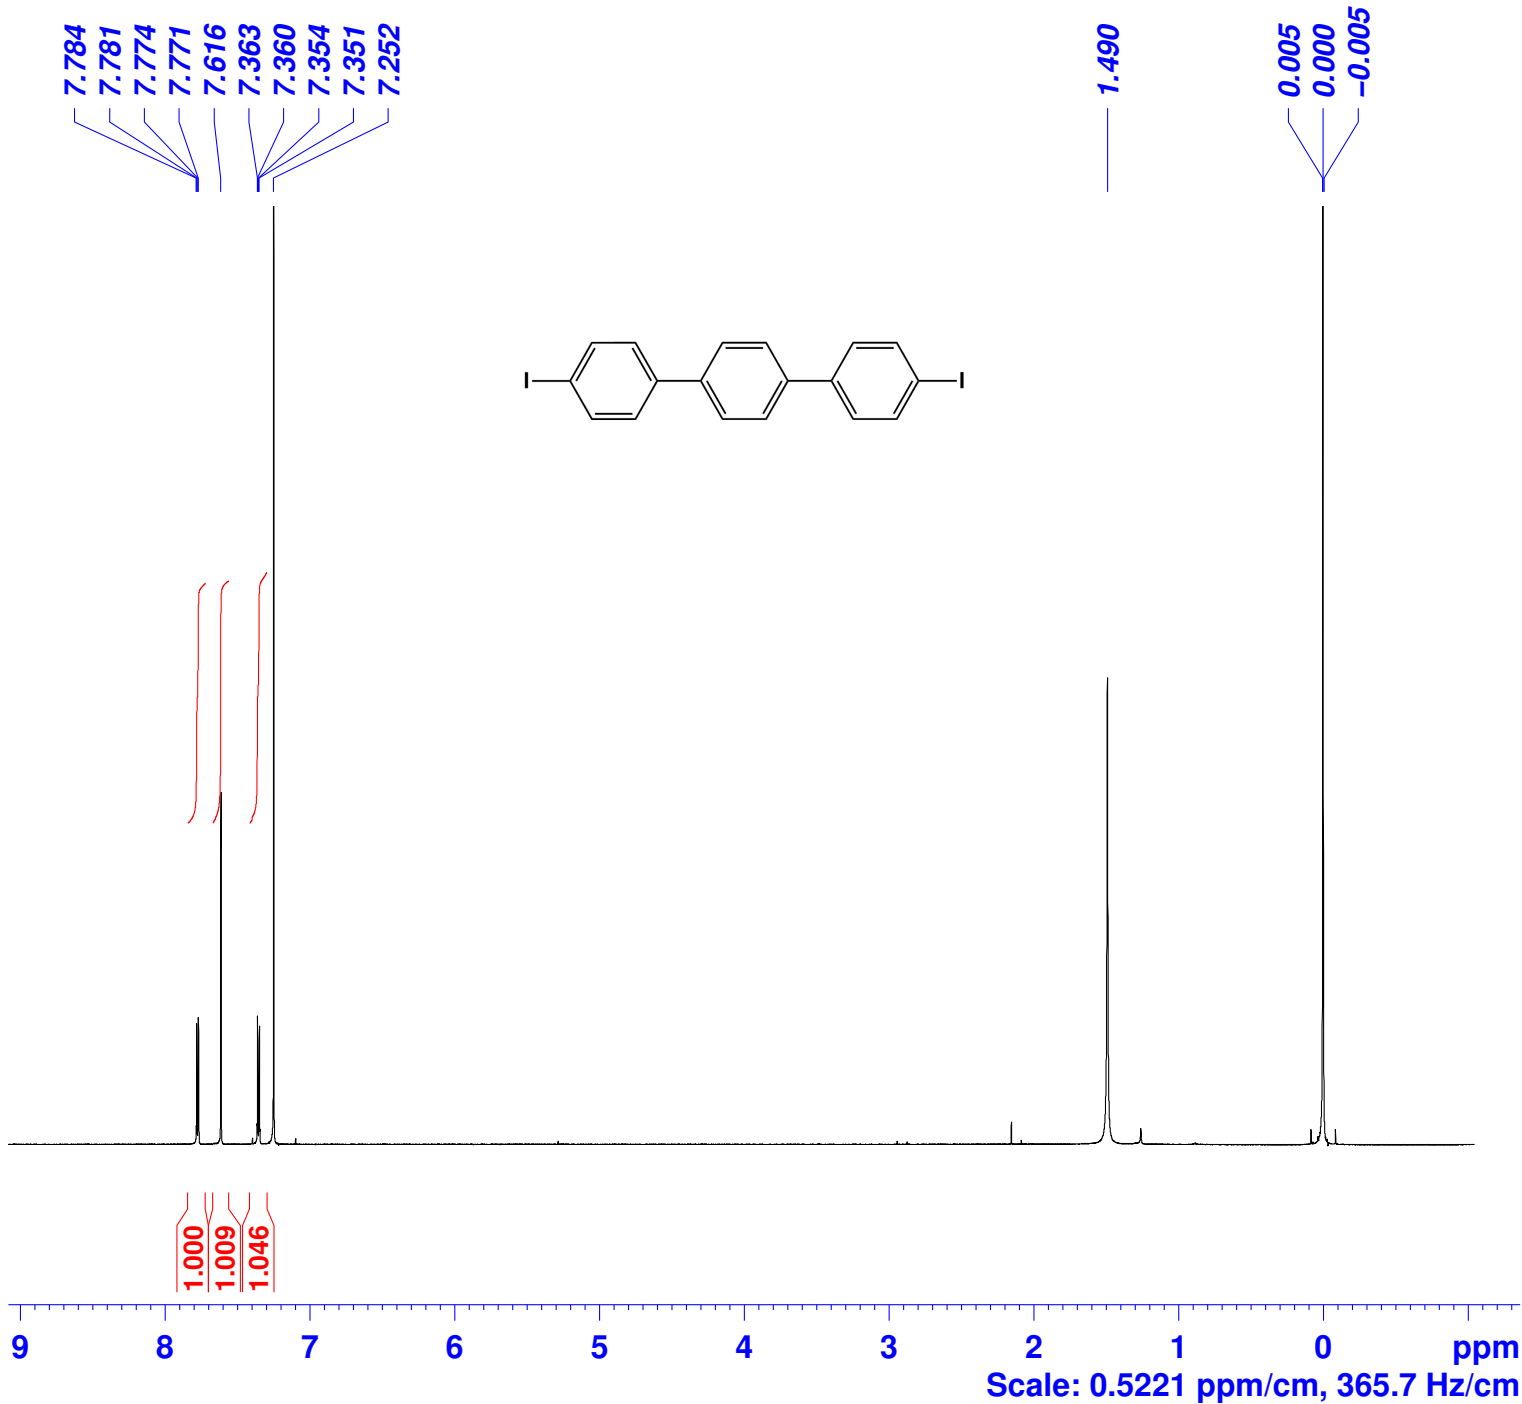



Current Data Parameters  
 NAME DPA-159 crystals 700 M  
 EXPNO 2  
 PROCNO 1

F2 - Acquisition Parameters  
 Date\_ 20110814  
 Time 12.17  
 INSTRUM spect  
 PROBHD 5 mm CPTCI 1H-  
 PULPROG zgdc30  
 TD 65356  
 SOLVENT CDCl3  
 NS 1569  
 DS 0  
 SWH 42613.637 Hz  
 FIDRES 0.652023 Hz  
 AQ 0.7668937 sec  
 RG 1620  
 DW 11.733 usec  
 DE 20.00 usec  
 TE 318.0 K  
 D1 0.30000001 sec  
 D11 0.03000000 sec  
 TDO 1

==== CHANNEL f1 =====  
 NUC1 13C  
 P1 14.00 usec  
 PL1 7.00 dB  
 PL1W 18.94487762 W  
 SFO1 176.1476671 MHz

==== CHANNEL f2 =====  
 CPDPRG2 waltz16  
 NUC2 1H  
 PCPD2 65.00 usec  
 PL2 4.00 dB  
 PL12 21.75 dB  
 PL2W 9.00000000 W  
 PL12W 0.15102178 W  
 SFO2 700.4531737 MHz

F2 - Processing parameters  
 SI 65356  
 SF 176.1282817 MHz  
 WDW EM  
 SSB 0  
 LB 2.00 Hz  
 GB 0  
 PC 1.40

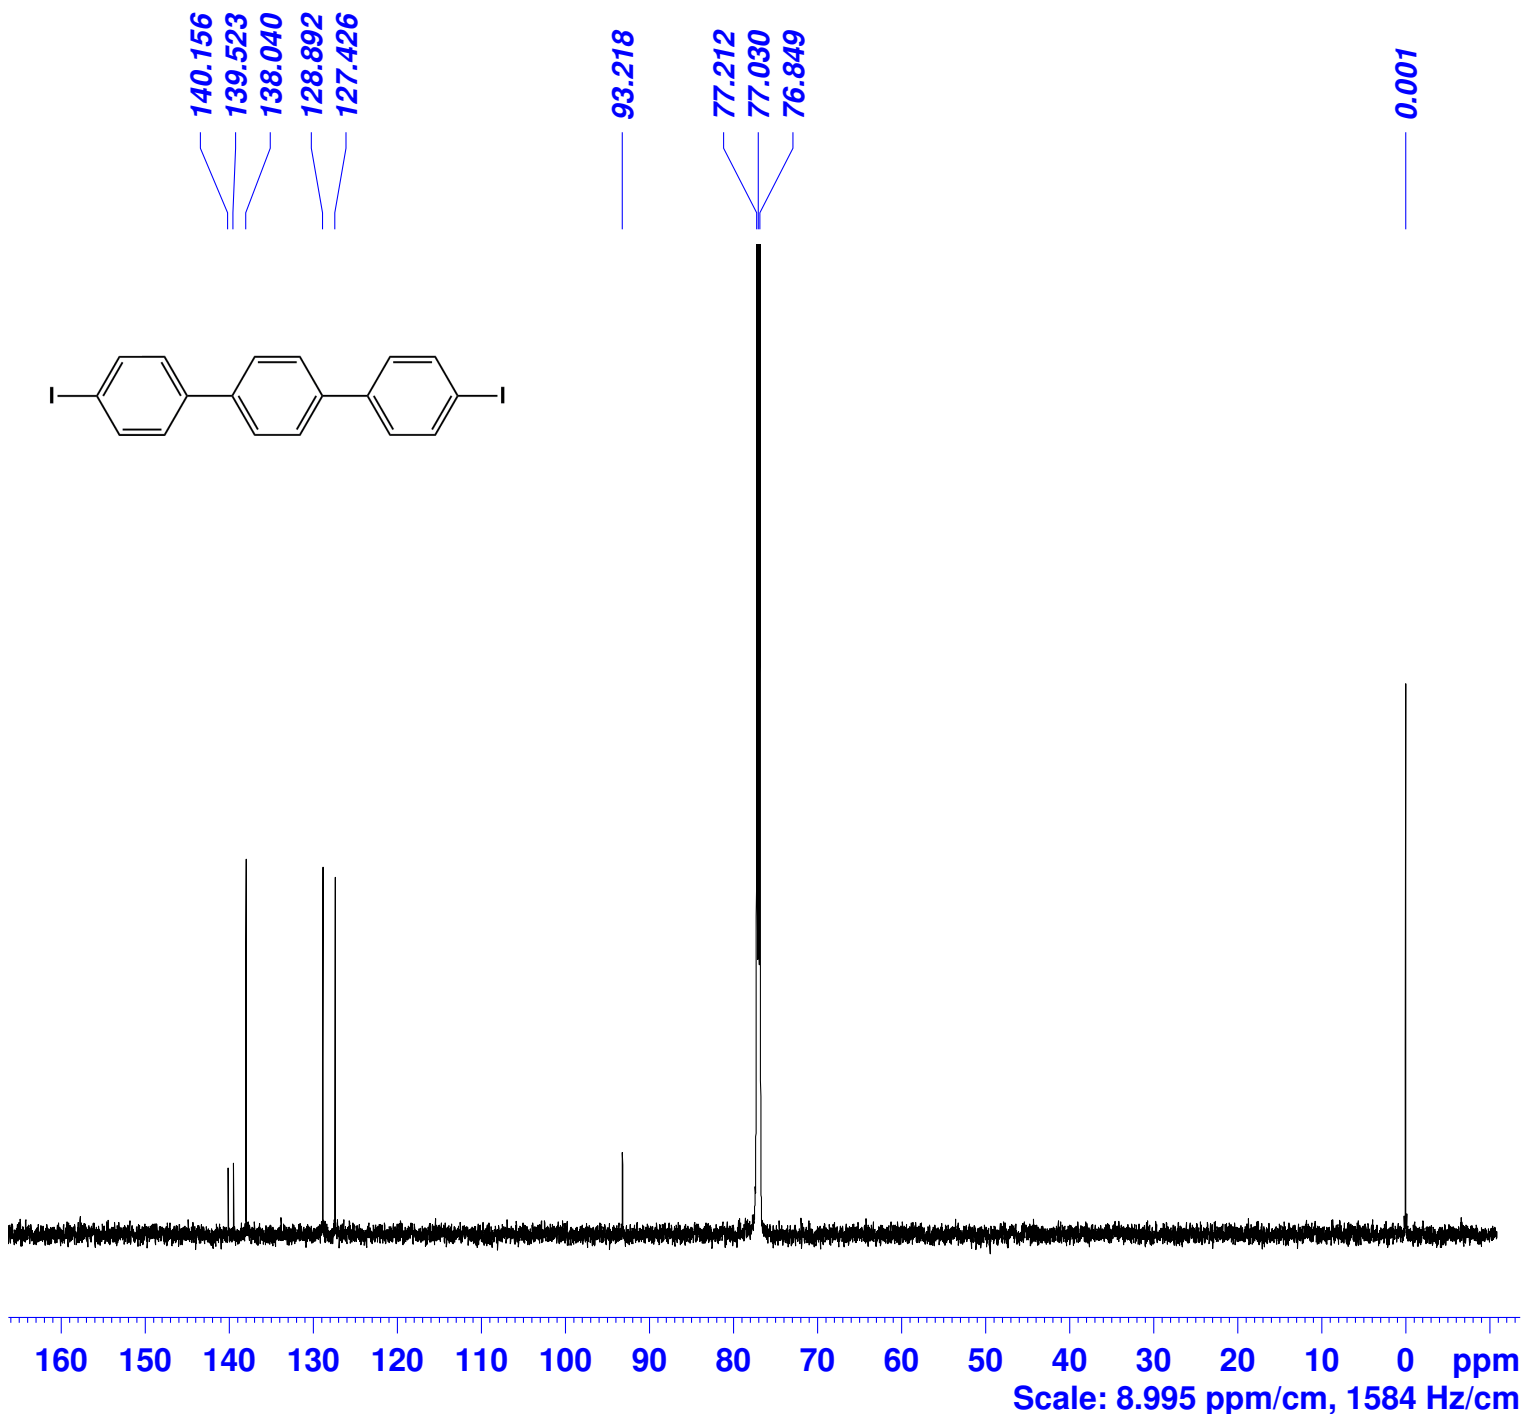



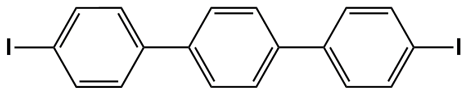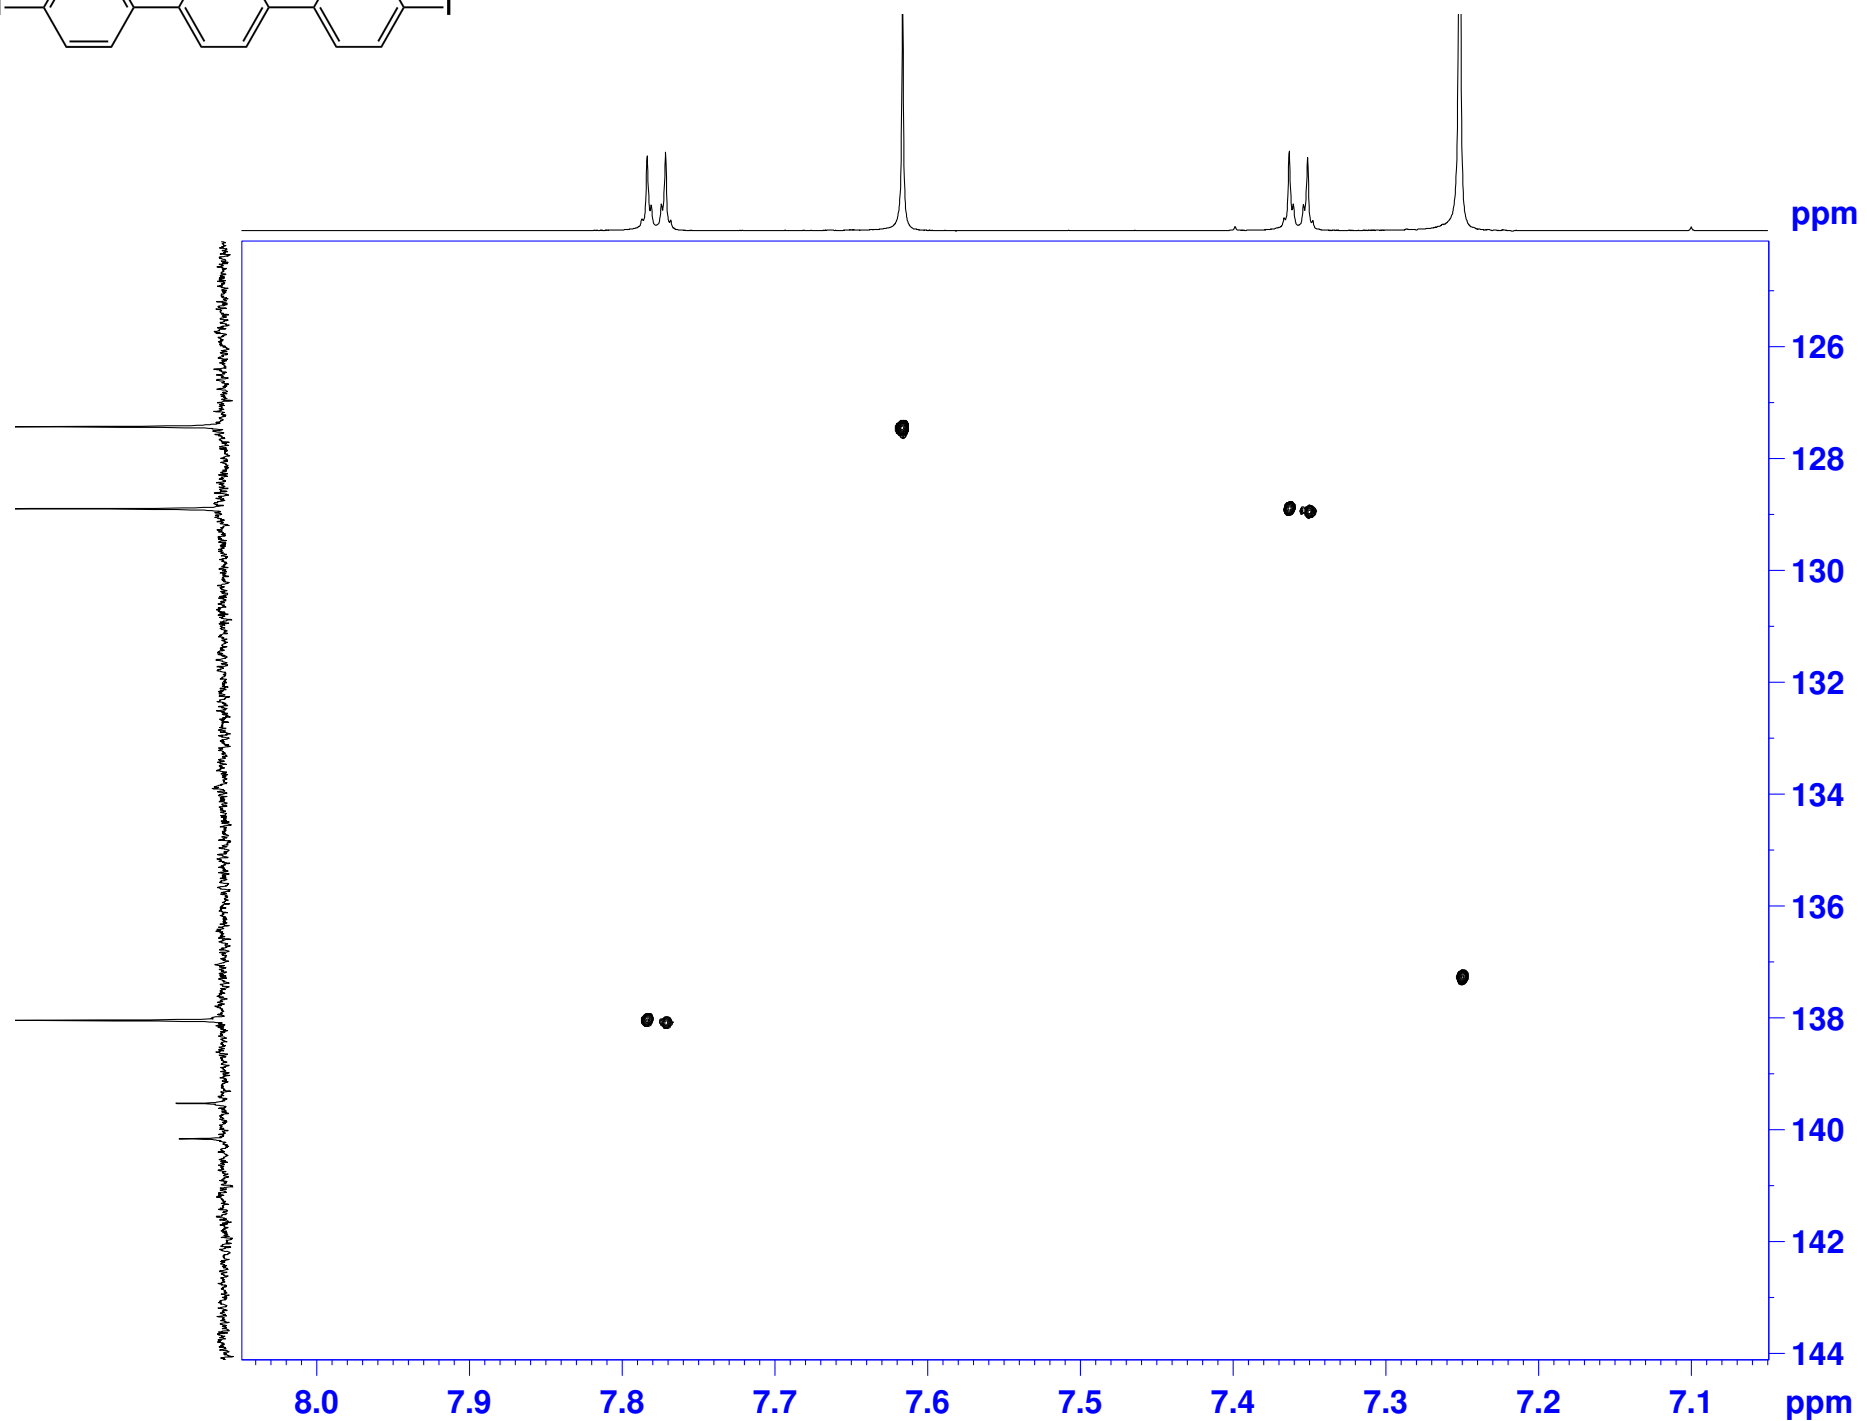

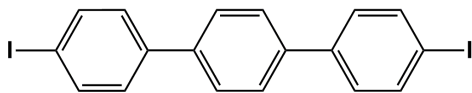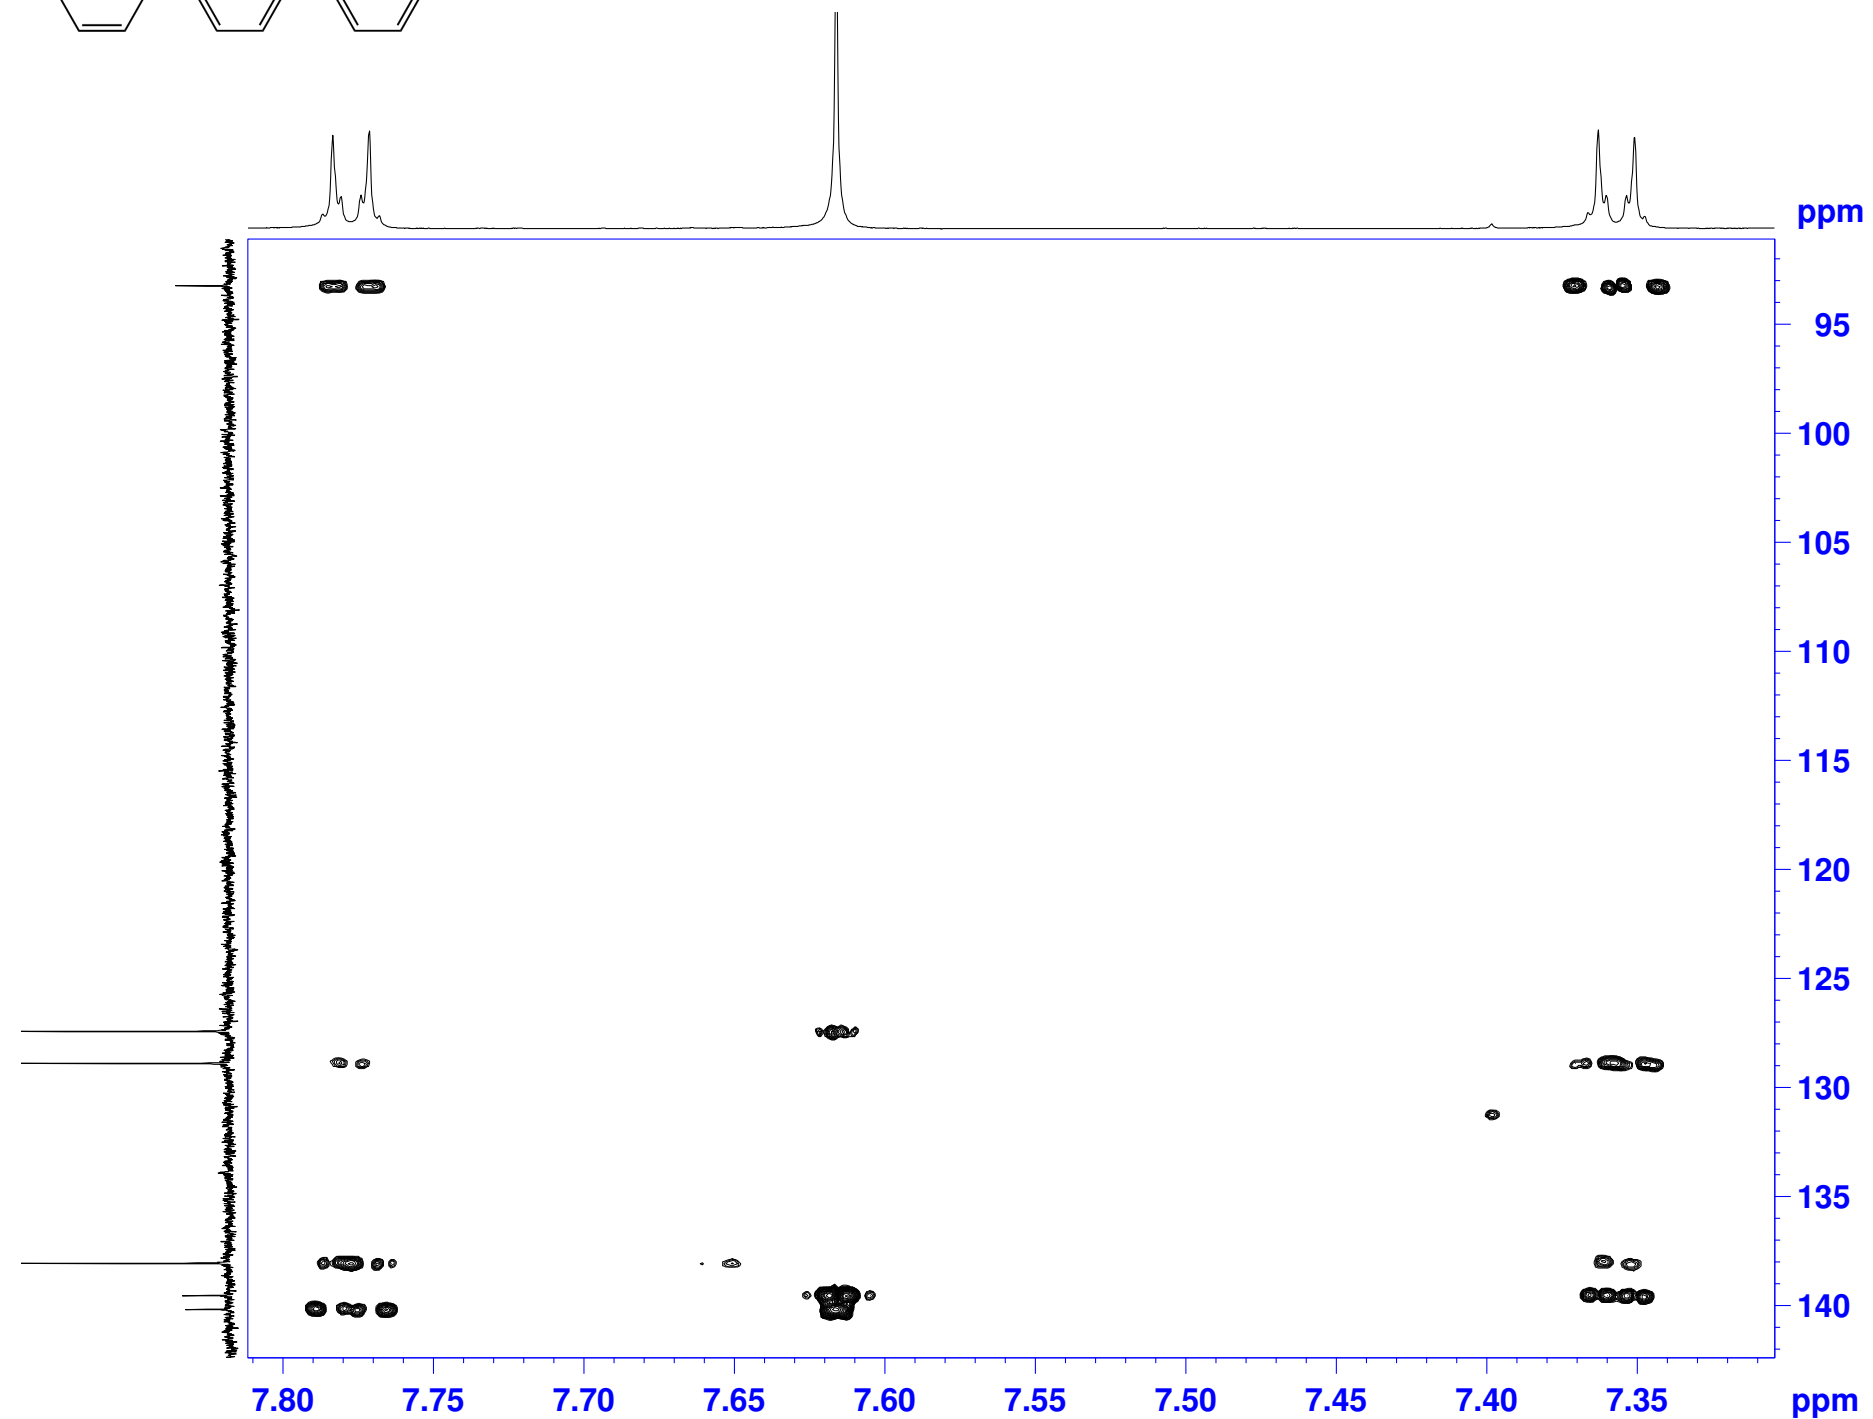

Supplement: d0py00001a1.pdf [file d0py00001a1.pdf]
